# Supplementary material for: Metal-free phosphonation of benzoxazoles and benzothiazoles under oxidative conditions
Source: Royal Society of Chemistry journal article supplement (doi:10.1039/c7qo00318h), 2017-01-01

## Metal-free phosphonation of benzoxazoles and benzothiazoles under oxidative conditions

Jiuhuan Gong,<sup>a‡</sup> Ling Huang,<sup>a‡</sup> Qidu, Deng,<sup>b</sup> Kun Jie,<sup>a</sup>  
Yufeng Wang,<sup>a</sup> Shengmei Guo,<sup>a\*</sup> and Hu Cai<sup>a\*</sup>

Department of Chemistry, Nanchang University

School of Materials Science and Engineering, East China Jiaotong University,

[smguo@ncu.edu.cn](mailto:smguo@ncu.edu.cn); [caihu@ncu.edu.cn](mailto:caihu@ncu.edu.cn)

### 1. Diethyl benzoxazole-2-ylphosphonate (3a)

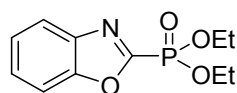

7.2 Hz, 6H);

The title compound was prepared according to the general procedure and purified by column chromatography to give a yellow oil, 75% yield. <sup>1</sup>H NMR (400 MHz, CDCl<sub>3</sub>) δ 7.87 (d, *J* = 7.6 Hz, 1H), 7.65 (d, *J* = 8.0 Hz, 1H), 7.47 (m, 2H), 4.47 – 4.34 (m, 4H), 1.45 (t, *J* =

### 2. Diethyl 5-fluorobenzoxazole-2-ylphosphonate (3b)

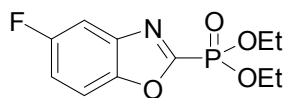

according to the general procedure and purified by column chromatography to give a white oil, 48% yield. <sup>1</sup>H NMR (400 MHz, CDCl<sub>3</sub>) δ 7.60 (dd, *J* = 8.8, 4.0 Hz, 1H), 7.54 (dd, *J* = 8.0, 2.4 Hz, 1H), 7.27 – 7.21 (m, 1H), 4.46 – 4.34 (m, 4H), 1.45 (t, *J* = 7.2 Hz, 6H); <sup>13</sup>C NMR (151 MHz, CDCl<sub>3</sub>) δ 161.30, 157.89 (*J* = 341), 159.69, 159.65, 157.89, 147.58, 147.54, 141.21, 141.12, 141.10, 141.01, 115.85, 115.67, 112.19, 112.12, 107.85, 107.68, 64.90, 64.86, 16.41, 16.37. <sup>31</sup>P NMR (162 MHz, CDCl<sub>3</sub>) δ -2.86. <sup>19</sup>F NMR (376 MHz, CDCl<sub>3</sub>) δ -122.08; HRMS (*m/z*): calcd for C<sub>11</sub>H<sub>14</sub>NPO<sub>4</sub>F [*M*+*H*]<sup>+</sup>: 274.0639, found: 274.0637.

### 3. Diethyl 5-chlorobenzoxazole-2-ylphosphonate (3c)

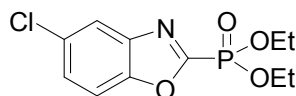

4.48 – 4.34 (m, 4H), 1.45 (t, *J* = 7.2 Hz, 6H);

according to the general procedure and purified by column chromatography to give a yellow oil, 48% yield. <sup>1</sup>H NMR (400 MHz, CDCl<sub>3</sub>) δ 7.85 (s, 1H), 7.59 (d, *J* = 8.8 Hz, 1H), 7.47 (d, *J* = 8.8 Hz, 1H),

### 4. Diethyl 6-chlorobenzoxazole-2-ylphosphonate (3d)

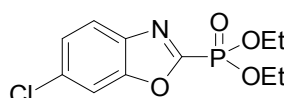

according to the general procedure and purified by column chromatography to give a yellow oil, 52% yield. <sup>1</sup>H NMR (400 MHz, CDCl<sub>3</sub>) δ 7.79 (dd, *J* = 8.4, 4.8 Hz, 1H), 7.69 – 7.62 (m, 1H), 7.47 – 7.39 (m, 1H), 4.48 – 4.33 (m, 4H), 1.45 (dd, *J* = 12.0, 6.7 Hz, 6H); <sup>13</sup>C NMR (151 MHz, CDCl<sub>3</sub>) δ 158.46, 156.70, 151.35, 151.31, 139.10, 138.99, 133.46, 126.37, 122.21, 112.18, 64.89, 64.85, 16.37, 16.33. <sup>31</sup>P NMR (162 MHz, CDCl<sub>3</sub>) δ -2.86. HRMS (*m/z*): calcd for C<sub>11</sub>H<sub>14</sub>NPO<sub>4</sub>Cl [*M*+*H*]<sup>+</sup>: 290.0343, found: 290.0347.

**5. Diethyl 7-chlorobenzoxazole-2-ylphosphonate (3e)** The title compound was prepared according to the general procedure and purified by column chromatography to give a yellow oil, 46% yield. <sup>1</sup>H NMR (400 MHz, CDCl<sub>3</sub>) δ 7.77 (d, *J* = 8.0 Hz, 1H), 7.49 (d, *J* = 7.6 Hz, 1H), 7.37 (t, *J* = 8.0 Hz, 1H), 4.42 (m, 4H), 1.46 (t, *J* = 7.2 Hz, 6H); <sup>13</sup>C NMR (151 MHz, CDCl<sub>3</sub>) δ 158.40, 156.64, 147.96, 147.92, 141.59, 141.48, 127.75, 126.21, 120.16, 117.10, 65.02, 64.98, 16.43, 16.39. <sup>31</sup>P NMR (162 MHz, CDCl<sub>3</sub>) δ -3.10. HRMS (*m/z*): calcd for C<sub>11</sub>H<sub>14</sub>NPO<sub>4</sub>Cl [M+H]<sup>+</sup>: 290.0343, found: 290.0344.

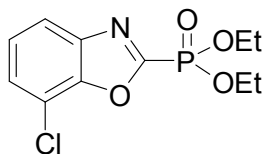

**6. Diethyl 5-methylbenzoxazole-2-ylphosphonate (3f)** The title compound was prepared according to the general procedure and purified by column chromatography to give a yellow oil, 54% yield. <sup>1</sup>H NMR (400 MHz, CDCl<sub>3</sub>) δ 7.56 (s, 1H), 7.44 (d, *J* = 8.4 Hz, 1H), 7.22 (d, *J* = 8.4 Hz, 1H), 4.31 (m, 4H), 2.42 (s, 3H), 1.36 (t, *J* = 7.2 Hz, 6H).

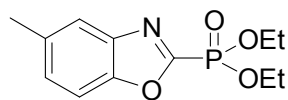

**7. Diethyl 6-methylbenzoxazole-2-ylphosphonate (3g)** The title compound was prepared according to the general procedure and purified by column chromatography to give a yellow oil, 56% yield. <sup>1</sup>H NMR (400 MHz, CDCl<sub>3</sub>) δ 7.72 (d, *J* = 8.4 Hz, 1H), 7.43 (s, 1H), 7.24 (d, *J* = 8.4 Hz, 1H), 4.43 – 4.33 (m, 4H), 2.53 (s, 3H), 1.43 (t, *J* = 7.2 Hz, 6H);

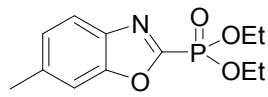

**8. Diethyl 7-methylbenzoxazole-2-ylphosphonate (3h)** The title compound was prepared according to the general procedure and purified by column chromatography to give a yellow oil, 60% yield. <sup>1</sup>H NMR (400 MHz, CDCl<sub>3</sub>) δ 7.68 (d, *J* = 7.2 Hz, 1H), 7.31 (dd, *J* = 15.2, 7.6 Hz, 2H), 4.45 – 4.34 (m, 4H), 2.58 (s, 3H), 1.44 (t, *J* = 7.2 Hz, 6H). <sup>13</sup>C NMR (151 MHz, CDCl<sub>3</sub>) δ 157.45, 155.68, 150.66, 150.63, 140.03, 139.93, 128.32, 125.44, 122.42, 118.98, 64.73, 64.69, 16.44, 16.40, 15.42. <sup>31</sup>P NMR (243 MHz, CDCl<sub>3</sub>) δ -1.94. HRMS (*m/z*): calcd for C<sub>12</sub>H<sub>17</sub>NPO<sub>4</sub> [M+H]<sup>+</sup>: 270.0890, found: 270.0887.

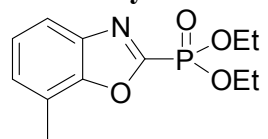

**9. Diethyl 5-tert-butylbenzoxazole-2-ylphosphonate (3i)** The title compound was prepared according to the general procedure and purified by column chromatography to give a yellow oil, 63% yield. <sup>1</sup>H NMR (400 MHz, CDCl<sub>3</sub>) δ 7.87 (s, 1H), 7.56 (s, 2H), 4.46 – 4.30 (m, 4H), 1.43 (t, *J* = 7.2 Hz, 6H), 1.39 (s, 9H);

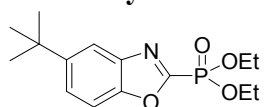

**10. Diethyl benzothiazole-2-ylphosphonate (3j)** The title compound was prepared according to the general procedure and purified by column chromatography to give a yellow oil, 77% yield. <sup>1</sup>H NMR (400 MHz, CDCl<sub>3</sub>) δ 8.25 (d, *J* = 8.0 Hz, 1H), 8.02 (d, *J* = 7.6 Hz, 1H), 7.56 (m, 2H), 4.43 – 4.26 (m, 4H), 1.41 (t, *J* = 7.2 Hz, 6H);

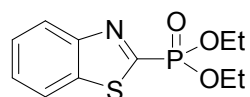

**11. Diethyl 5-chlorobenzothiazole-2-ylphosphonate (3k)** The title compound was prepared according to the general procedure and purified by column

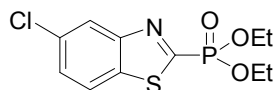

chromatography to give a yellow oil, 77% yield.  $^1\text{H}$  NMR (400 MHz,  $\text{CDCl}_3$ )  $\delta$  8.22 (s, 1H), 7.93 (d,  $J = 7.2$  Hz, 1H), 7.51 (d,  $J = 7.6$  Hz, 1H), 4.43 – 4.25 (m, 4H), 1.41 (t,  $J = 5.6$  Hz, 6H).  $^{13}\text{C}$  NMR (151 MHz,  $\text{CDCl}_3$ )  $\delta$  163.15, 161.57, 155.51, 155.32, 134.72, 134.71, 133.12, 127.72, 124.57, 122.78, 122.77, 64.36, 64.32, 16.36, 16.32.  $^{31}\text{P}$  NMR (243 MHz,  $\text{CDCl}_3$ )  $\delta$  3.18. HRMS ( $m/z$ ): calcd for  $\text{C}_{11}\text{H}_{14}\text{NPO}_3\text{ClS}$   $[\text{M}+\text{H}]^+$ : 306.0115, found: 306.0119.

**12. Diethyl 6-methoxy-benzothiazole-2-ylphosphonate (3l)** The title compound was

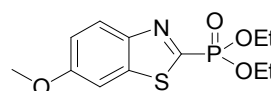 prepared according to the general procedure and purified by column chromatography to give a yellow oil, 77% yield.  $^1\text{H}$  NMR (400 MHz,  $\text{CDCl}_3$ )  $\delta$  8.11 (d,  $J = 9.2$  Hz, 1H), 7.41 (s, 1H), 7.18 (d,  $J = 9.2$  Hz, 1H), 4.30 (m, 4H), 3.91 (s, 3H), 1.39 (t,  $J = 7.2$  Hz, 6H).

**13. Dimethyl benzothiazole -2-ylphosphonate (3m)** The title compound was prepared

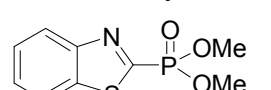 according to the general procedure and purified by column chromatography to give a yellow oil, 49% yield.  $^1\text{H}$  NMR (400 MHz,  $\text{CDCl}_3$ )  $\delta$  8.26 (d,  $J = 8.4$  Hz, 1H), 8.03 (d,  $J = 7.6$  Hz, 1H), 7.58 (m, 2H), 3.97 (m, 6H);  $^{13}\text{C}$  NMR (151 MHz,  $\text{CDCl}_3$ )  $\delta$  159.50, 157.91, 154.69, 154.50, 136.47, 127.26, 127.06, 125.06, 122.08, 54.35, 54.31.  $^{31}\text{P}$  NMR (162 MHz,  $\text{CDCl}_3$ )  $\delta$  6.71. HRMS ( $m/z$ ): calcd for  $\text{C}_9\text{H}_{11}\text{NPO}_3\text{S}$   $[\text{M}+\text{H}]^+$ : 244.0192, found: 244.0193.

**14. Dibutyl benzoxazole-2-ylphosphonate (3o)** The title compound was prepared

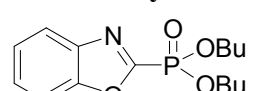 according to the general procedure and purified by column chromatography to give a yellow oil, 63% yield.  $^1\text{H}$  NMR (400 MHz,  $\text{CDCl}_3$ )  $\delta$  7.87 (d,  $J = 7.6$  Hz, 1H), 7.65 (d,  $J = 8.4$  Hz, 1H), 7.46 (m, 2H), 4.39 – 4.25 (m, 4H), 1.81 – 1.72 (m, 4H), 1.50 – 1.40 (m, 4H), 0.94 (t,  $J = 7.2$  Hz, 6H);  $^{13}\text{C}$  NMR (151 MHz,  $\text{CDCl}_3$ )  $\delta$  157.75, 155.99, 151.22, 151.18, 140.41, 140.30, 127.50, 125.41, 121.75, 111.65, 68.35, 68.30, 32.44, 32.40, 18.70, 13.62.  $^{31}\text{P}$  NMR (162 MHz,  $\text{CDCl}_3$ )  $\delta$  -1.95. HRMS ( $m/z$ ): calcd for  $\text{C}_{15}\text{H}_{23}\text{NPO}_4$   $[\text{M}+\text{H}]^+$ : 312.1359, found: 312.1358.

**15. Dibutyl benzothiazole-2-ylphosphonate (3p)** The title compound was prepared

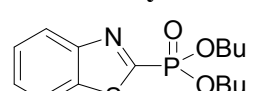 according to the general procedure and purified by column chromatography to give a yellow solid, 69% yield.  $^1\text{H}$  NMR (400 MHz,  $\text{CDCl}_3$ )  $\delta$  8.25 (d,  $J = 7.6$  Hz, 1H), 8.02 (d,  $J = 7.6$  Hz, 1H), 7.56 (m, 2H), 4.34 – 4.19 (m, 4H), 1.77 – 1.68 (m, 4H), 1.42 (m, 4H), 0.92 (t,  $J = 7.2$  Hz, 6H).  $^{13}\text{C}$  NMR (151 MHz,  $\text{CDCl}_3$ )  $\delta$  160.92, 159.34, 154.79, 154.60, 136.52, 127.08, 126.93, 125.06, 122.06, 67.86, 67.82, 32.49, 32.44, 18.74, 13.65.  $^{31}\text{P}$  NMR (162 MHz,  $\text{CDCl}_3$ )  $\delta$  4.19. HRMS ( $m/z$ ): calcd for  $\text{C}_{15}\text{H}_{23}\text{NPO}_3\text{S}$   $[\text{M}+\text{H}]^+$ : 328.1131, found: 328.1130.

**16. Diisopropyl benzoxazole-2-ylphosphonate (3q)** The title compound was prepared

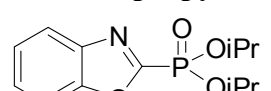 according to the general procedure and purified by column chromatography to give a yellow oil, 60% yield.  $^1\text{H}$  NMR (400 MHz,  $\text{CDCl}_3$ )  $\delta$  7.87 (d,  $J = 7.9$  Hz, 1H), 7.64 (d,  $J = 8.0$  Hz, 1H), 7.45 (m, 2H), 4.97 (m, 2H), 1.43 (m, 12H);

**17. Diisopropyl benzothiazole-2-ylphosphonate (3r)** The title compound was prepared

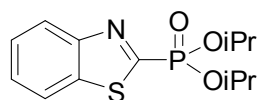

according to the general procedure and purified by column chromatography to give a yellow solid, 78% yield.  $^1\text{H}$  NMR (400 MHz,  $\text{CDCl}_3$ )  $\delta$  8.25 (d,  $J = 8.1$  Hz, 1H), 8.01 (d,  $J = 7.8$  Hz, 1H), 7.55 (m, 2H), 4.92 (m, 2H), 1.43 (d,  $J = 6.2$  Hz, 6H), 1.34 (d,  $J = 6.2$  Hz, 6H);

**18. (4-Methyl-thiazol-2-yl)-phosphonic acid diethyl ester (3s)** The title compound

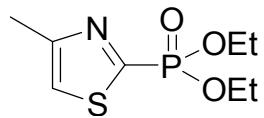

was prepared according to the general procedure and purified by column chromatography to give a yellow solid, 27% yield.  $^1\text{H}$  NMR (400 MHz,  $\text{CDCl}_3$ )  $\delta$  7.22 (d,  $J = 8.0$  Hz, 1H), 4.34 – 4.14 (m, 4H), 2.56 (d,  $J = 8.0$  Hz, 3H), 1.37 (m, 6H).  $^{13}\text{C}$  NMR (101 MHz,  $\text{CDCl}_3$ )  $\delta$  156.73, 119.65, 63.84, 63.79, 17.08, 16.43, 16.36.  $^{31}\text{P}$  NMR (162 MHz,  $\text{CDCl}_3$ )  $\delta$  4.61. HRMS ( $m/z$ ): calcd for  $\text{C}_8\text{H}_{15}\text{NPO}_3\text{S}$  [ $\text{M}+\text{H}$ ] $^+$ : 236.0505, found: 236.0506.

**19. Thiazol-2-yl-phosphonic acid diethyl ester (3t)** The title compound was prepared

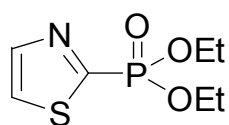

according to the general procedure and purified by column chromatography to give a yellow solid, 9% yield.  $^1\text{H}$  NMR (400 MHz,  $\text{CDCl}_3$ )  $\delta$  8.17 – 8.11 (m, 1H), 7.70 (t,  $J = 3.2$  Hz, 1H), 4.36 – 4.18 (m, 4H), 1.38 (t,  $J = 7.2$  Hz, 6H).  $^{13}\text{C}$  NMR (151 MHz,  $\text{CDCl}_3$ )  $\delta$  159.75, 158.13, 146.27, 146.08, 124.66, 64.00, 63.96, 16.41, 16.37.  $^{31}\text{P}$  NMR (243 MHz,  $\text{CDCl}_3$ )  $\delta$  4.07. HRMS ( $m/z$ ): calcd for  $\text{C}_7\text{H}_{13}\text{NPO}_3\text{S}$  [ $\text{M}+\text{H}$ ] $^+$ : 222.0348, found: 222.0350.

**The studies of tracing the procedure of phosphorus**

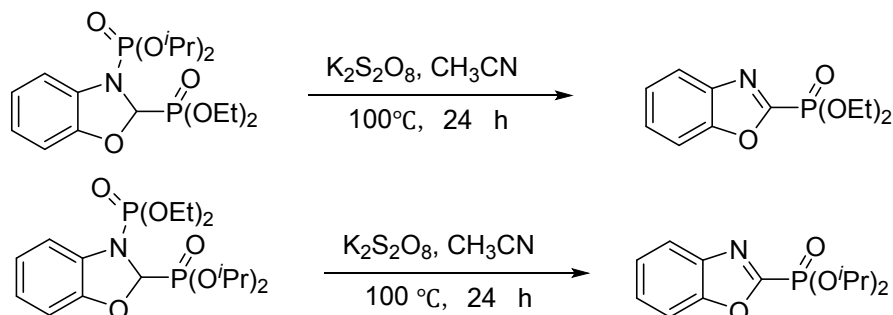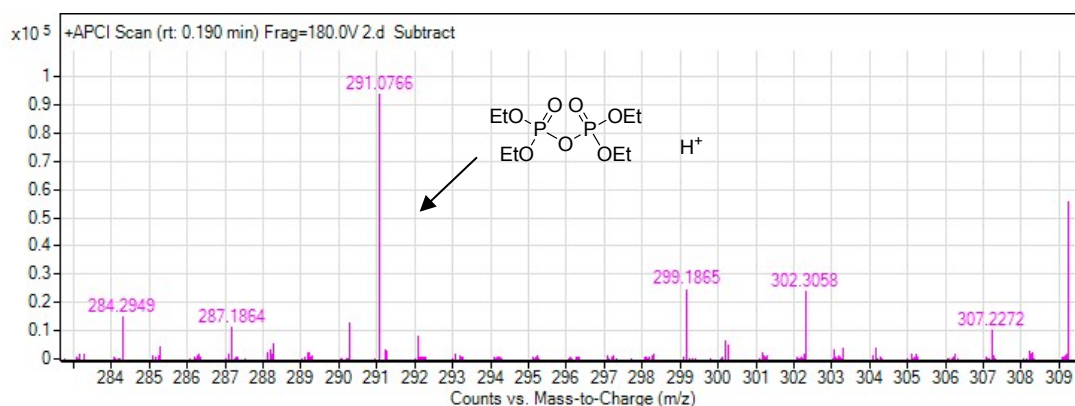

## The detection of intermediate by HR-MS

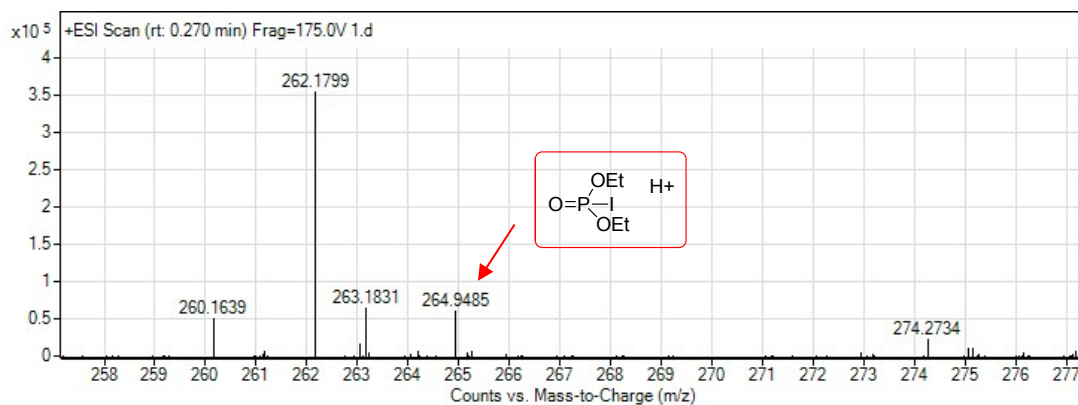

## The change of the amount of $\text{ICH}_2\text{CH}_3$ with the procedure using the nitrobenzene as internal standard.

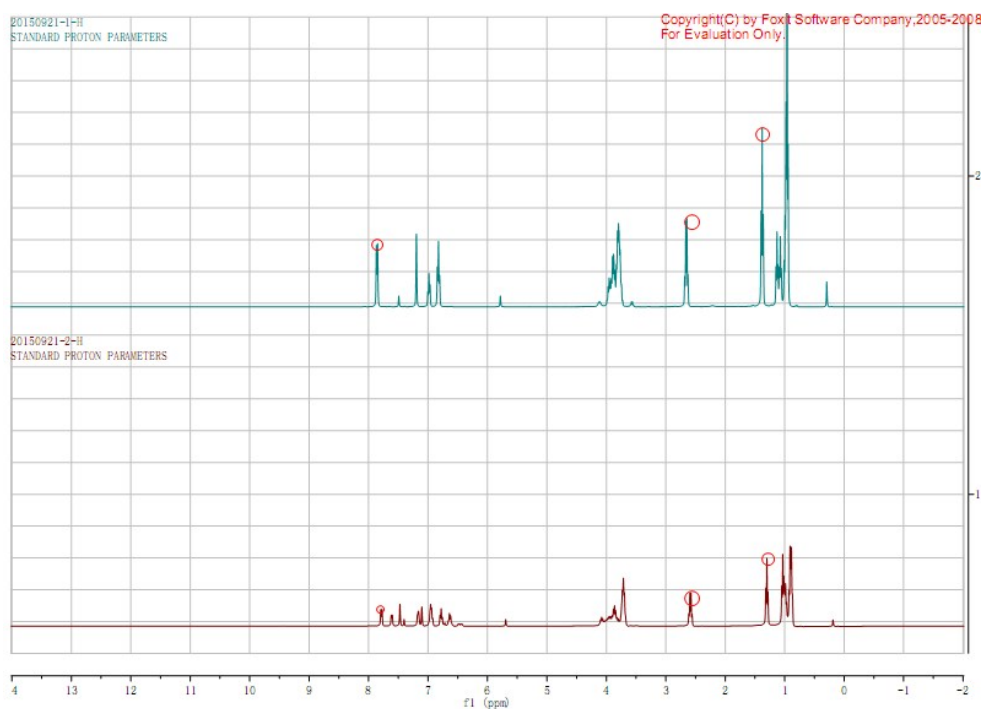

## The probable mechanism of the reaction

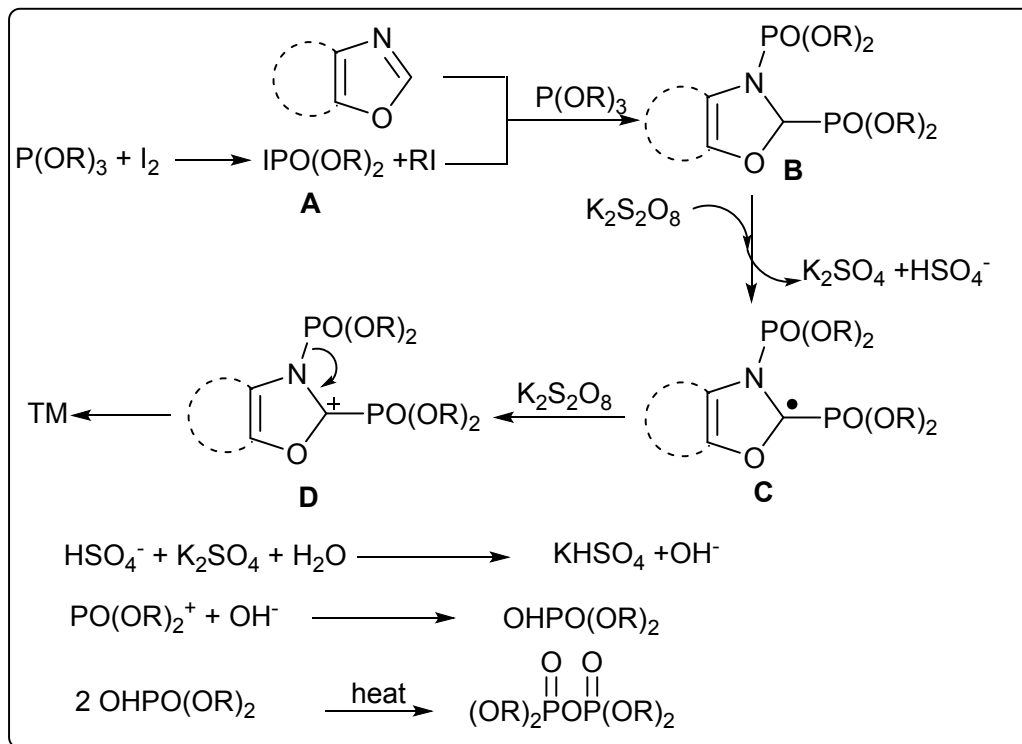

g-14-12-15-4  
Gradient Shimming

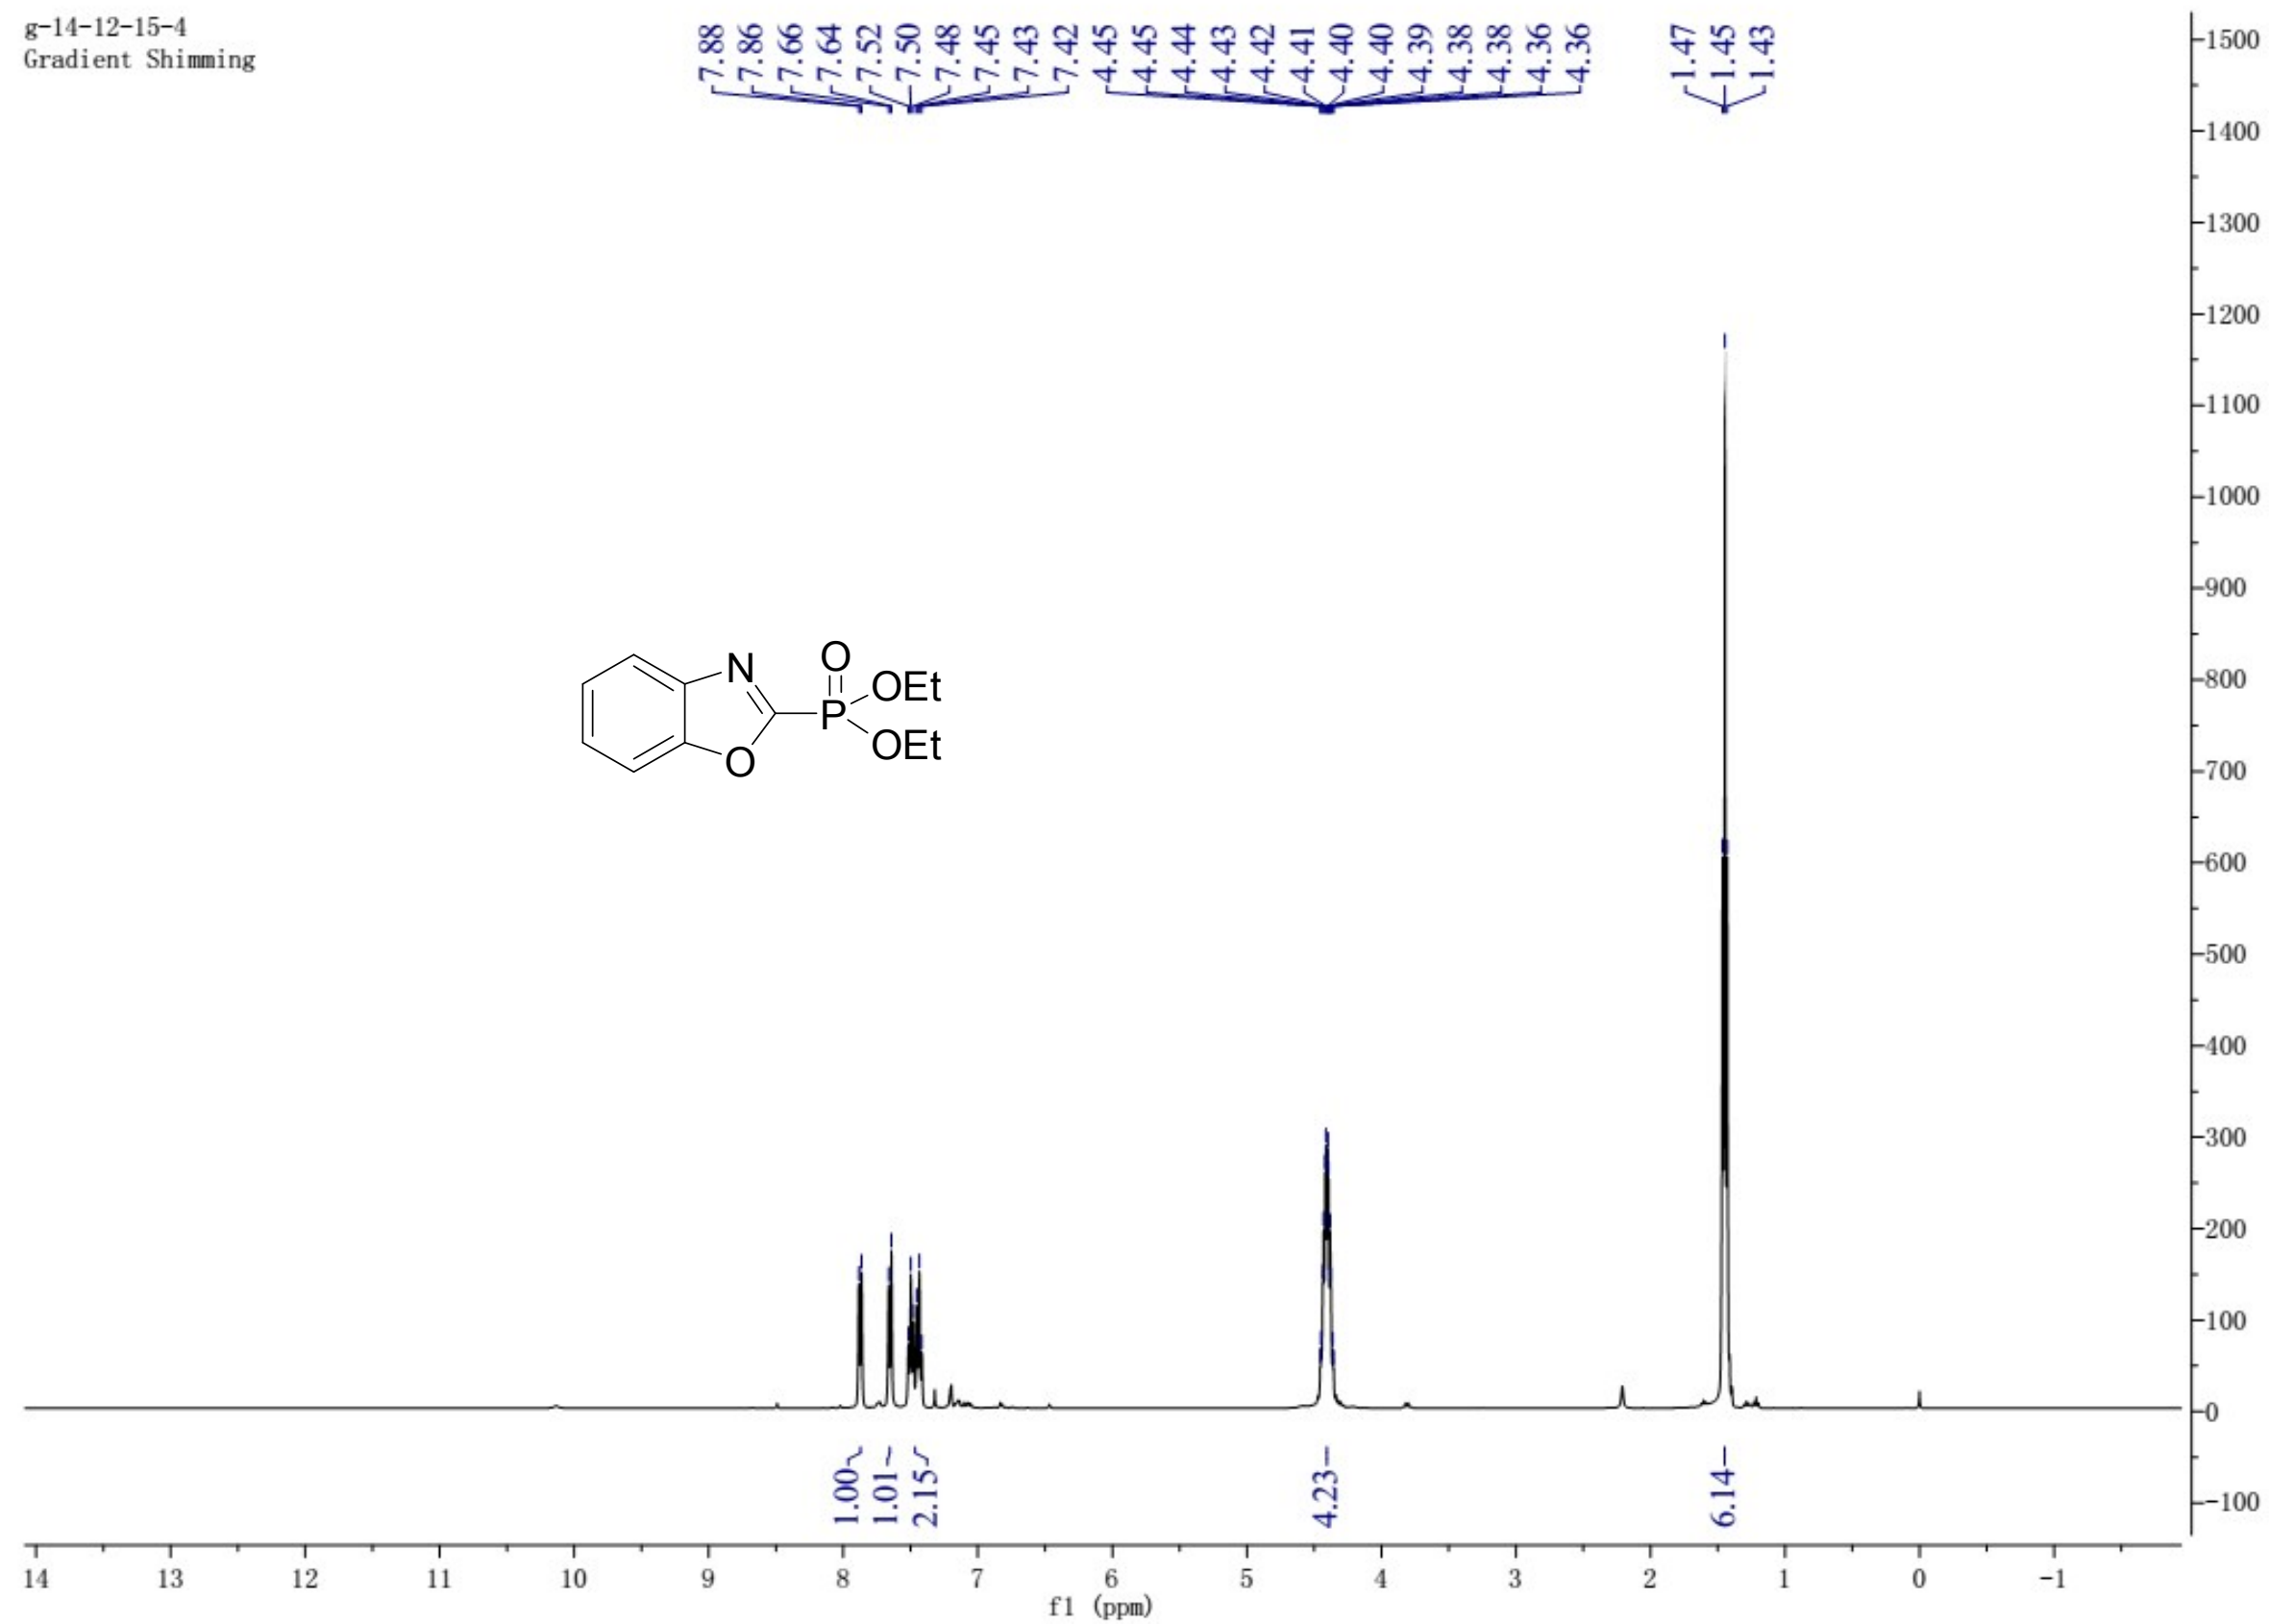

20141211-3H  
Gradient Shimming

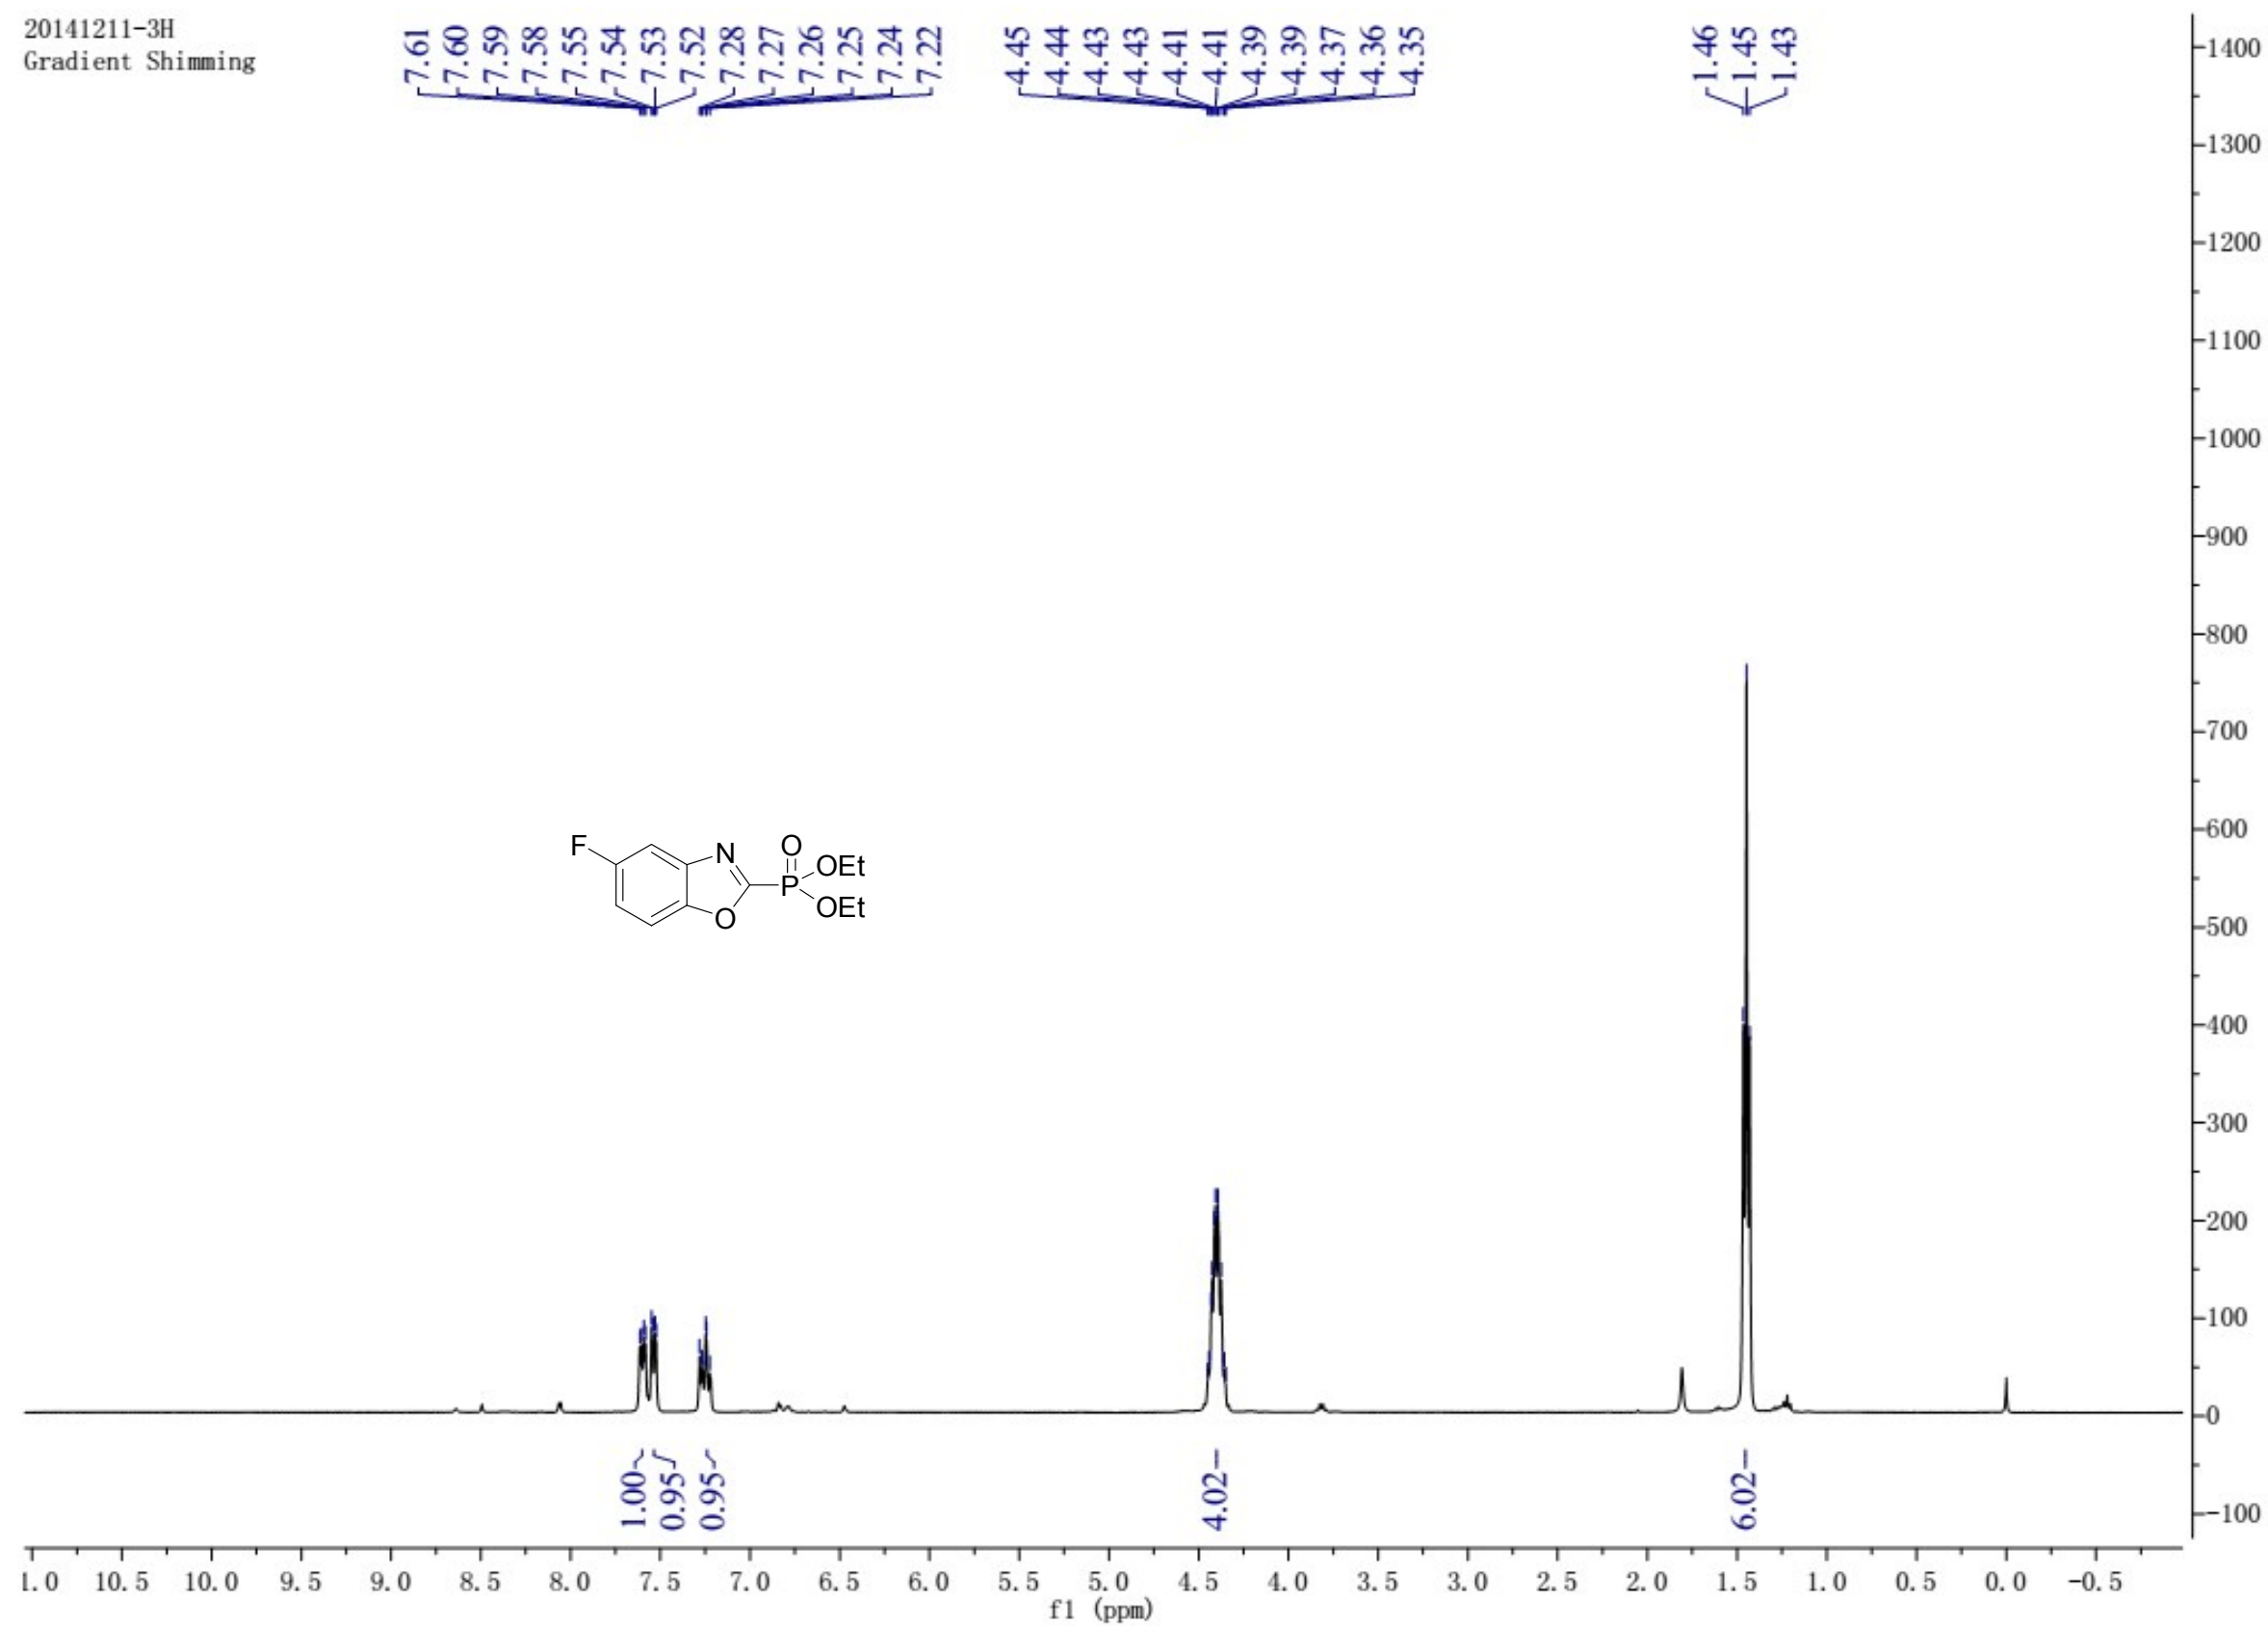

Y150059  
sample3 13C

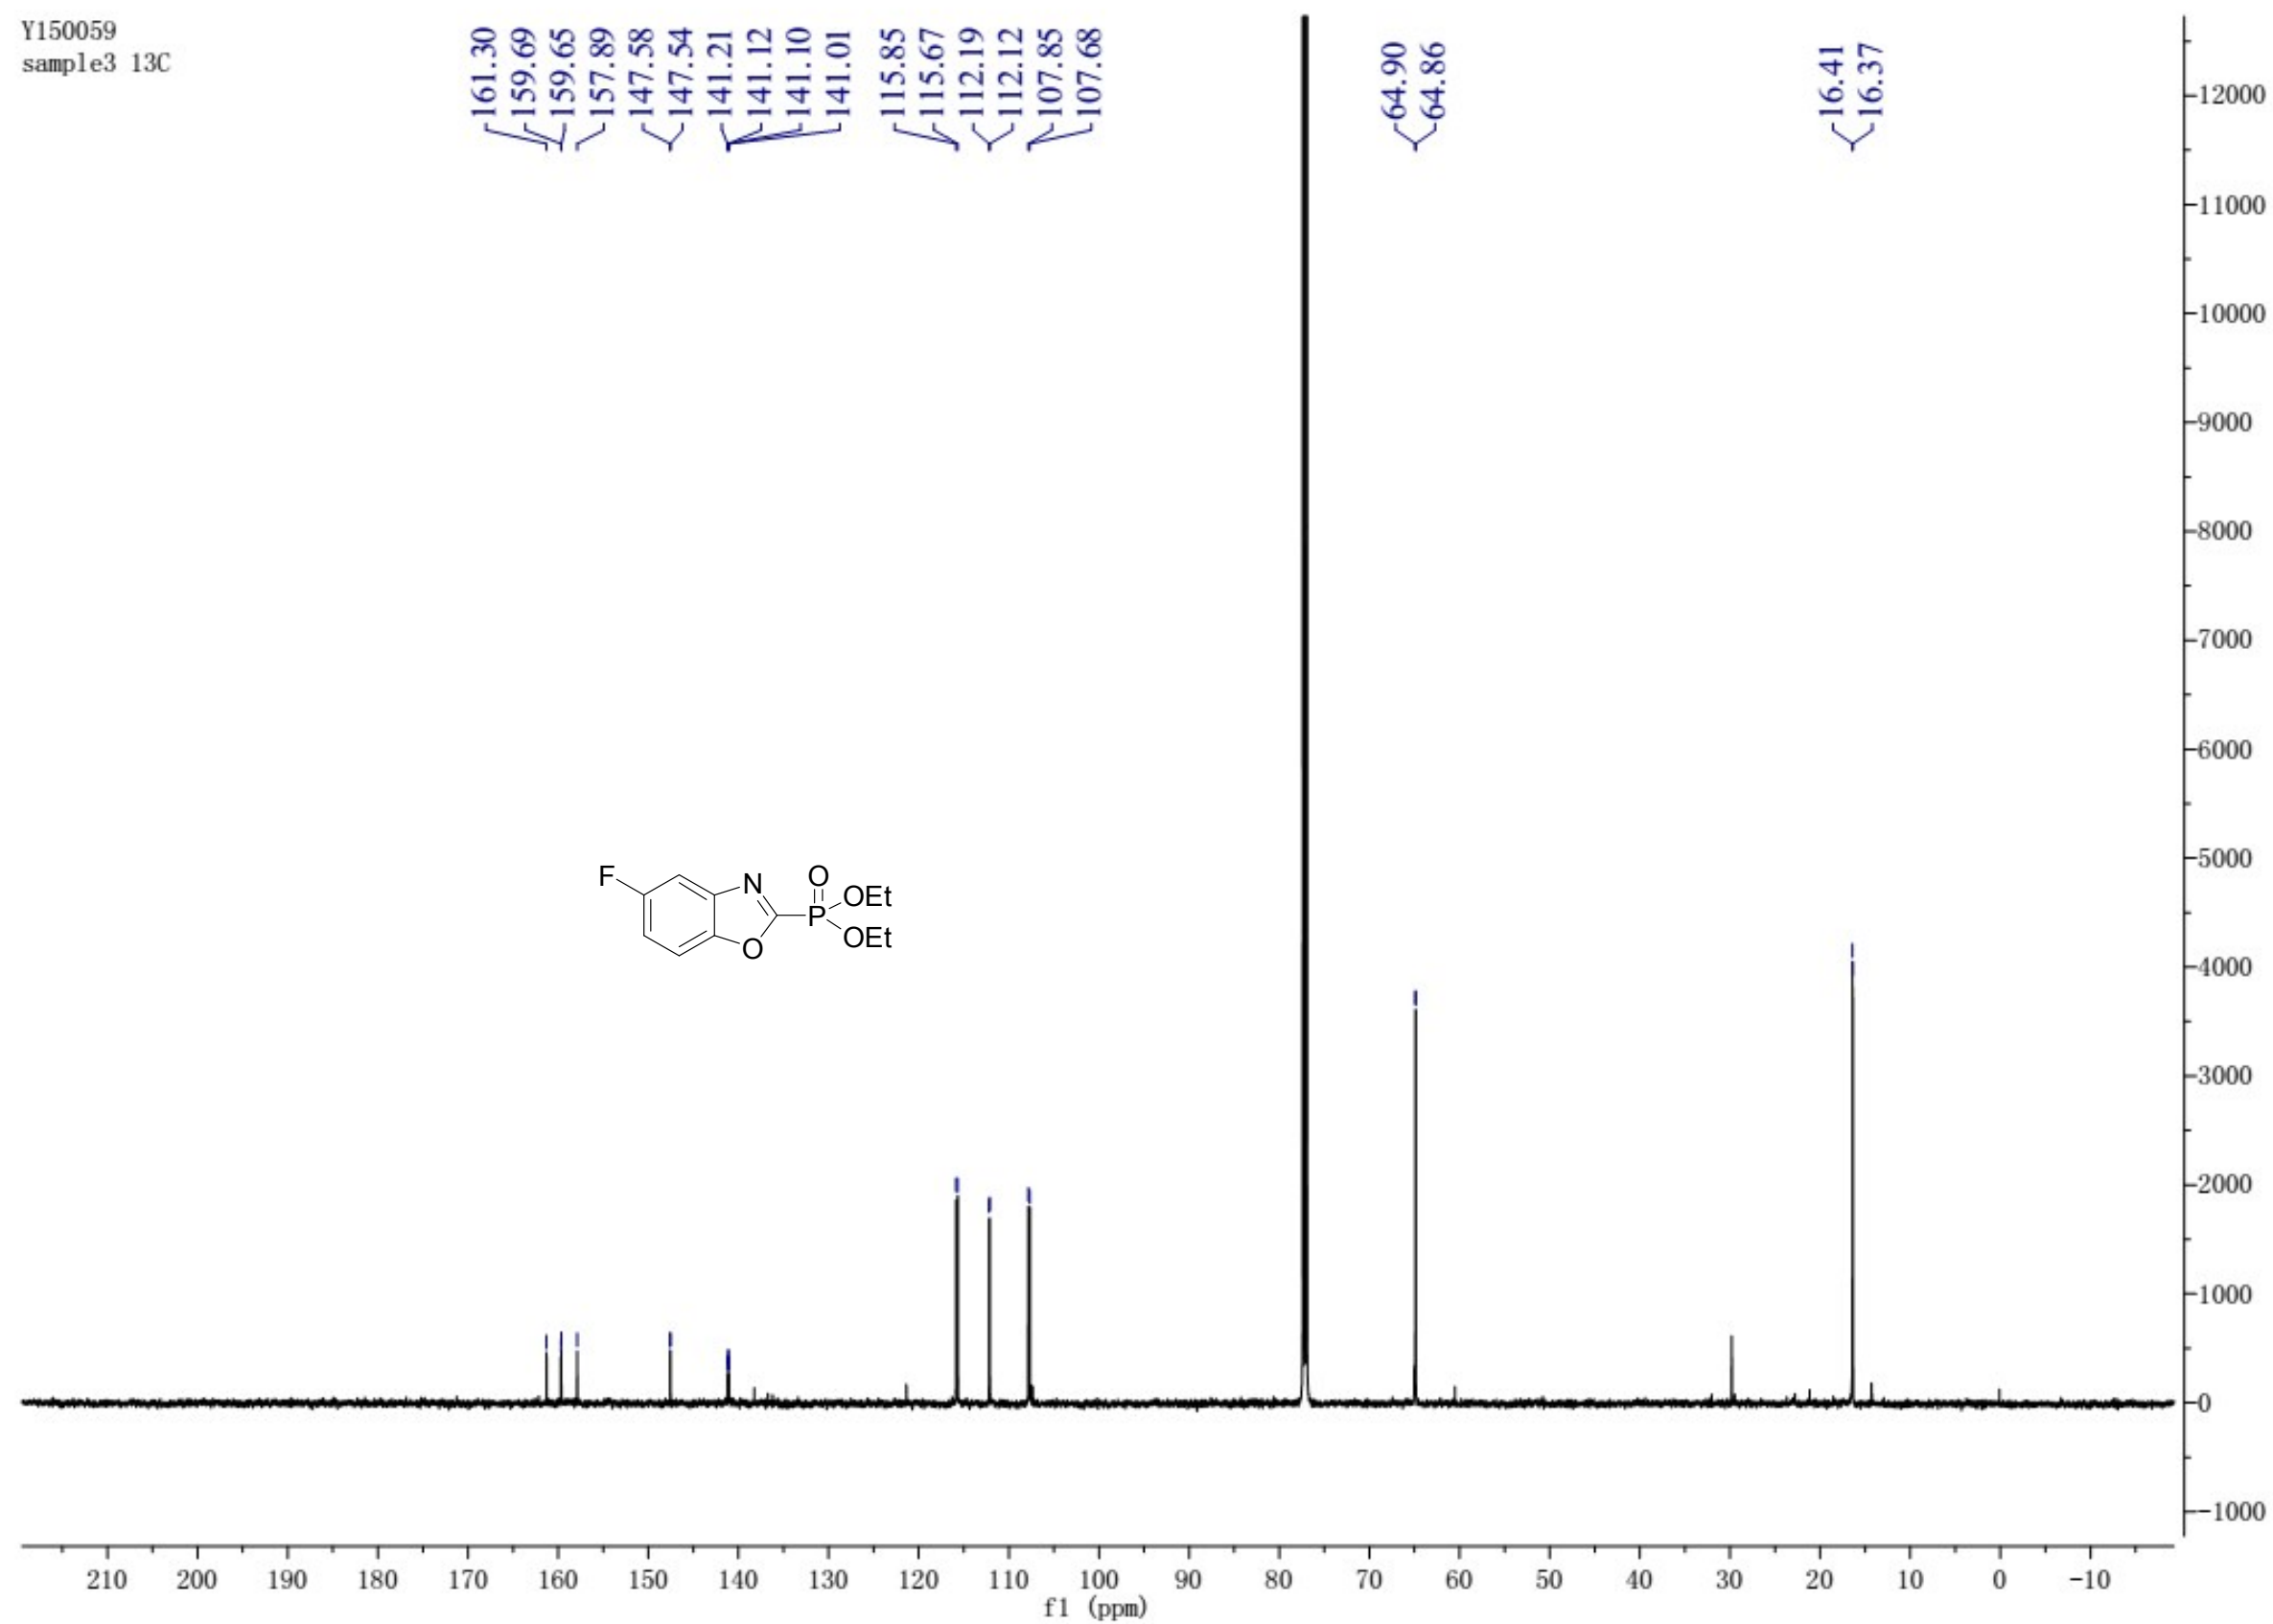

yrz-6

-2.86

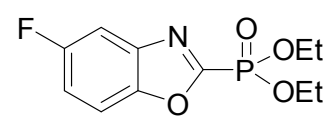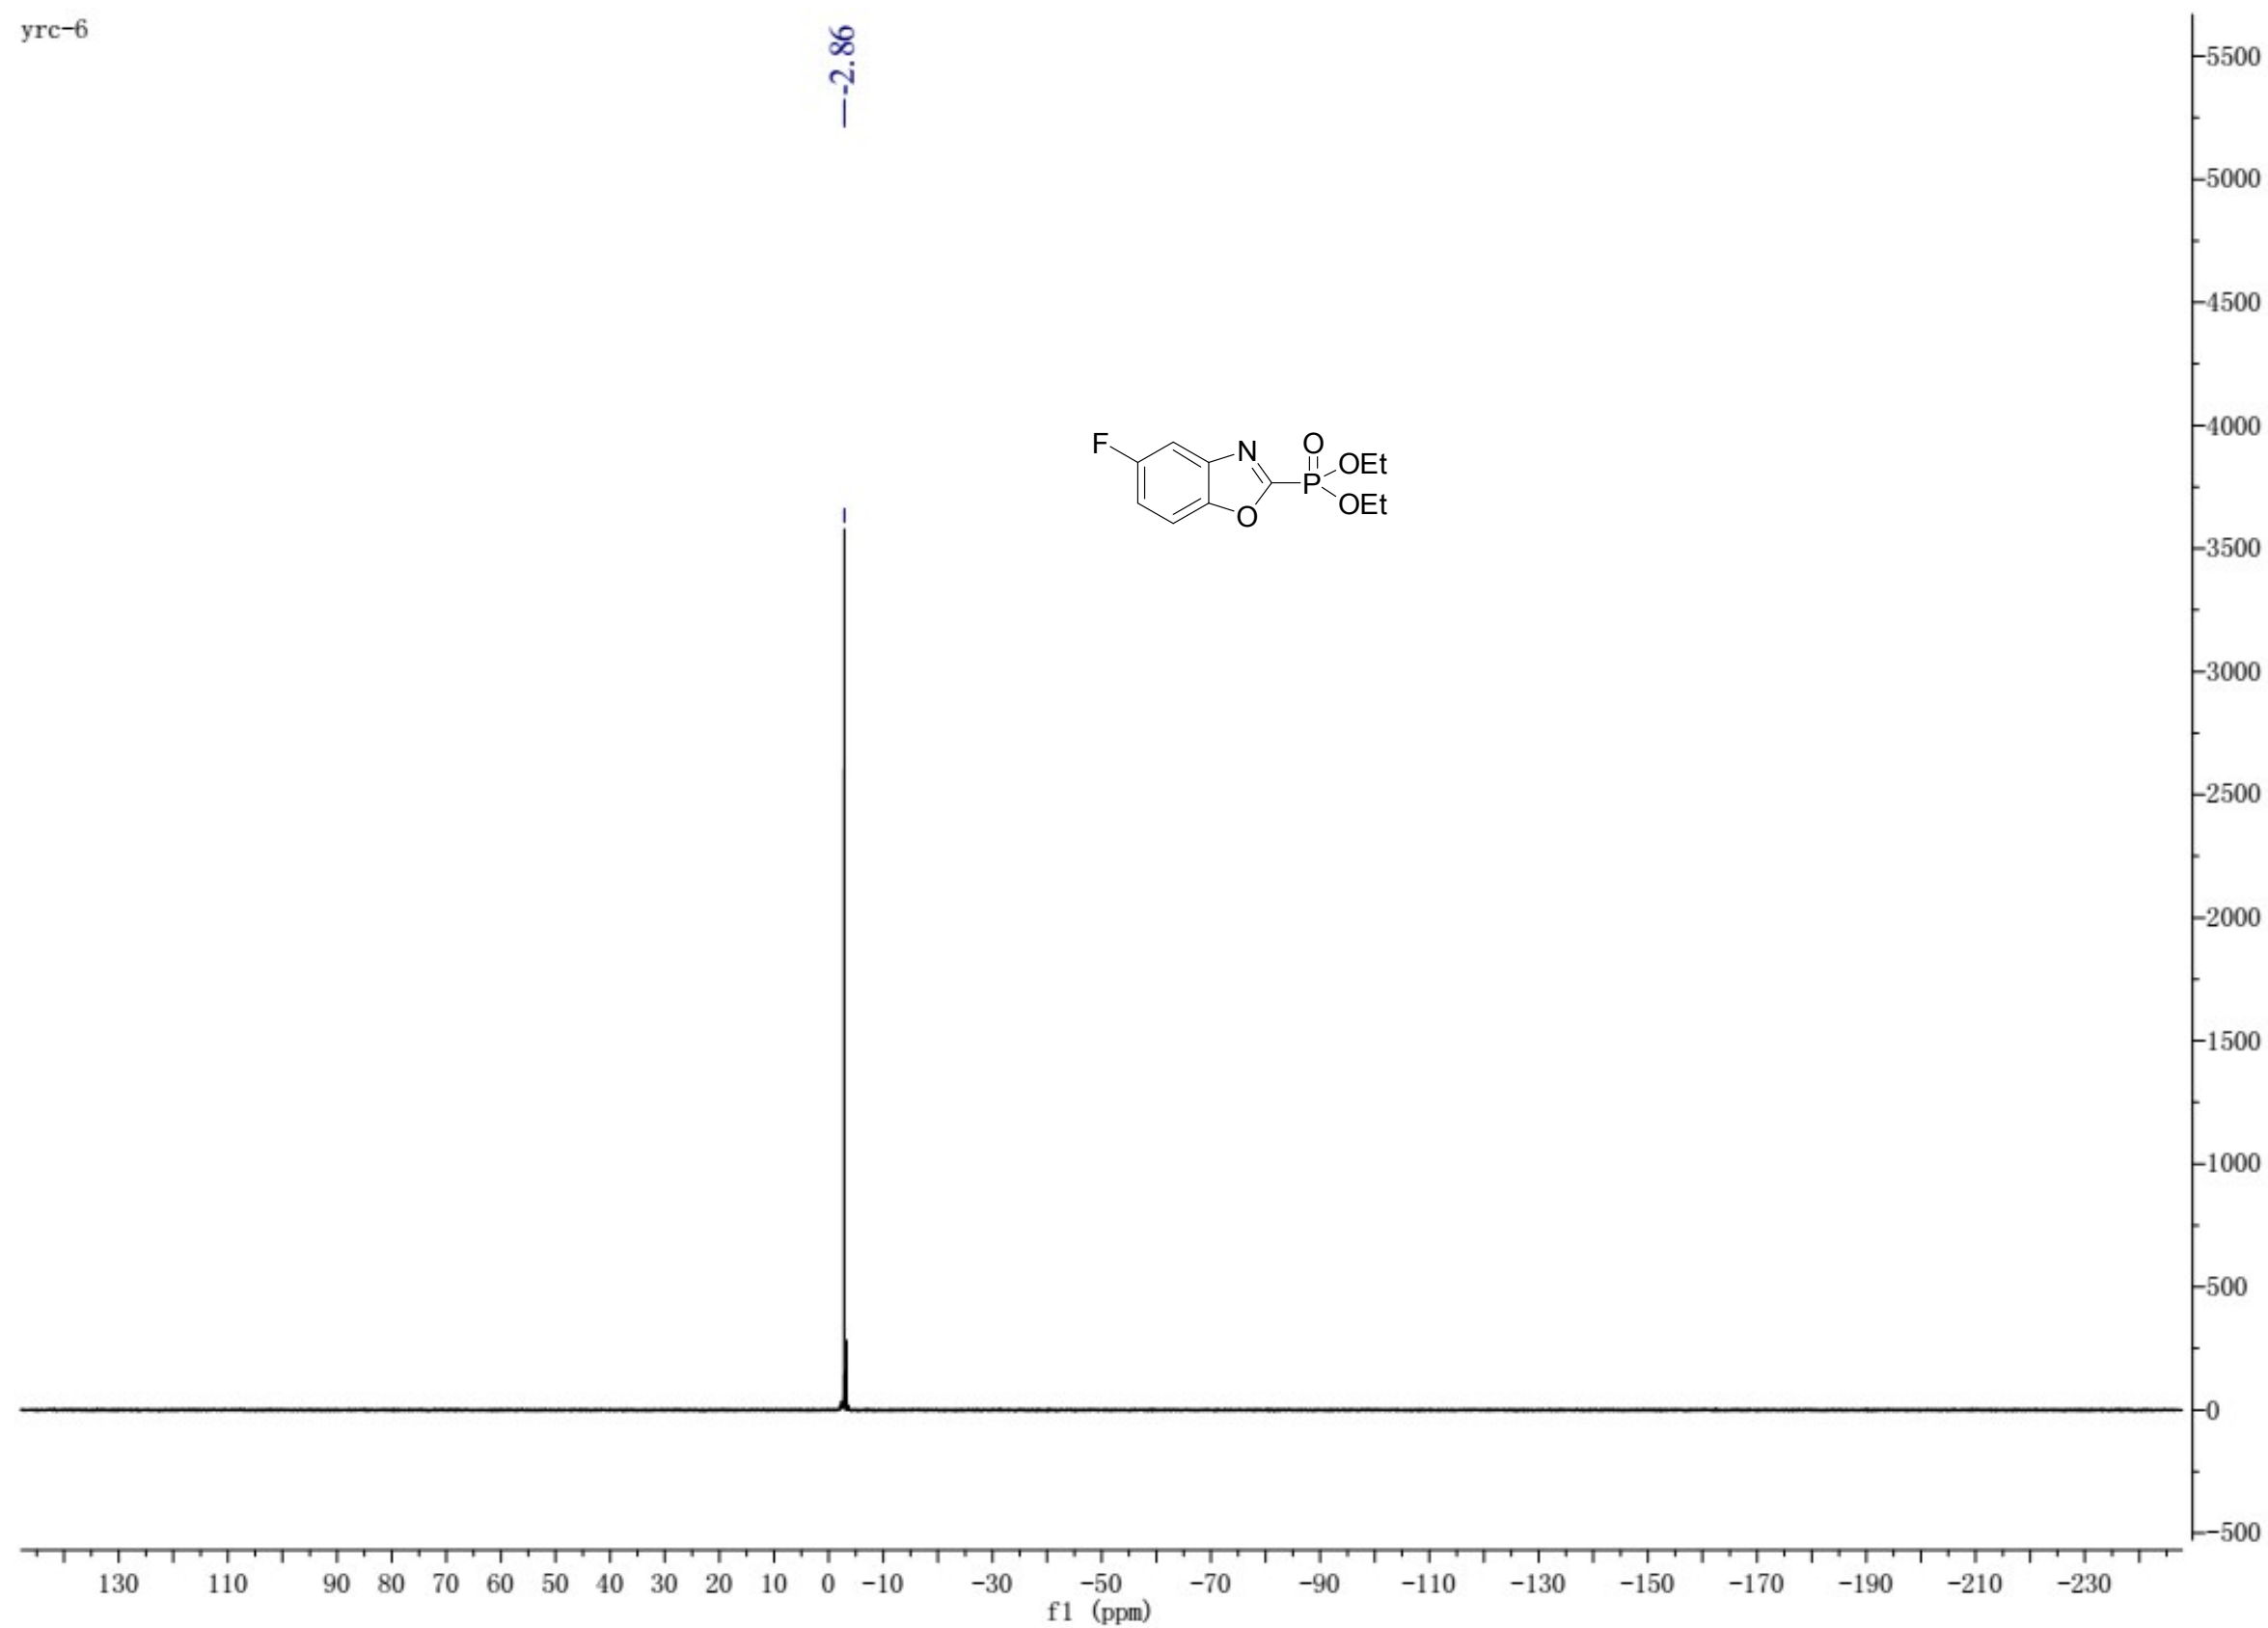

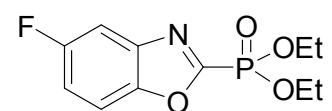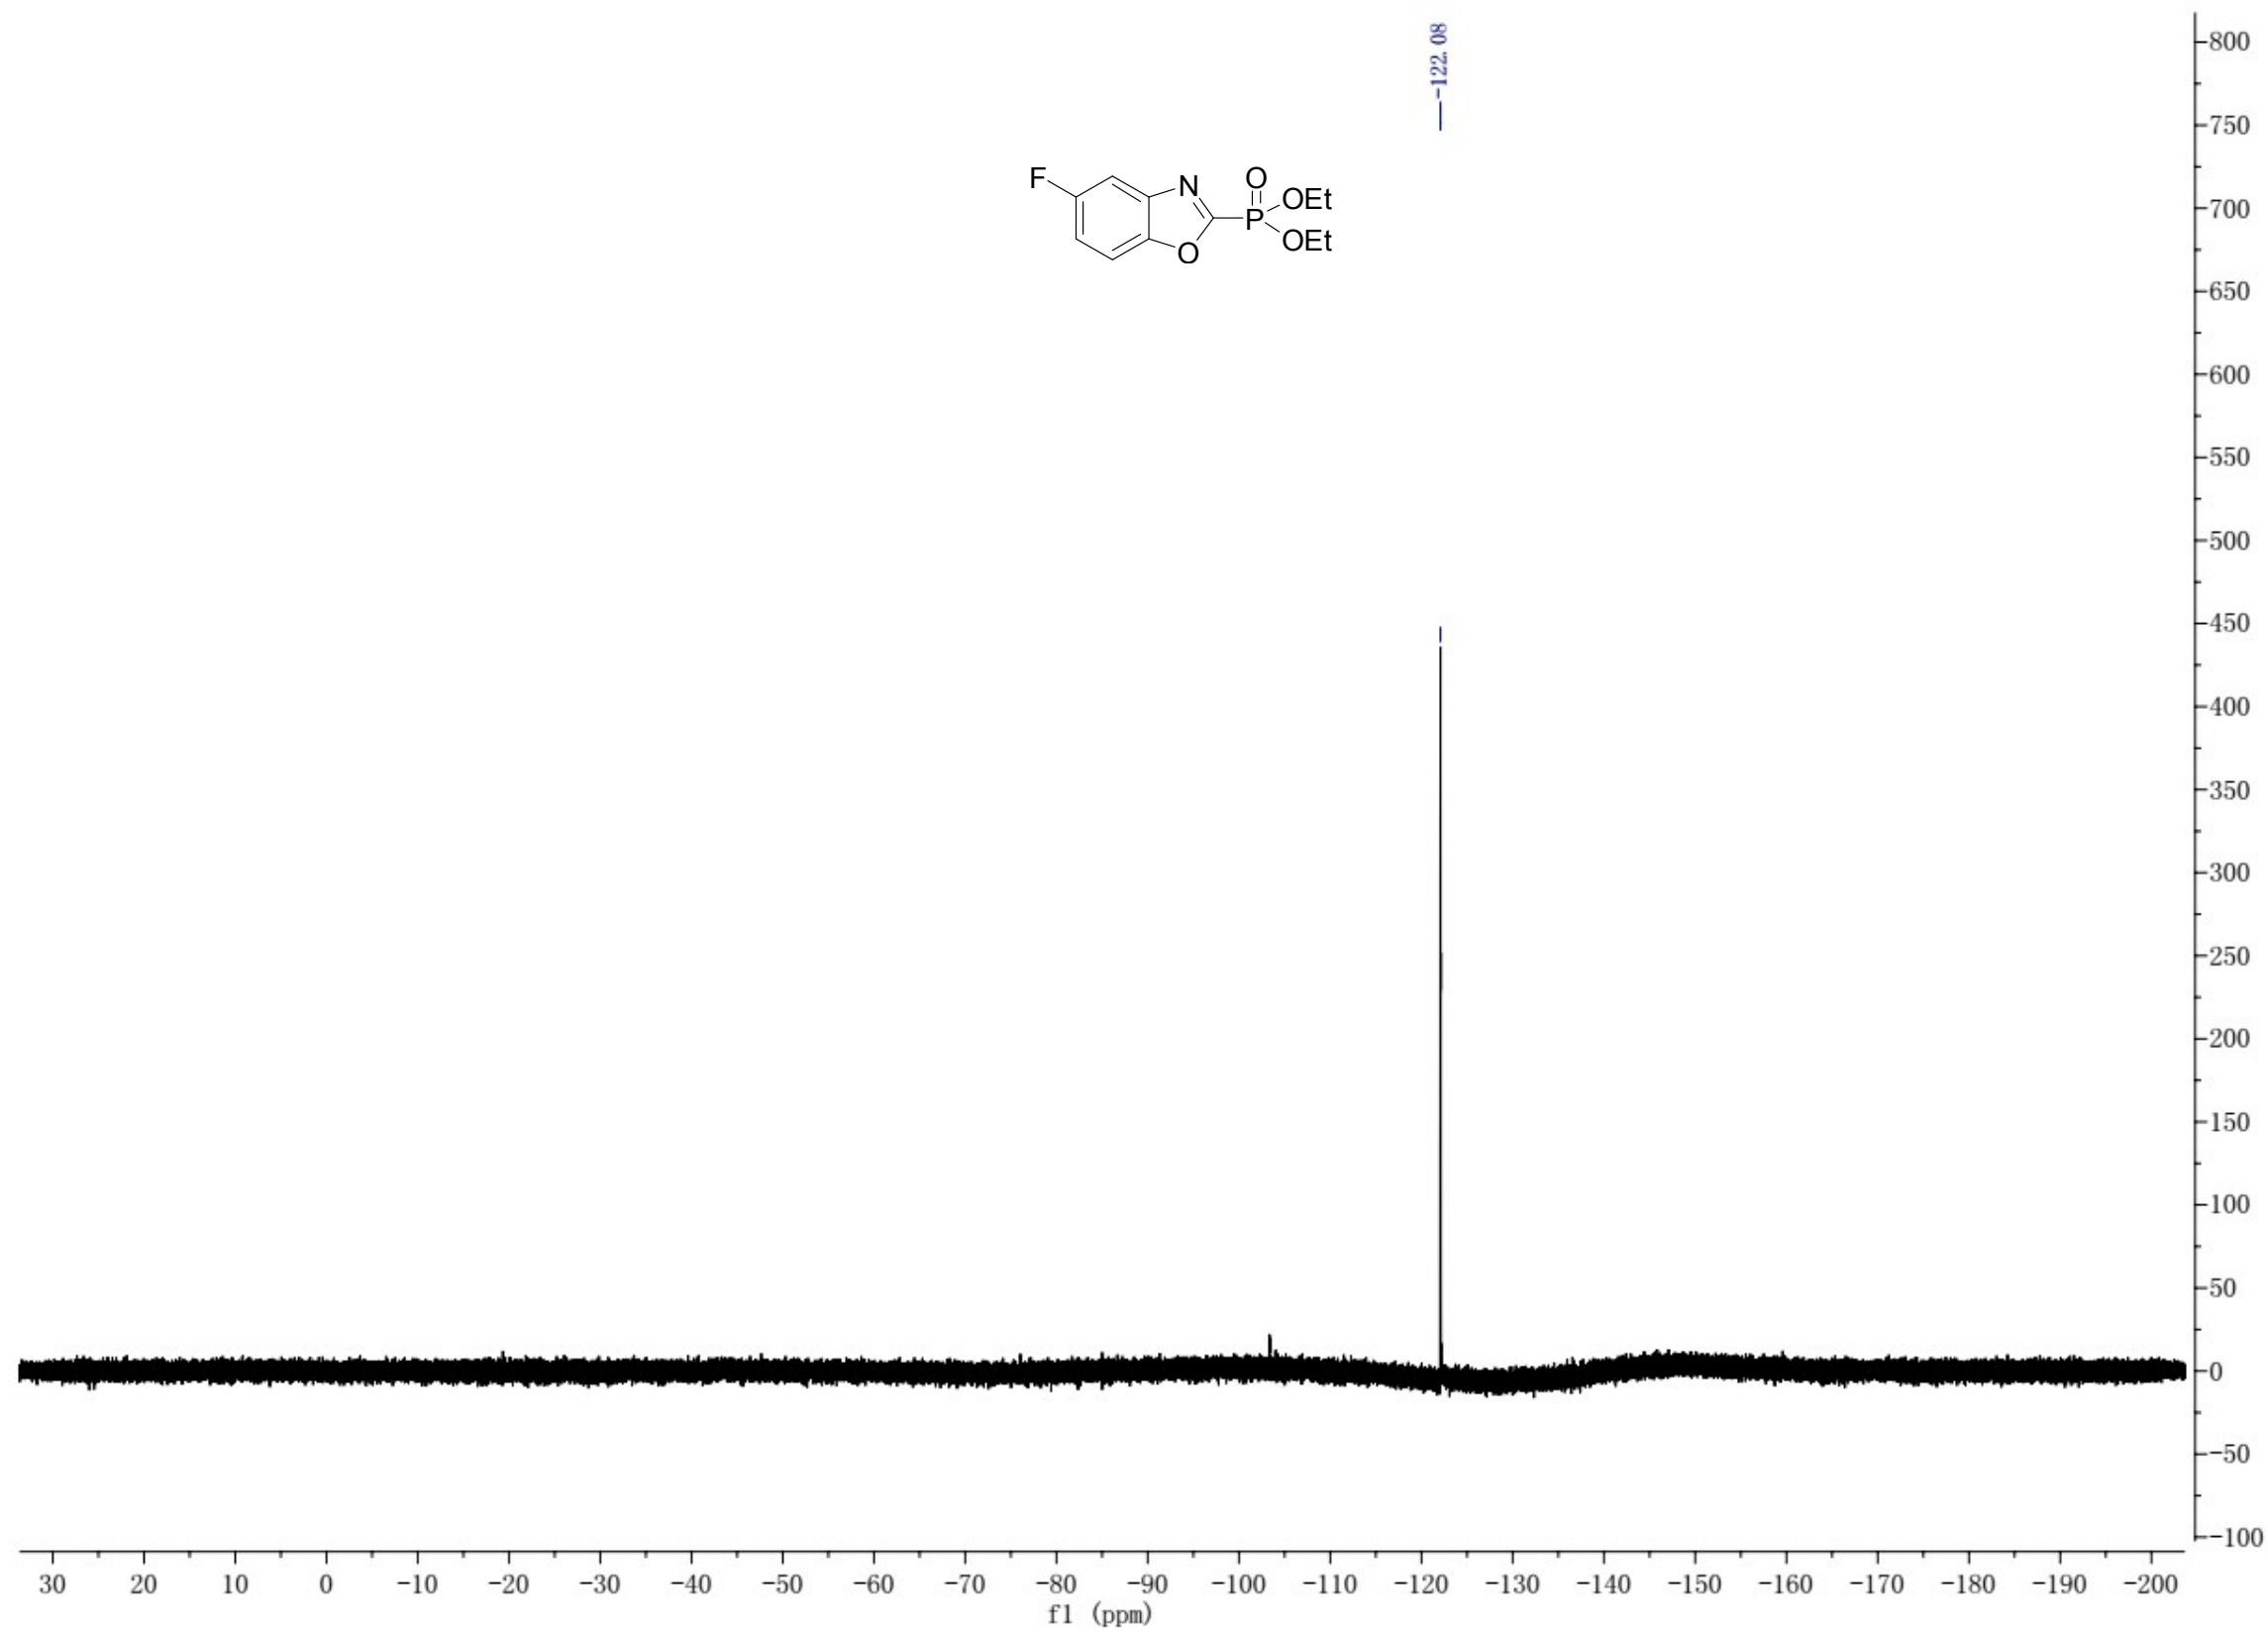

20141211-1H  
Gradient Shimming

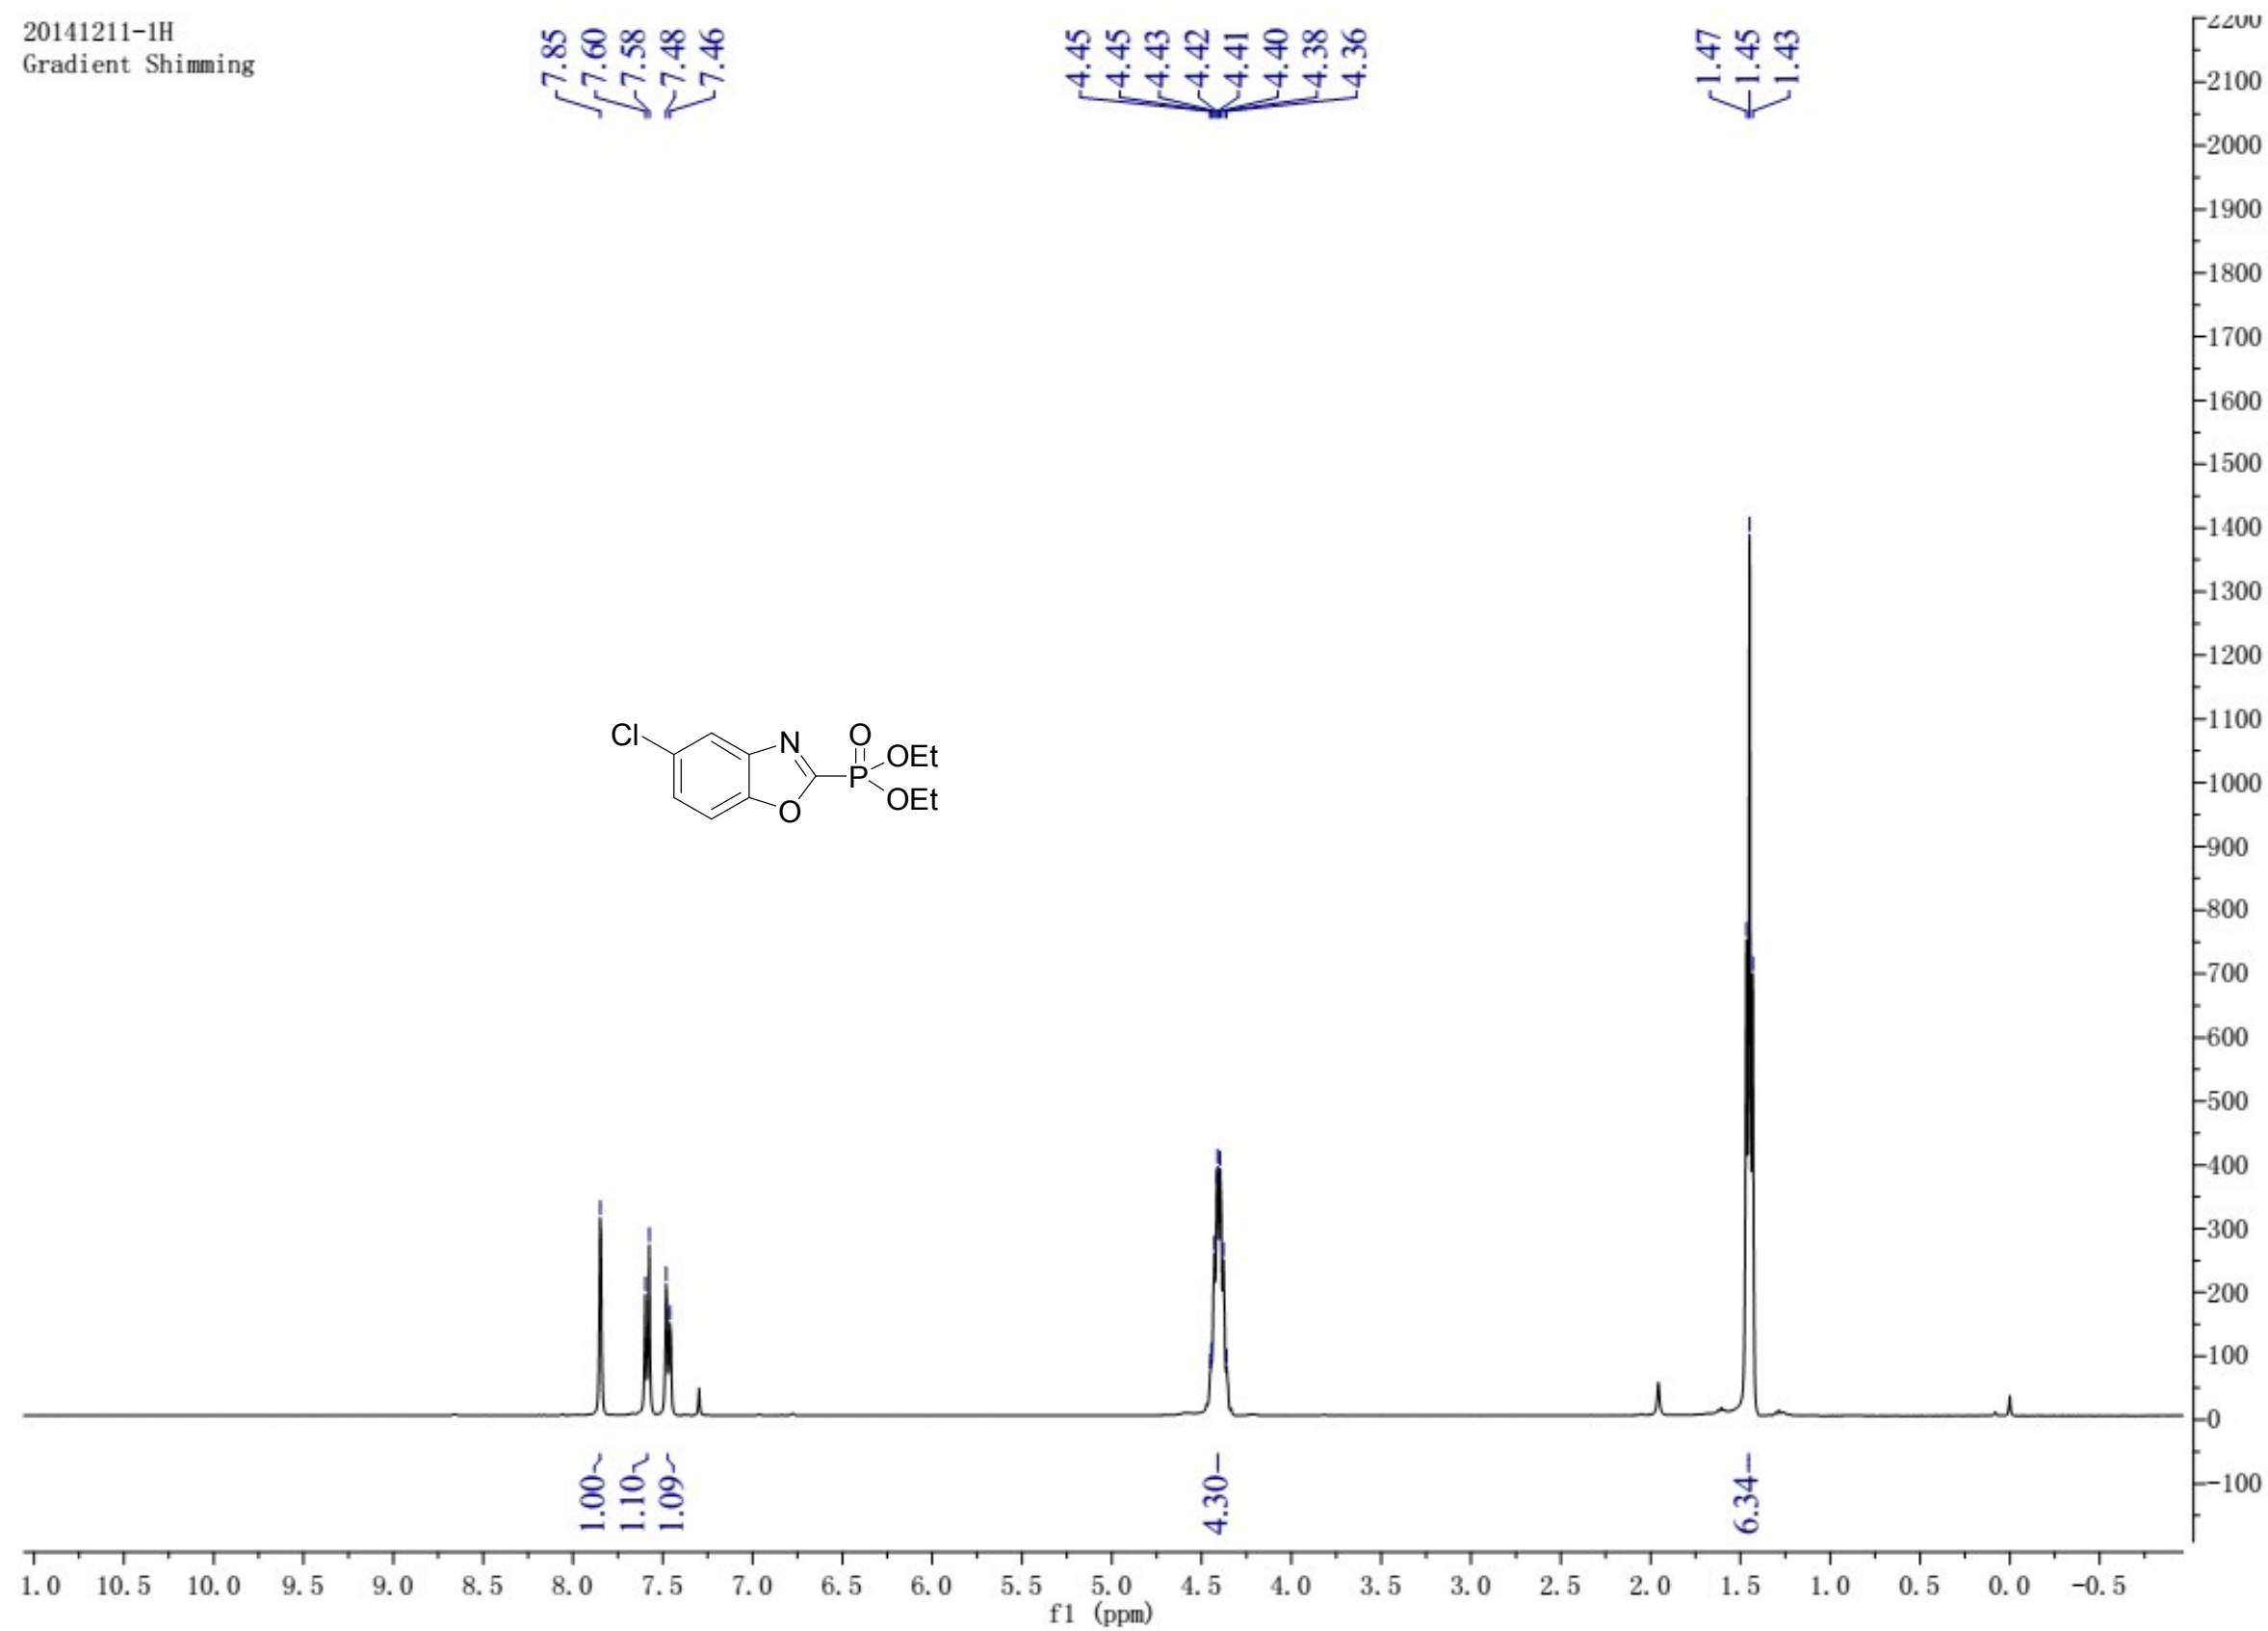

g-14-12-31-1  
STANDARD CARBON PARAMETERS

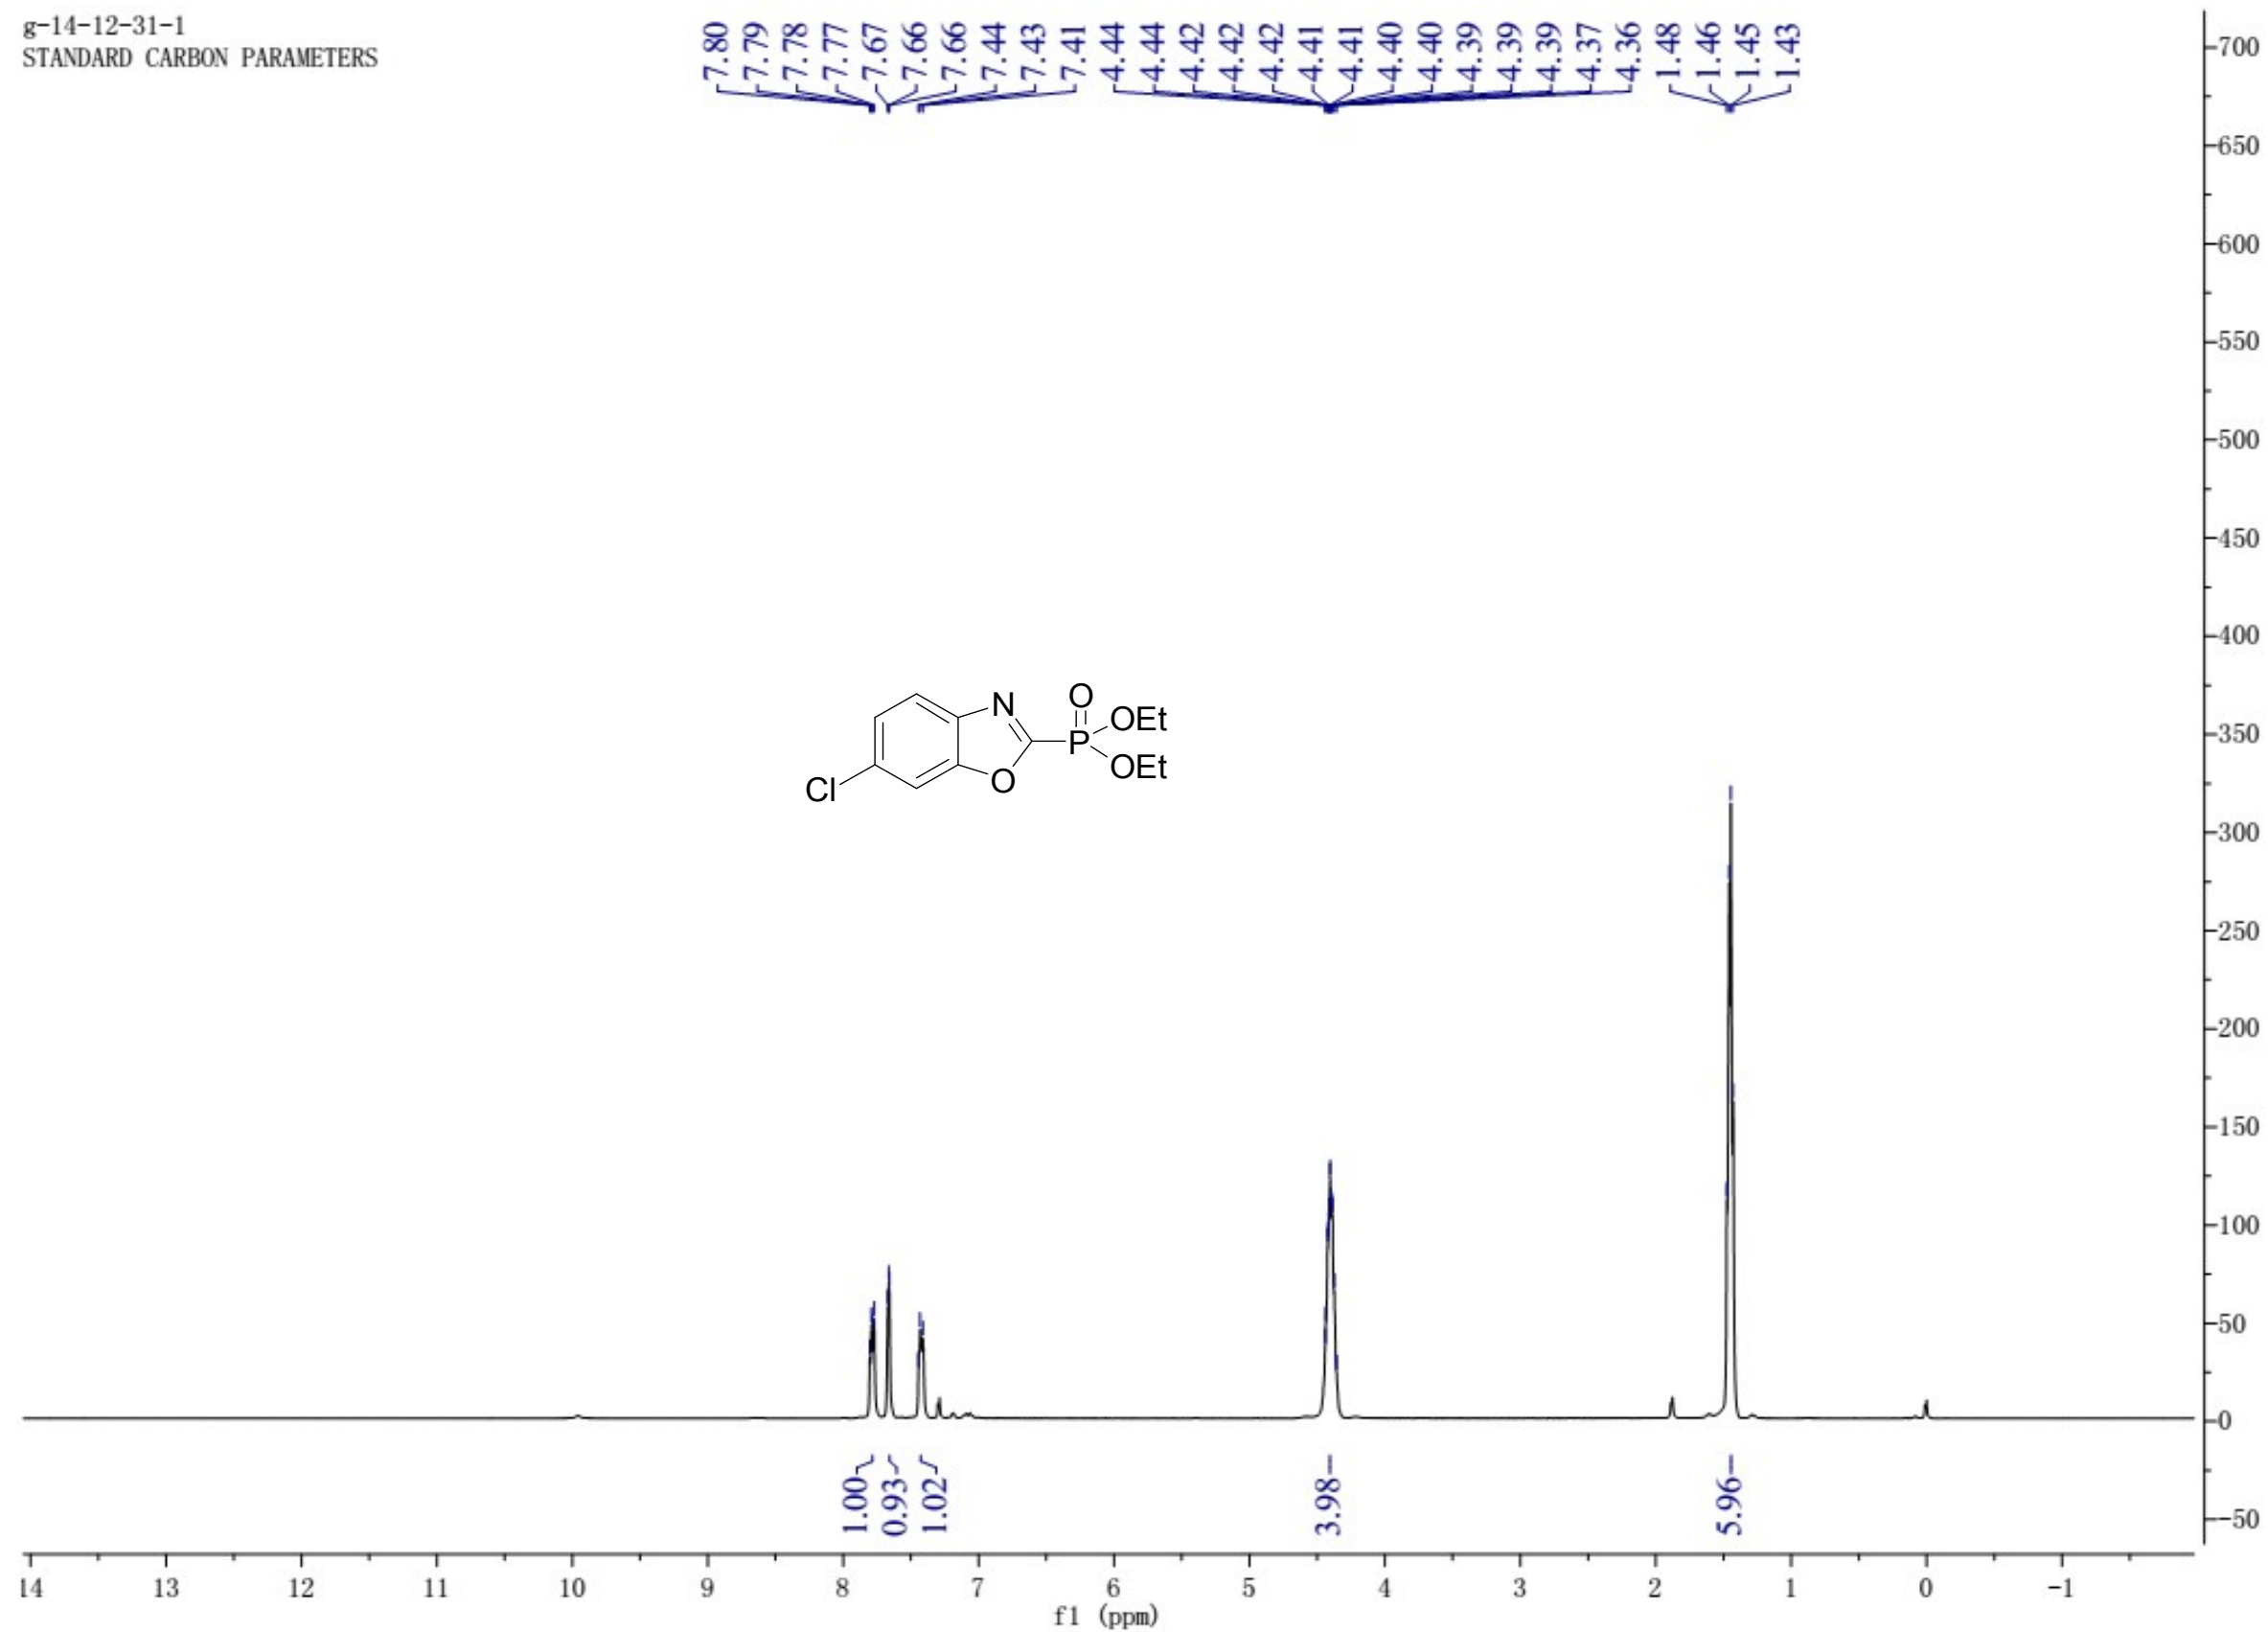

Y150059  
sample9 13C

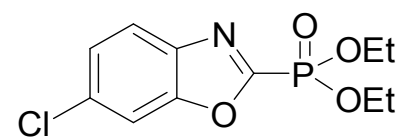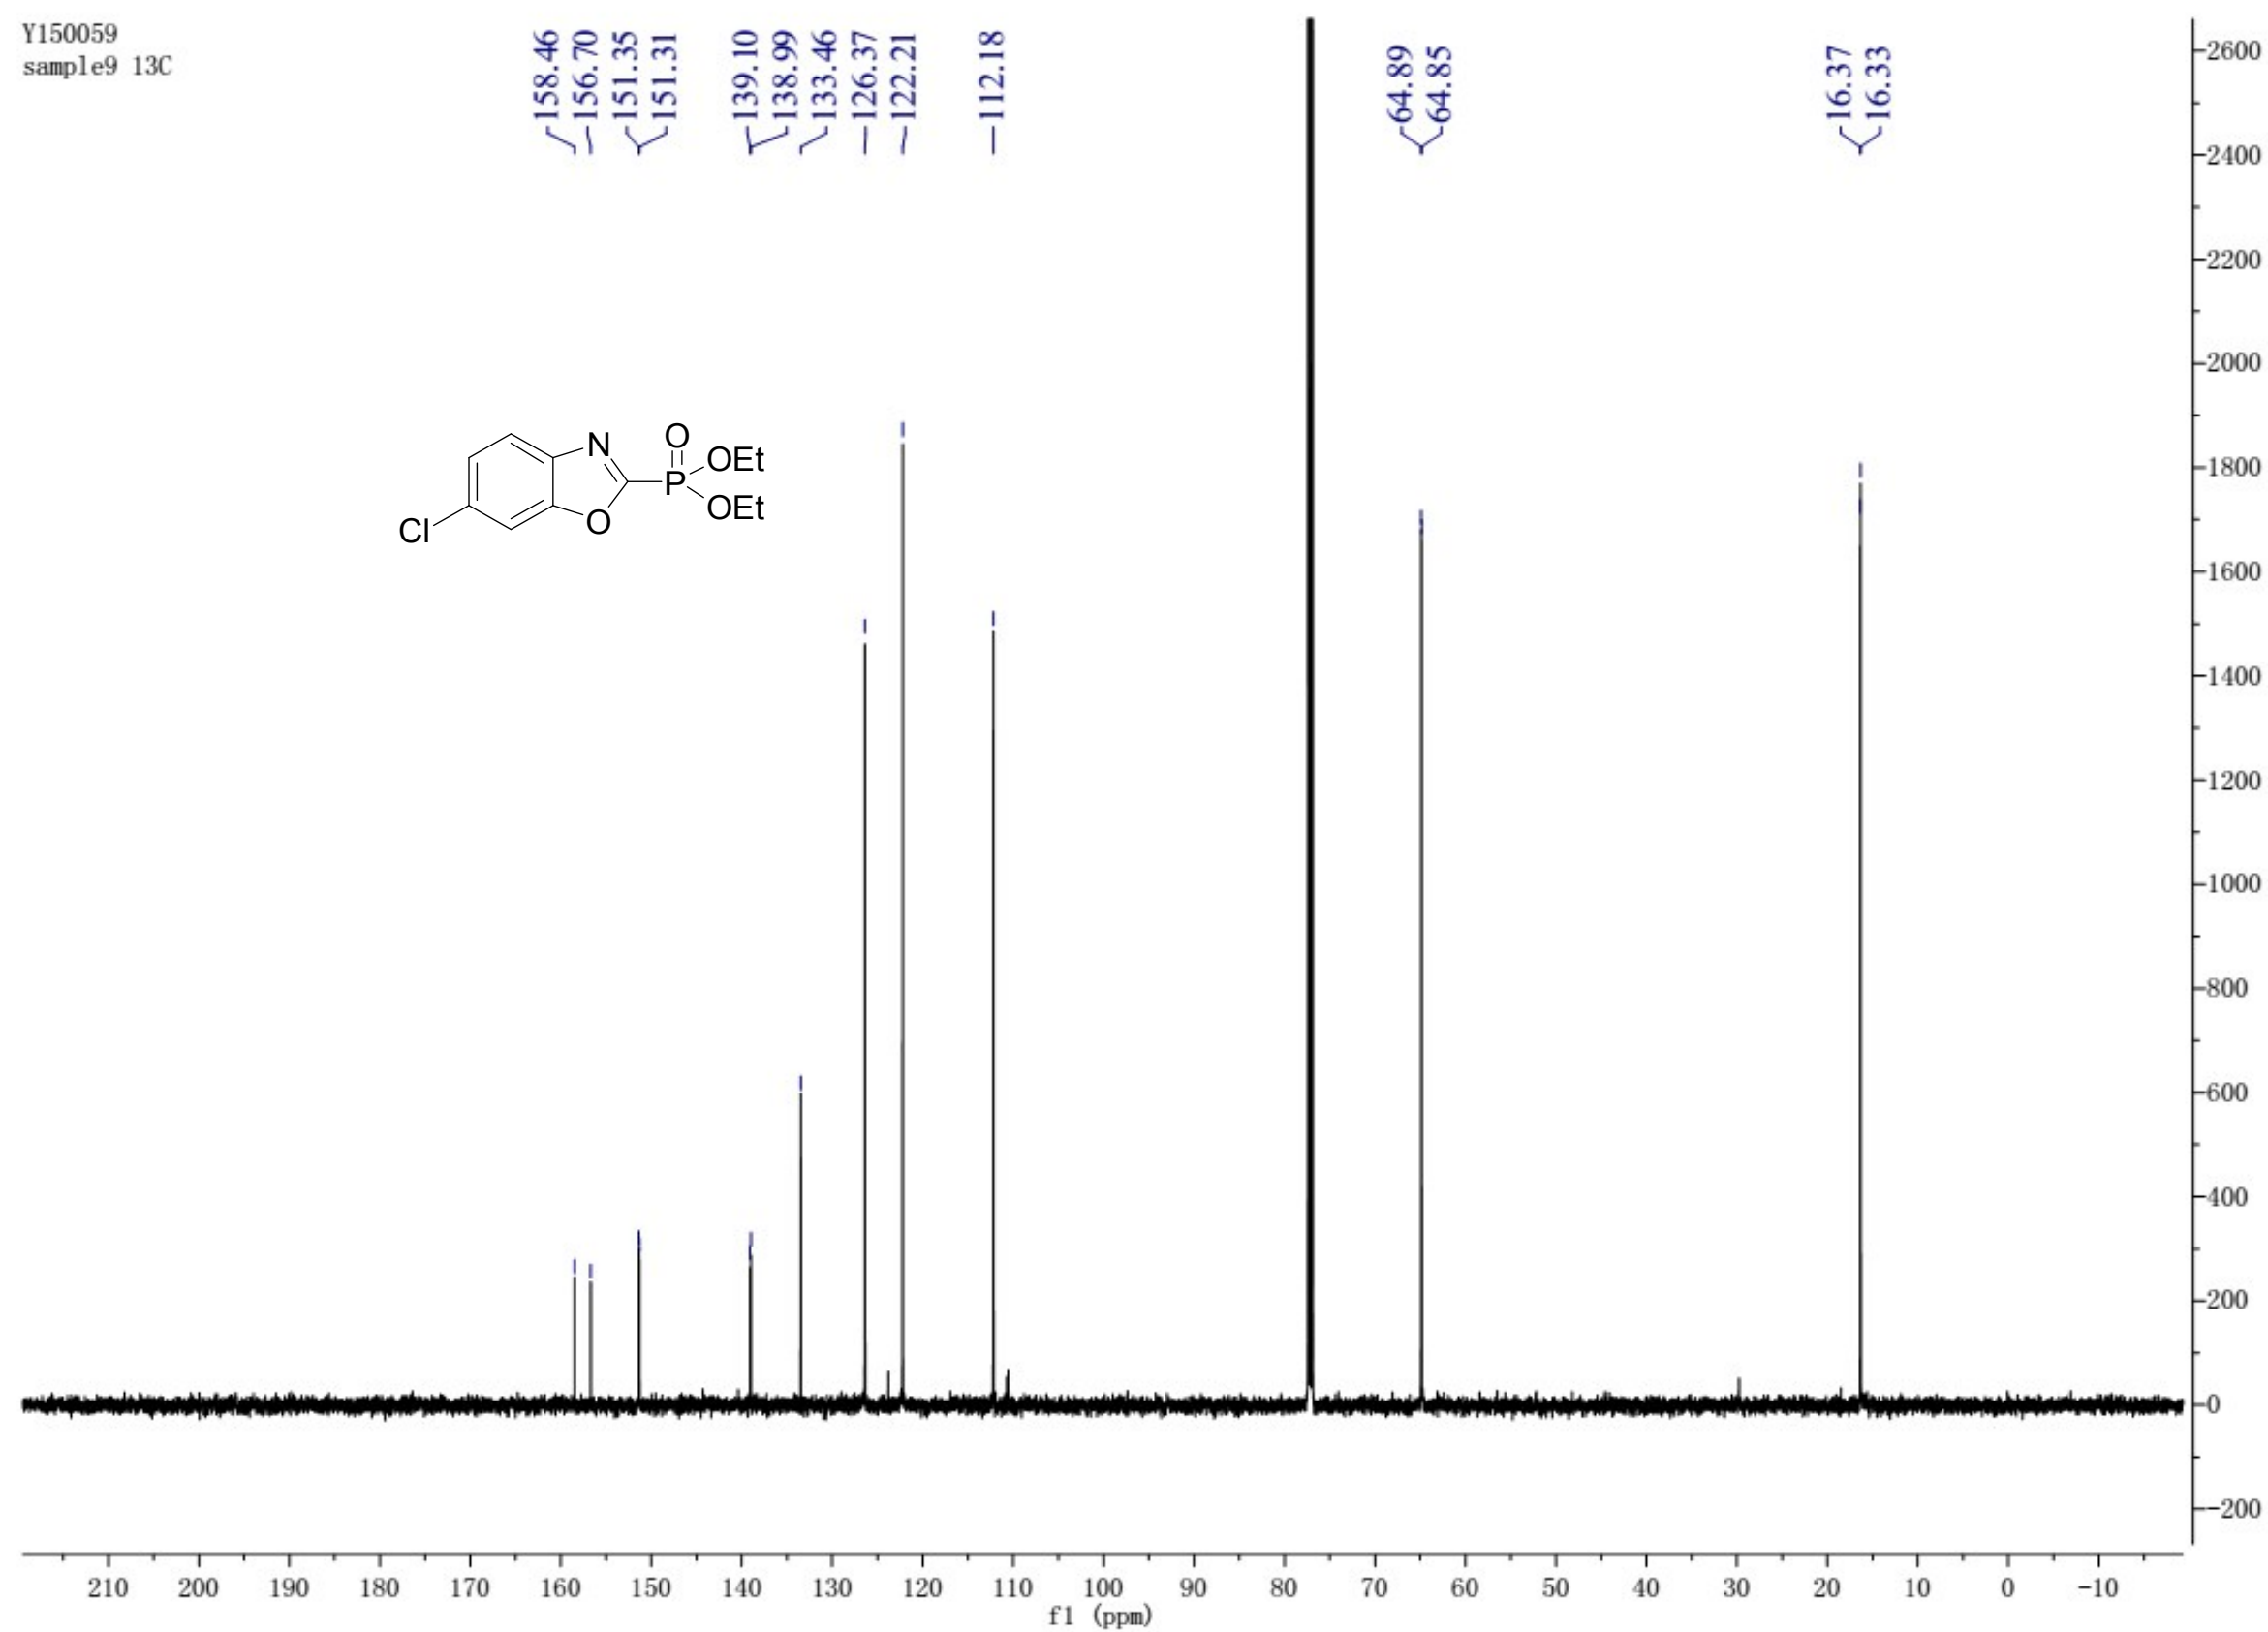

yr3-3

-2.86

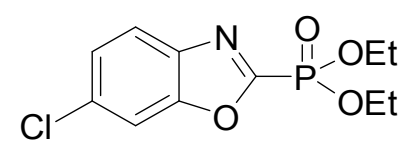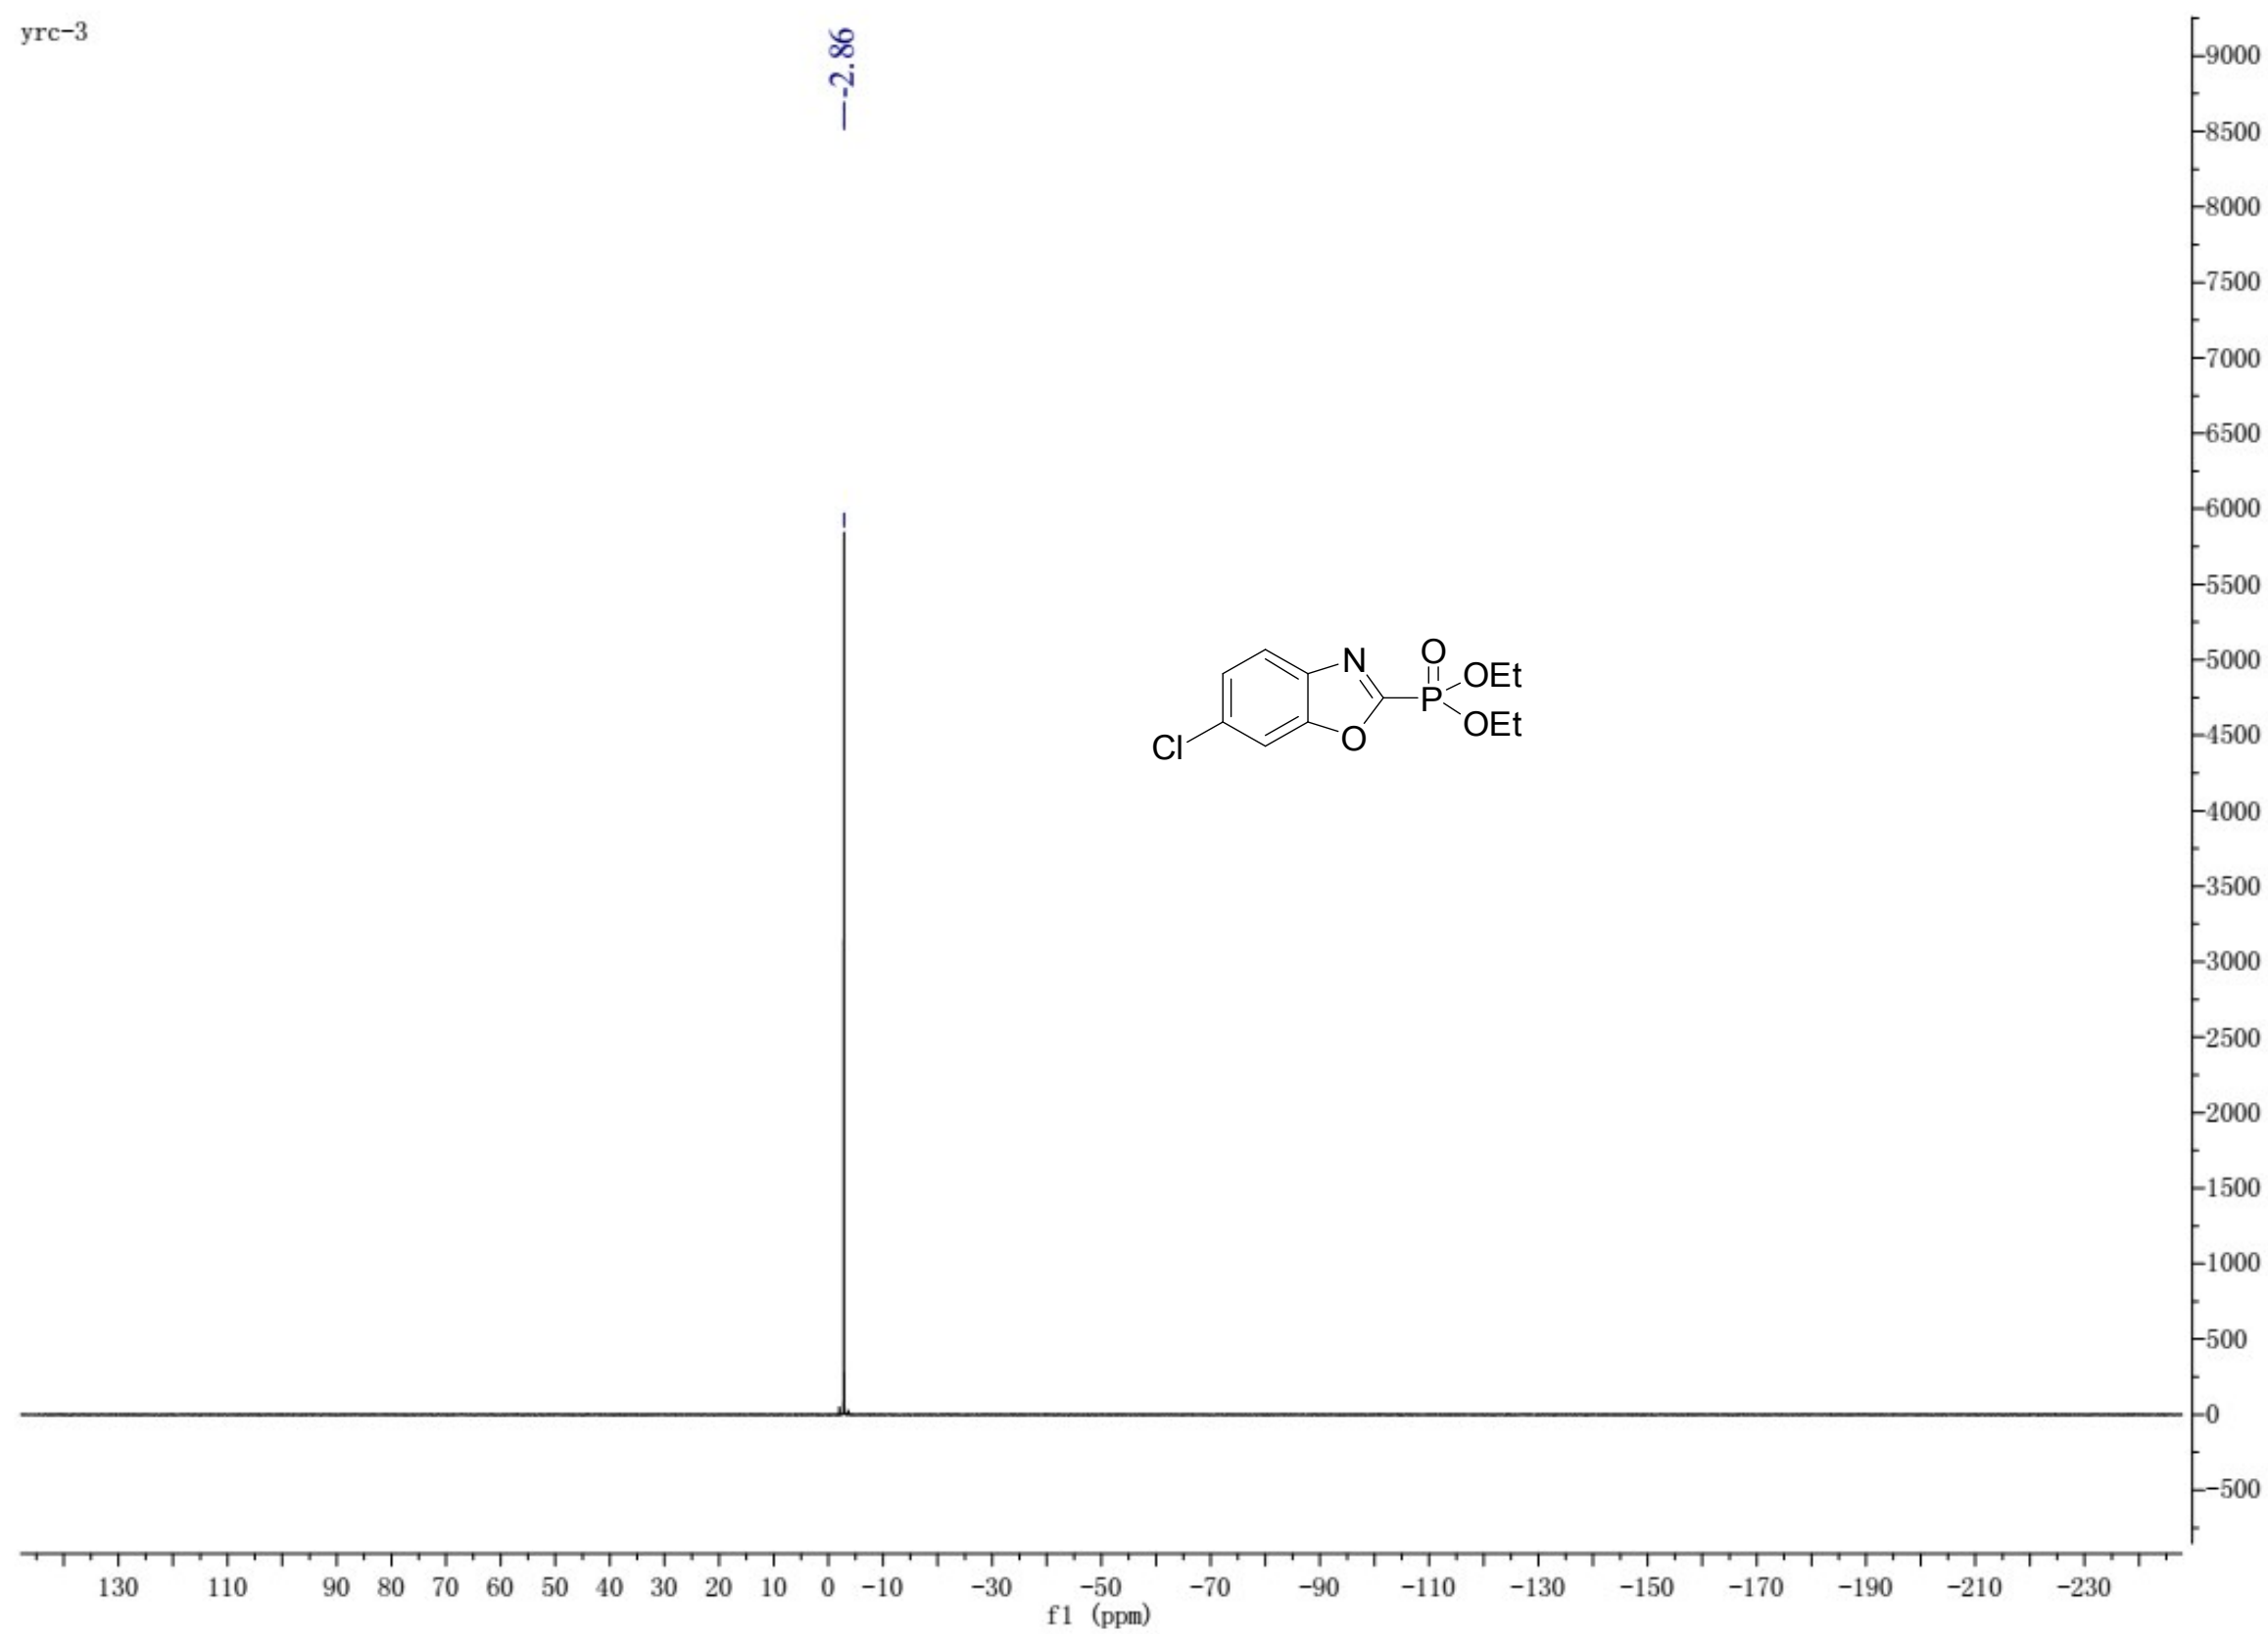

3  
Gradient Shimming

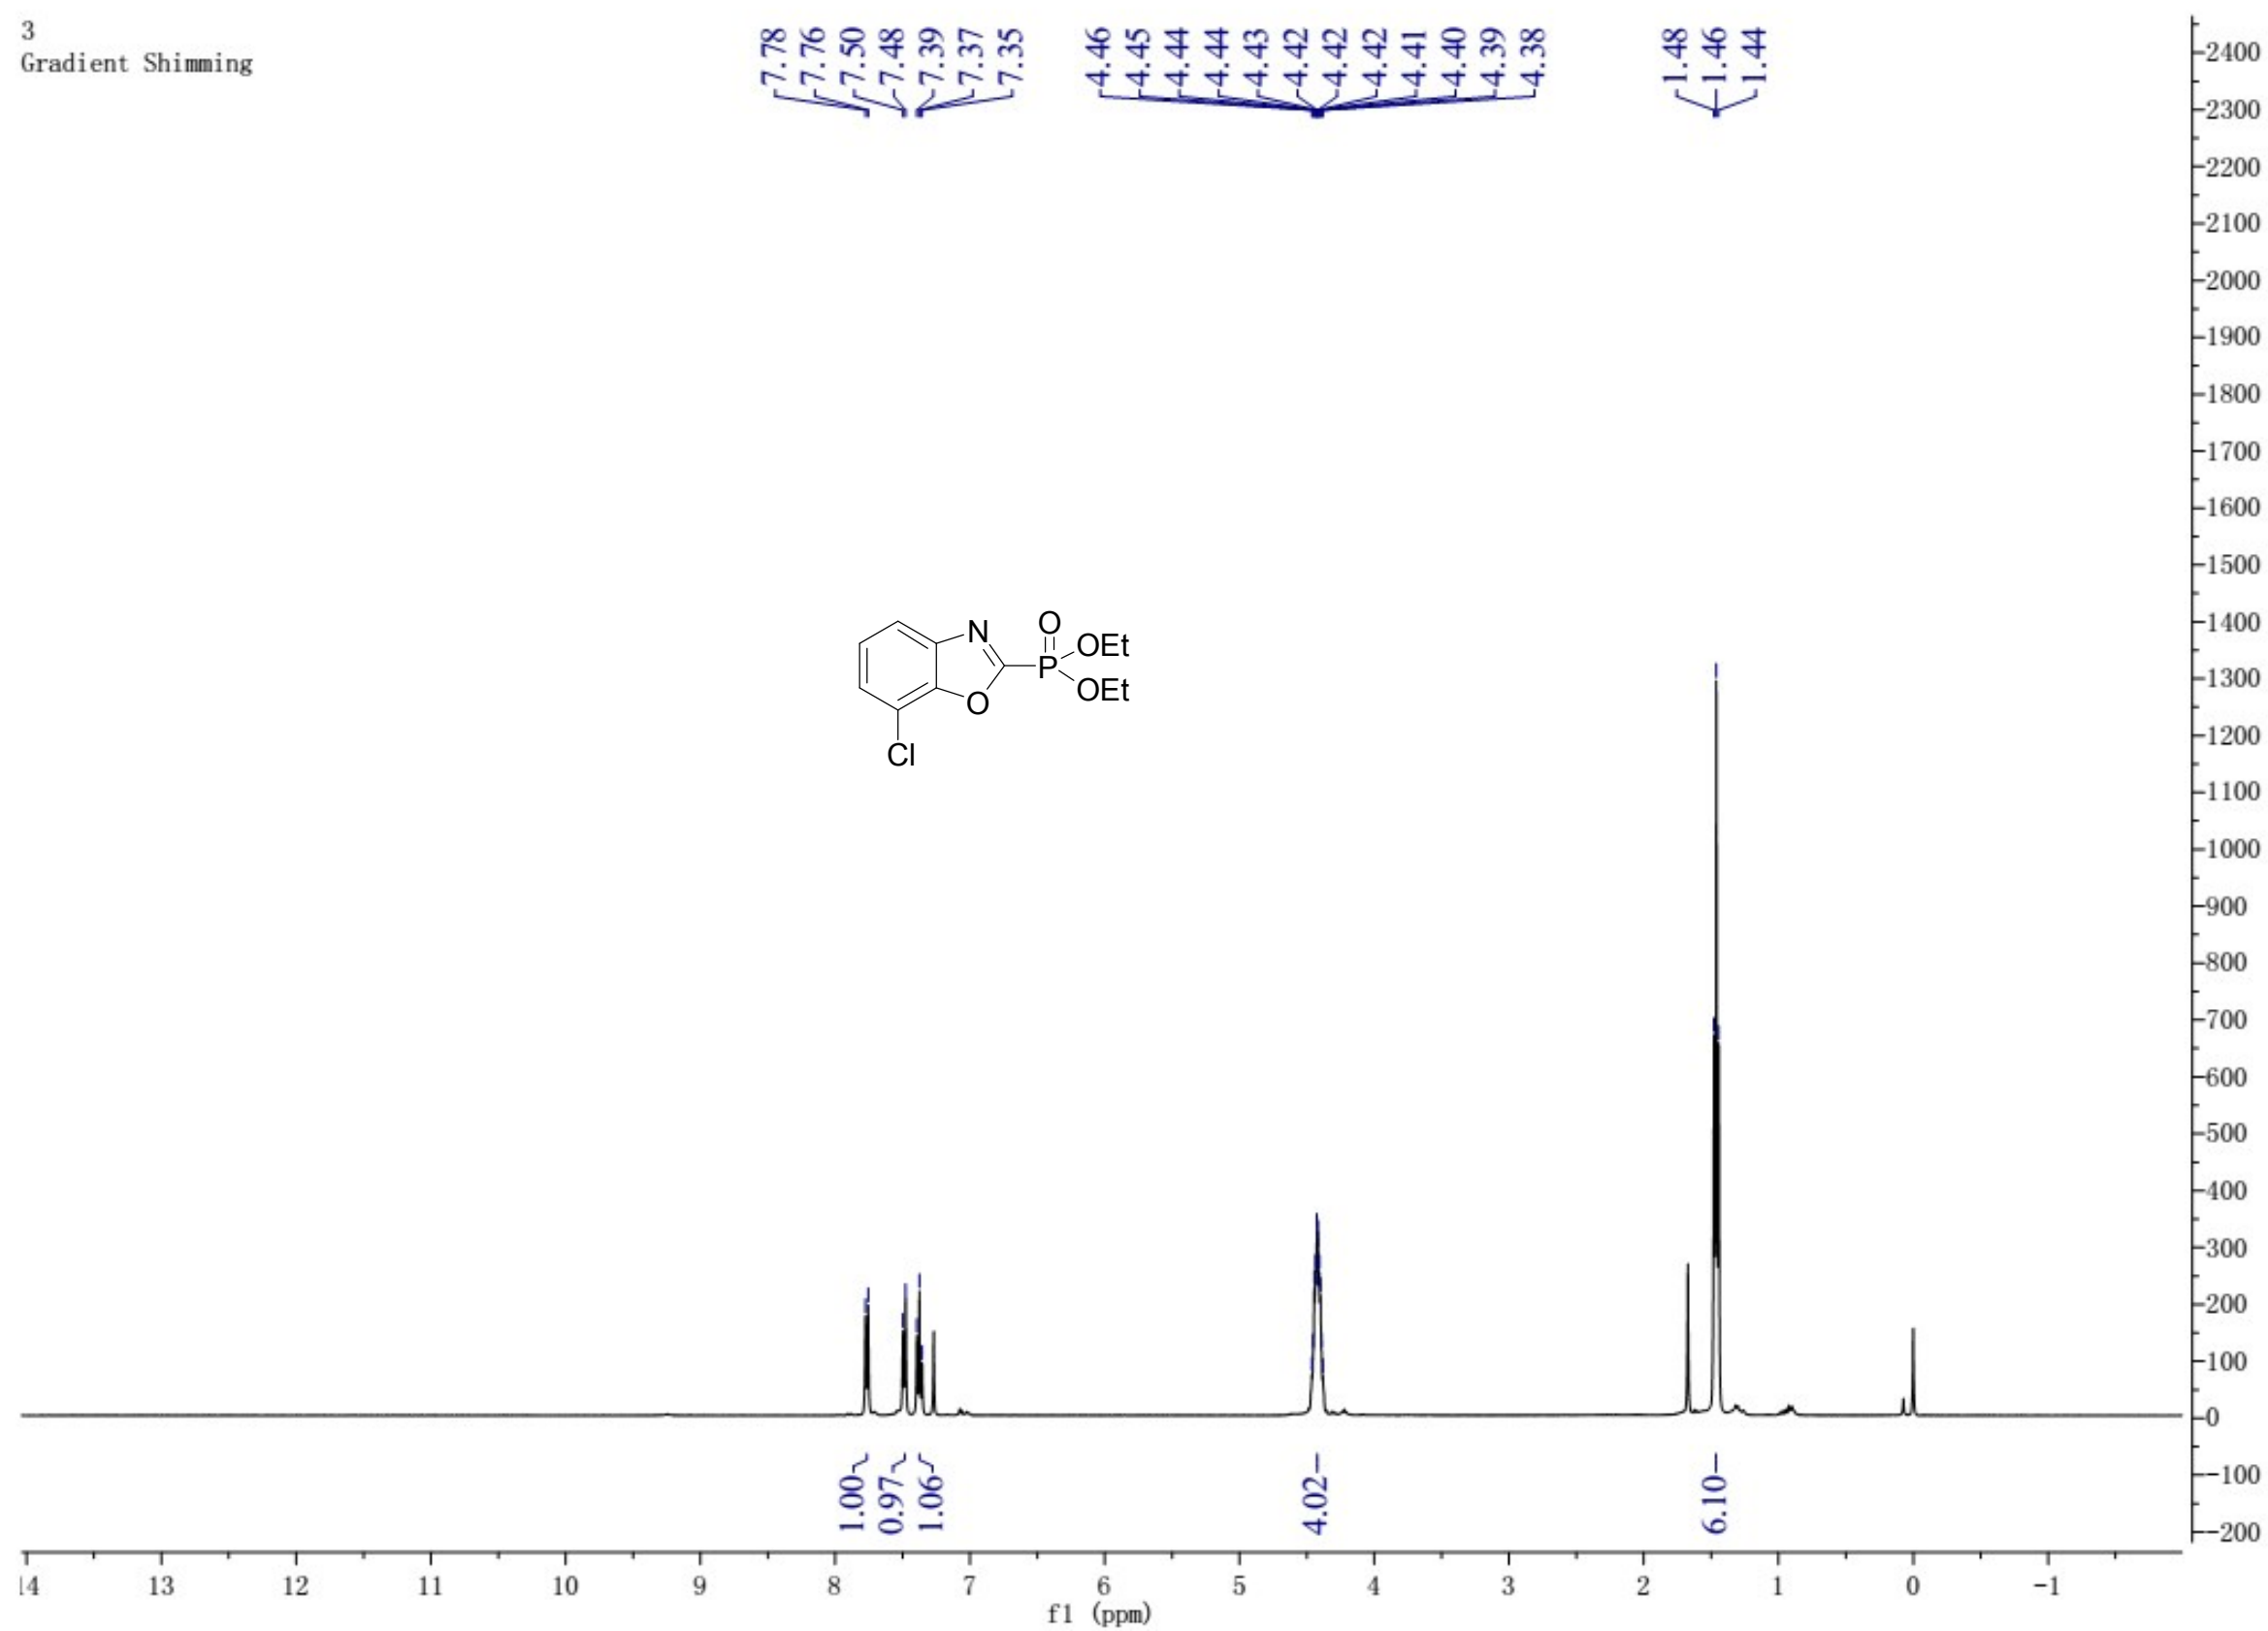

Y150059  
sample14 13C

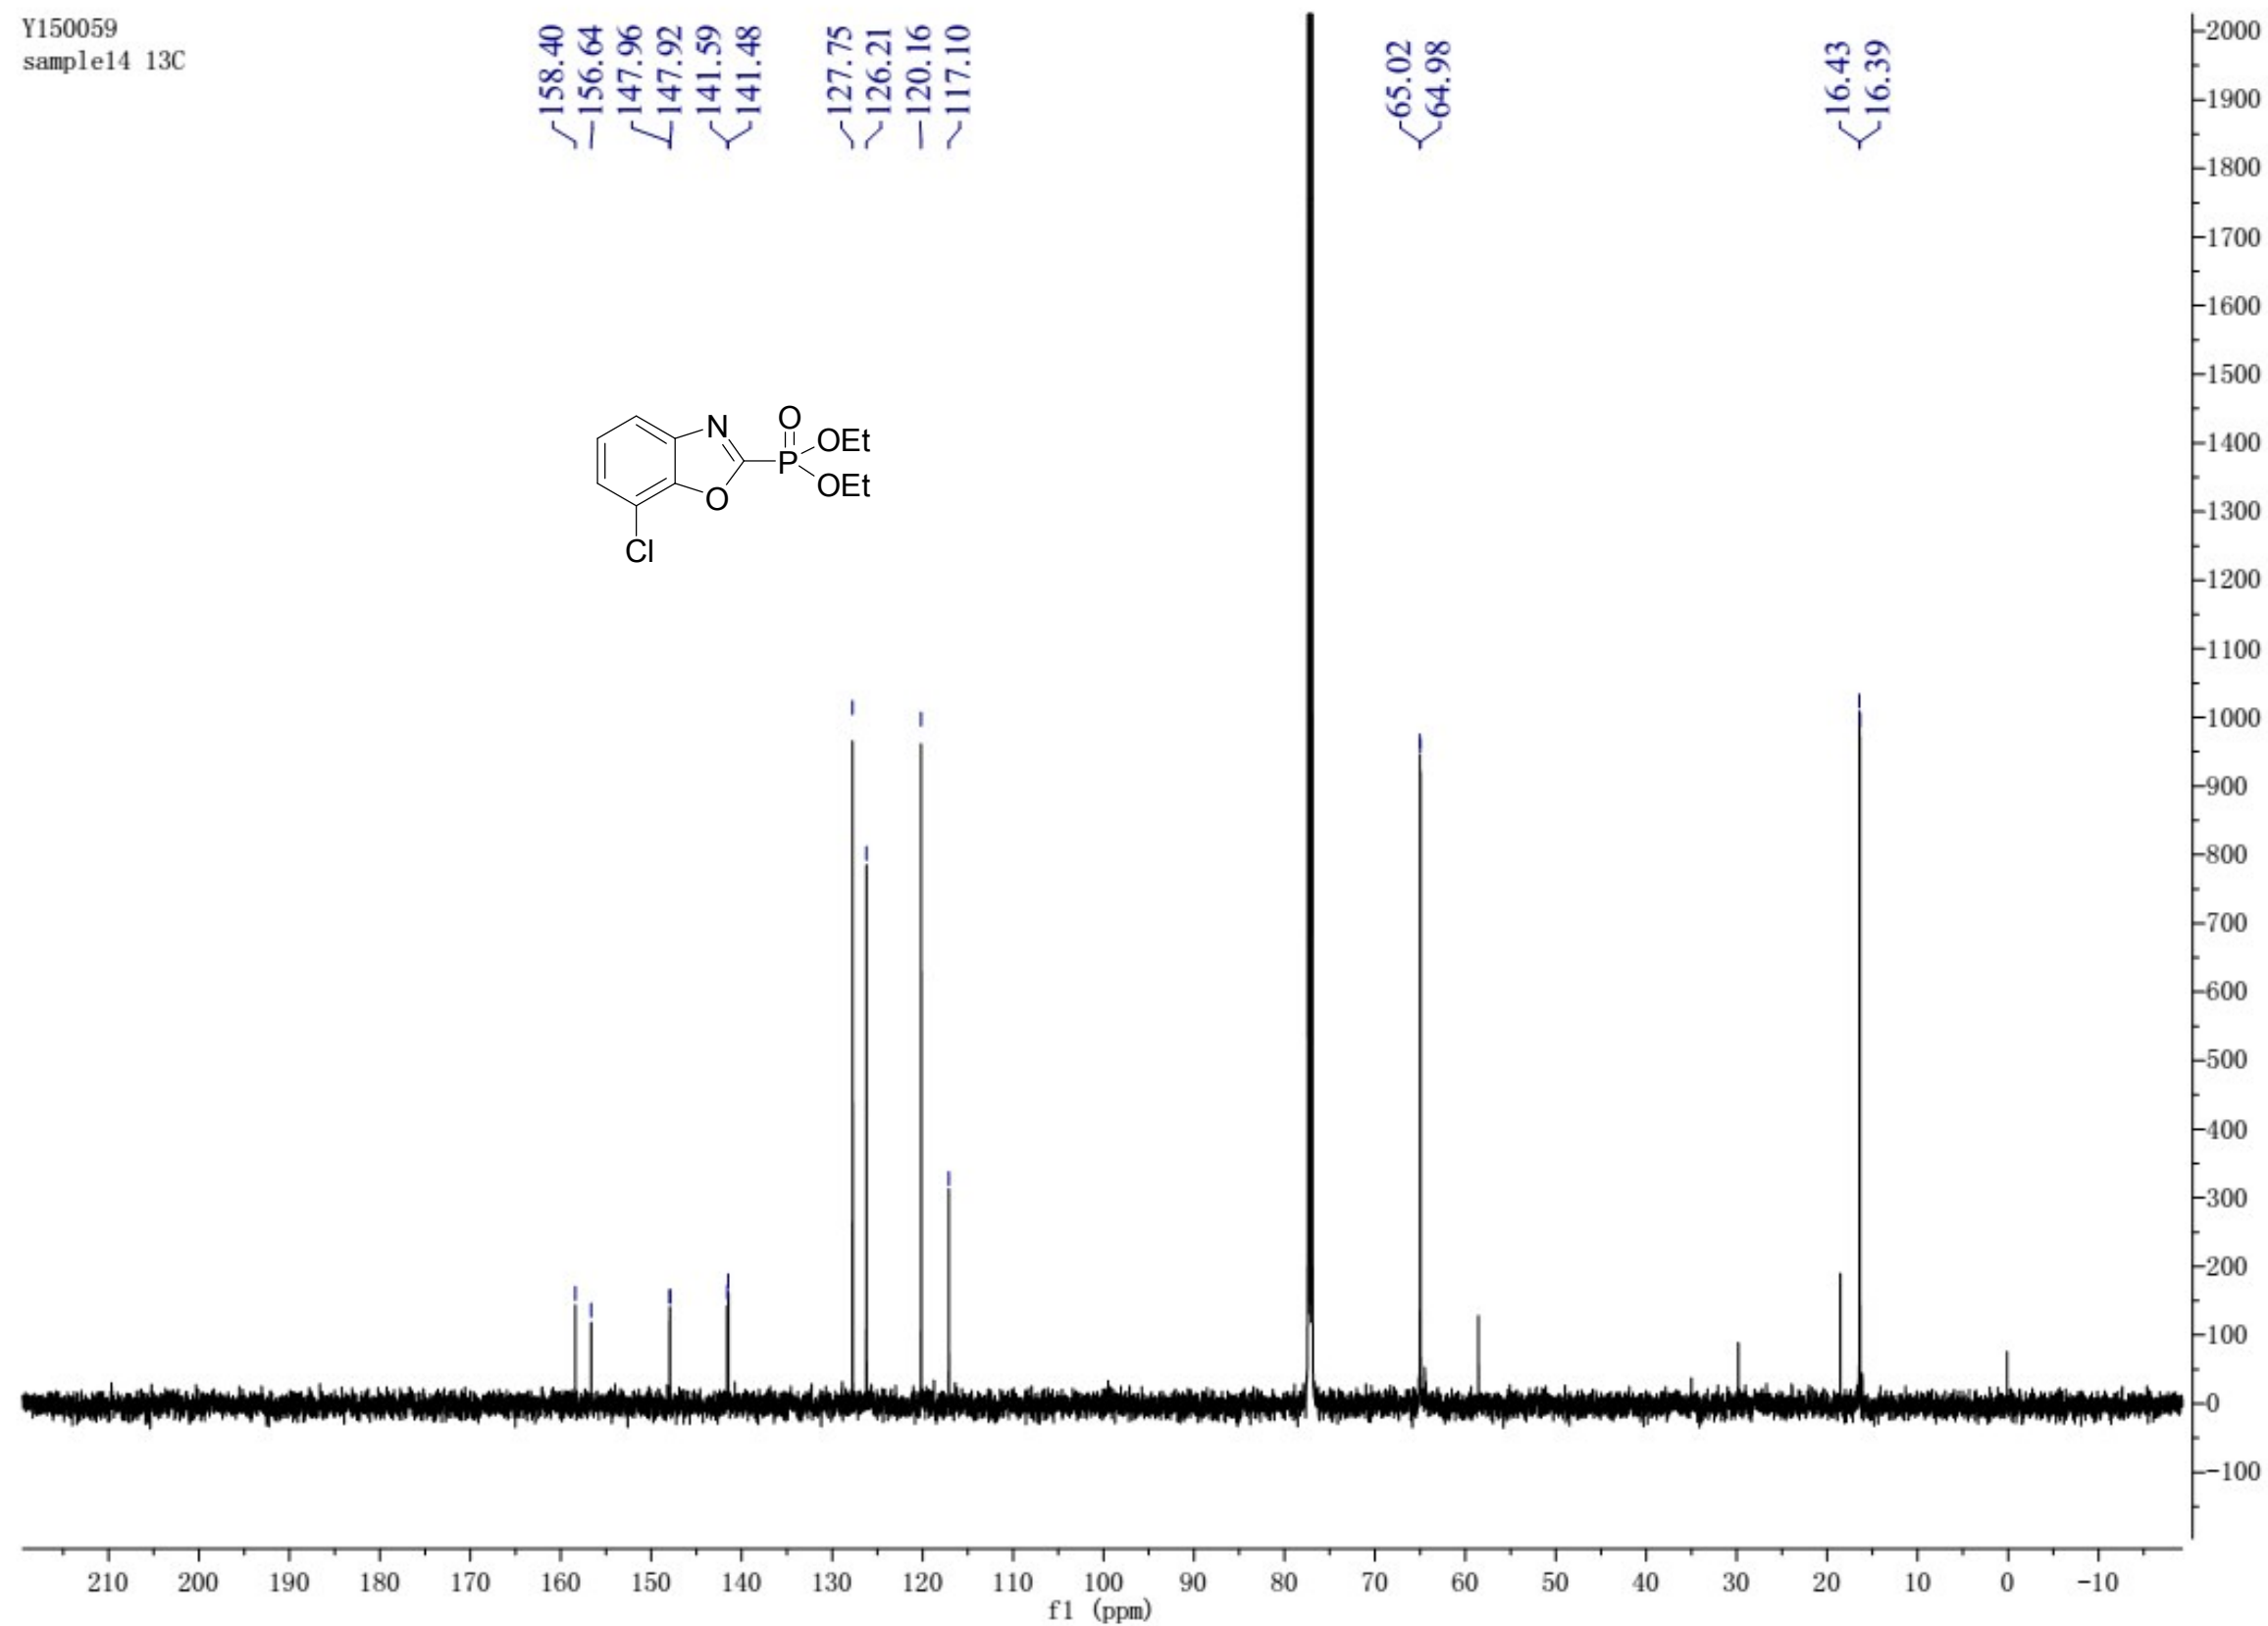

yr-5

3.10

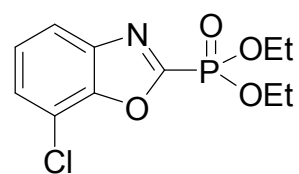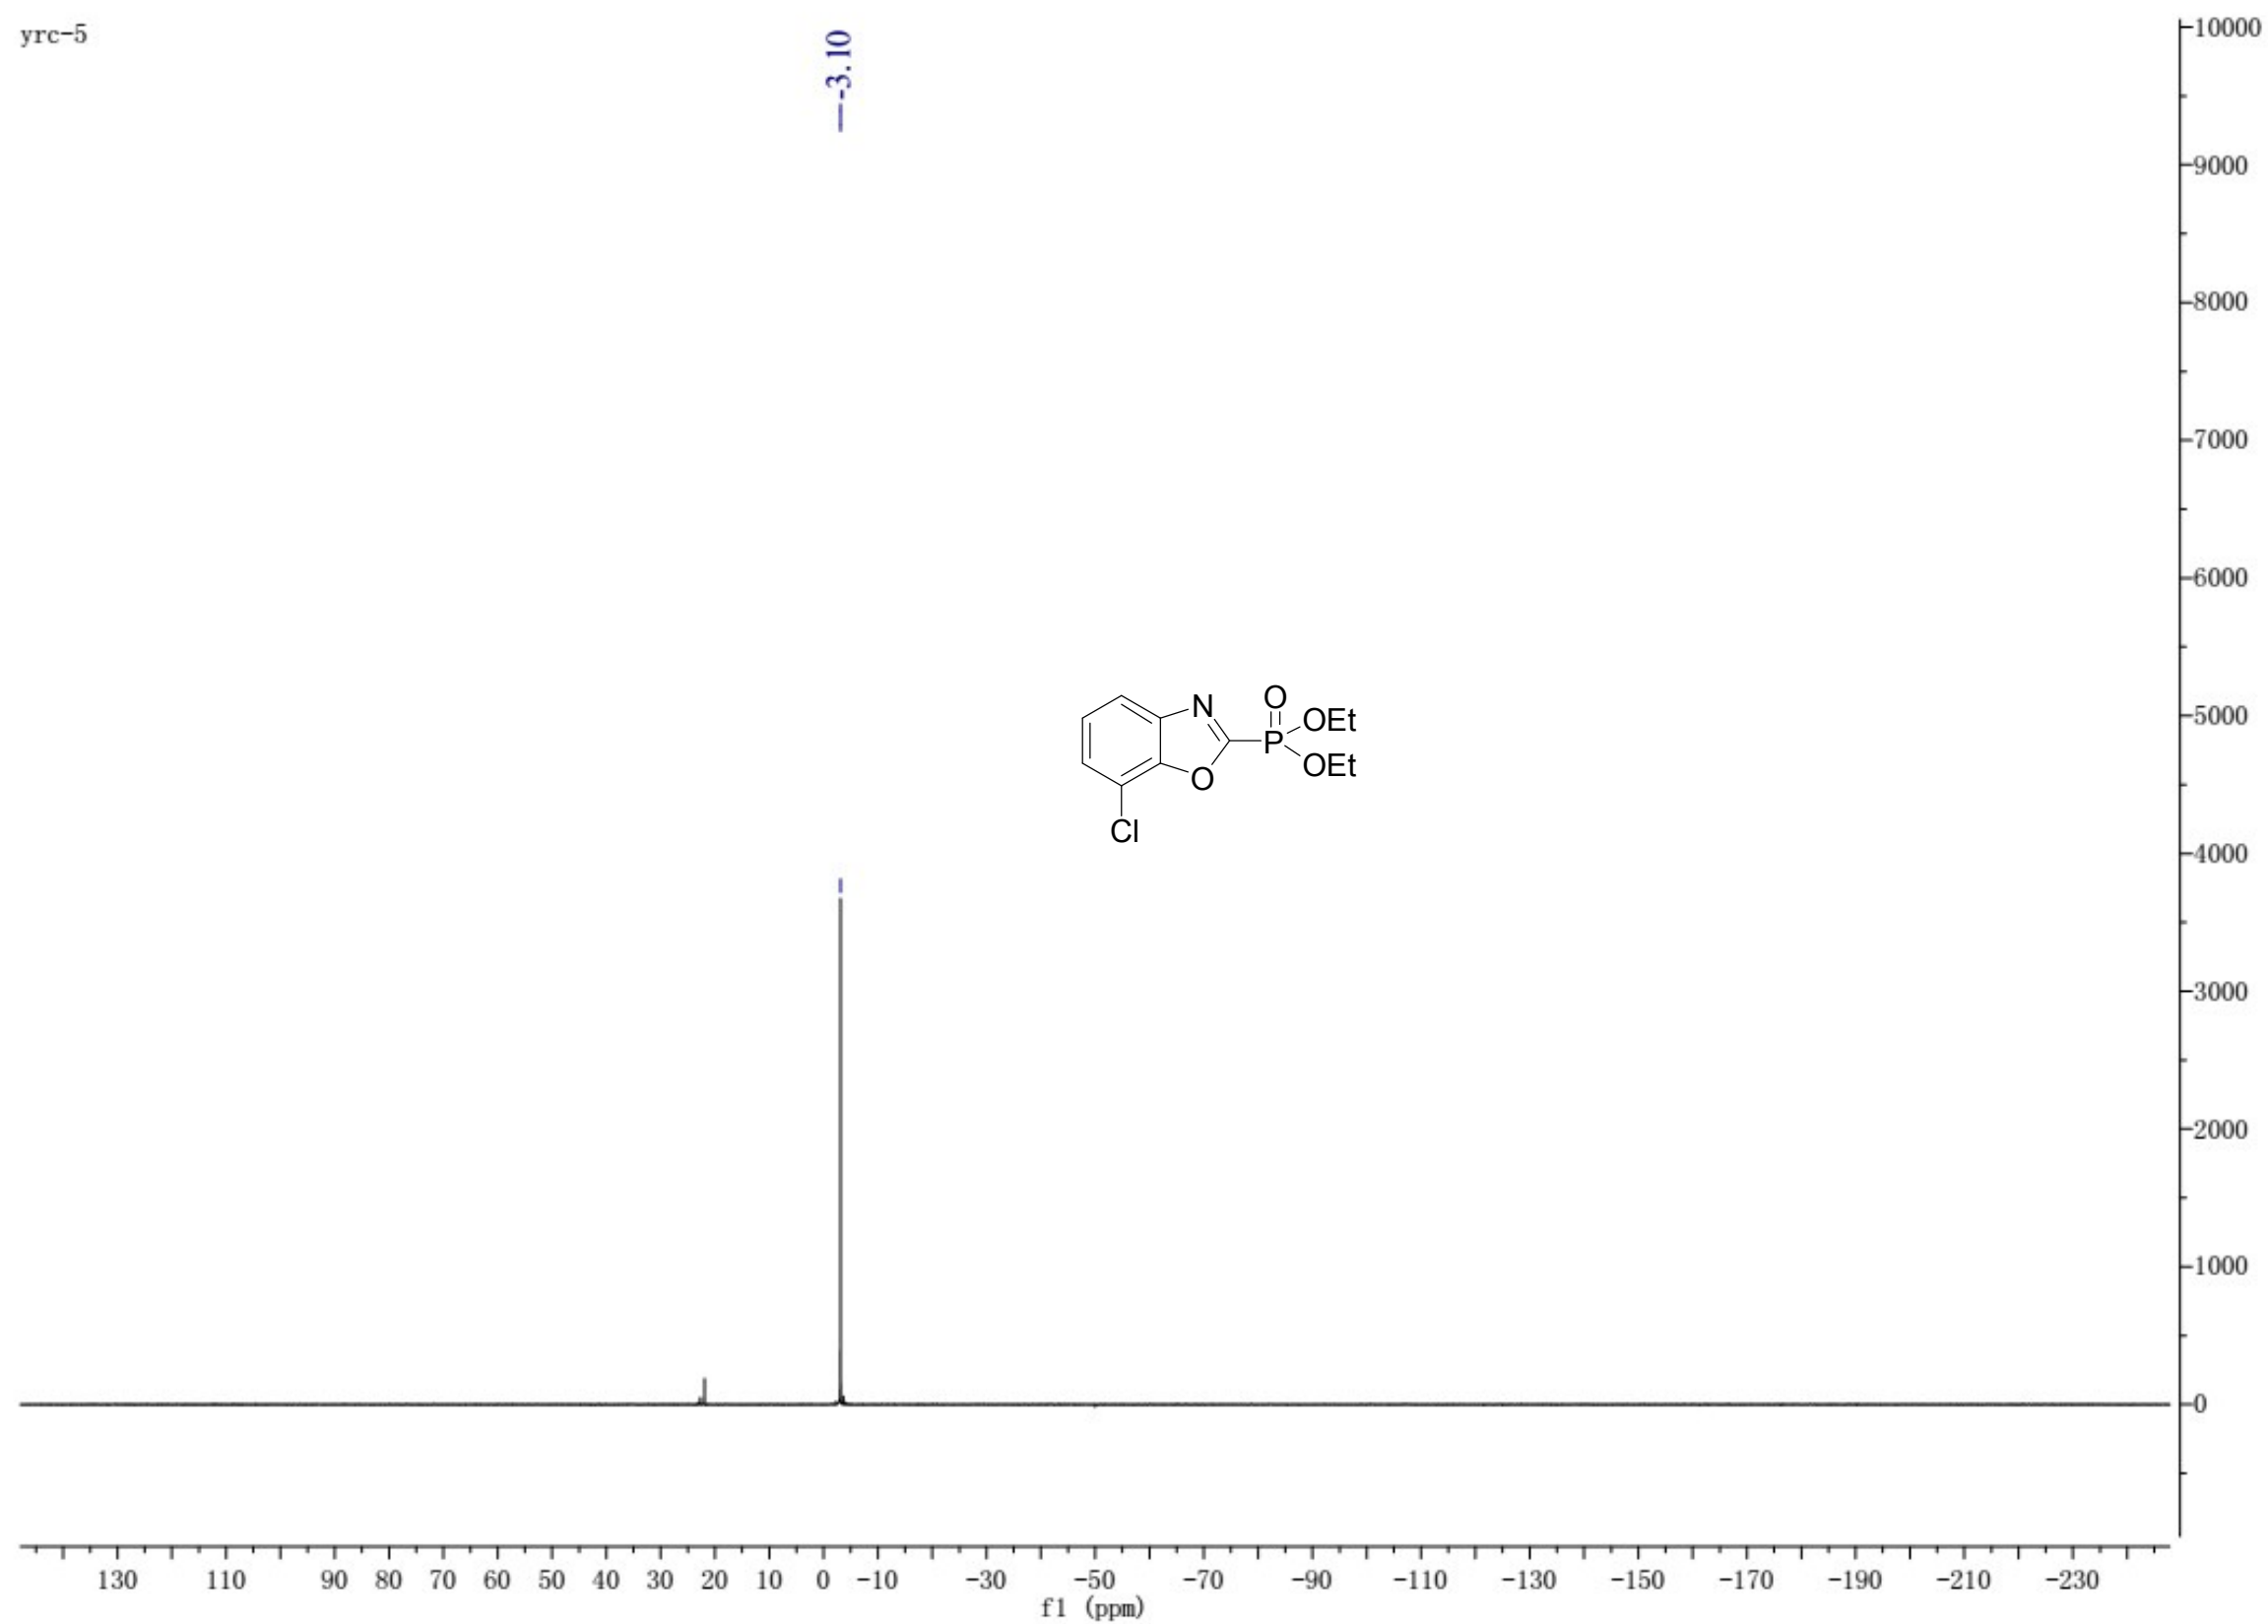

2015-4-17-3

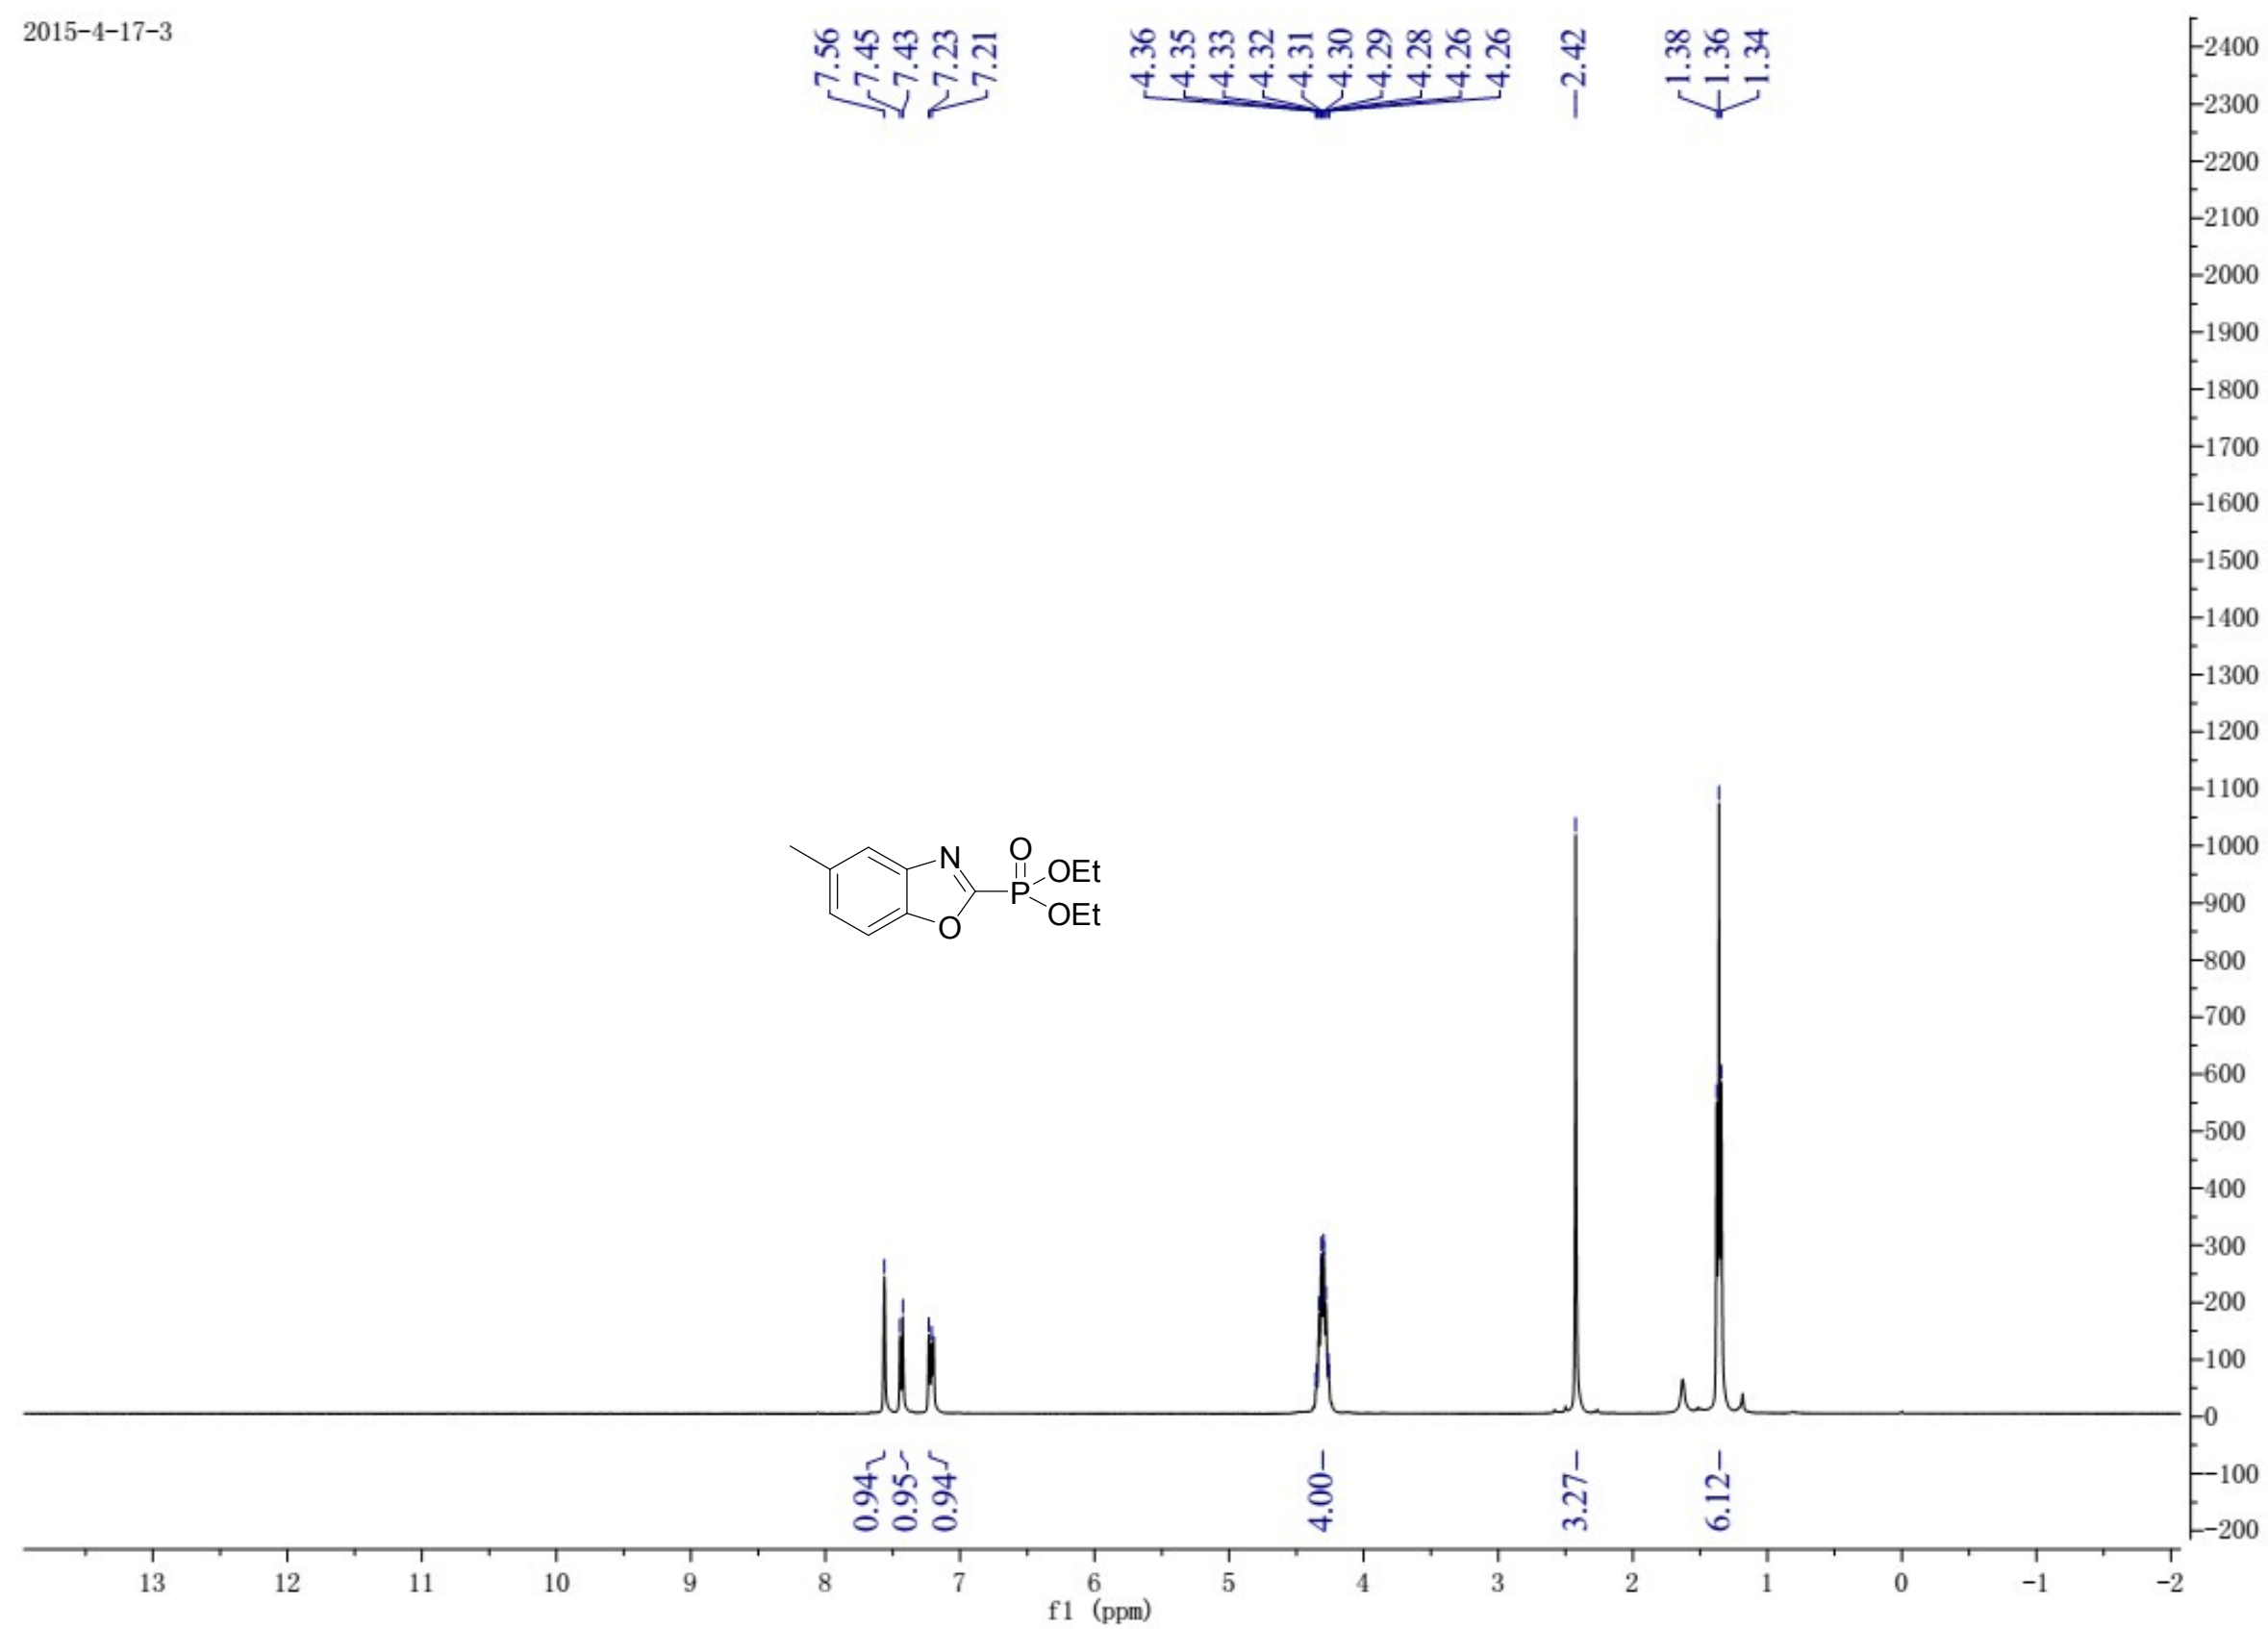

g-14-12-31-2  
STANDARD CARBON PARAMETERS

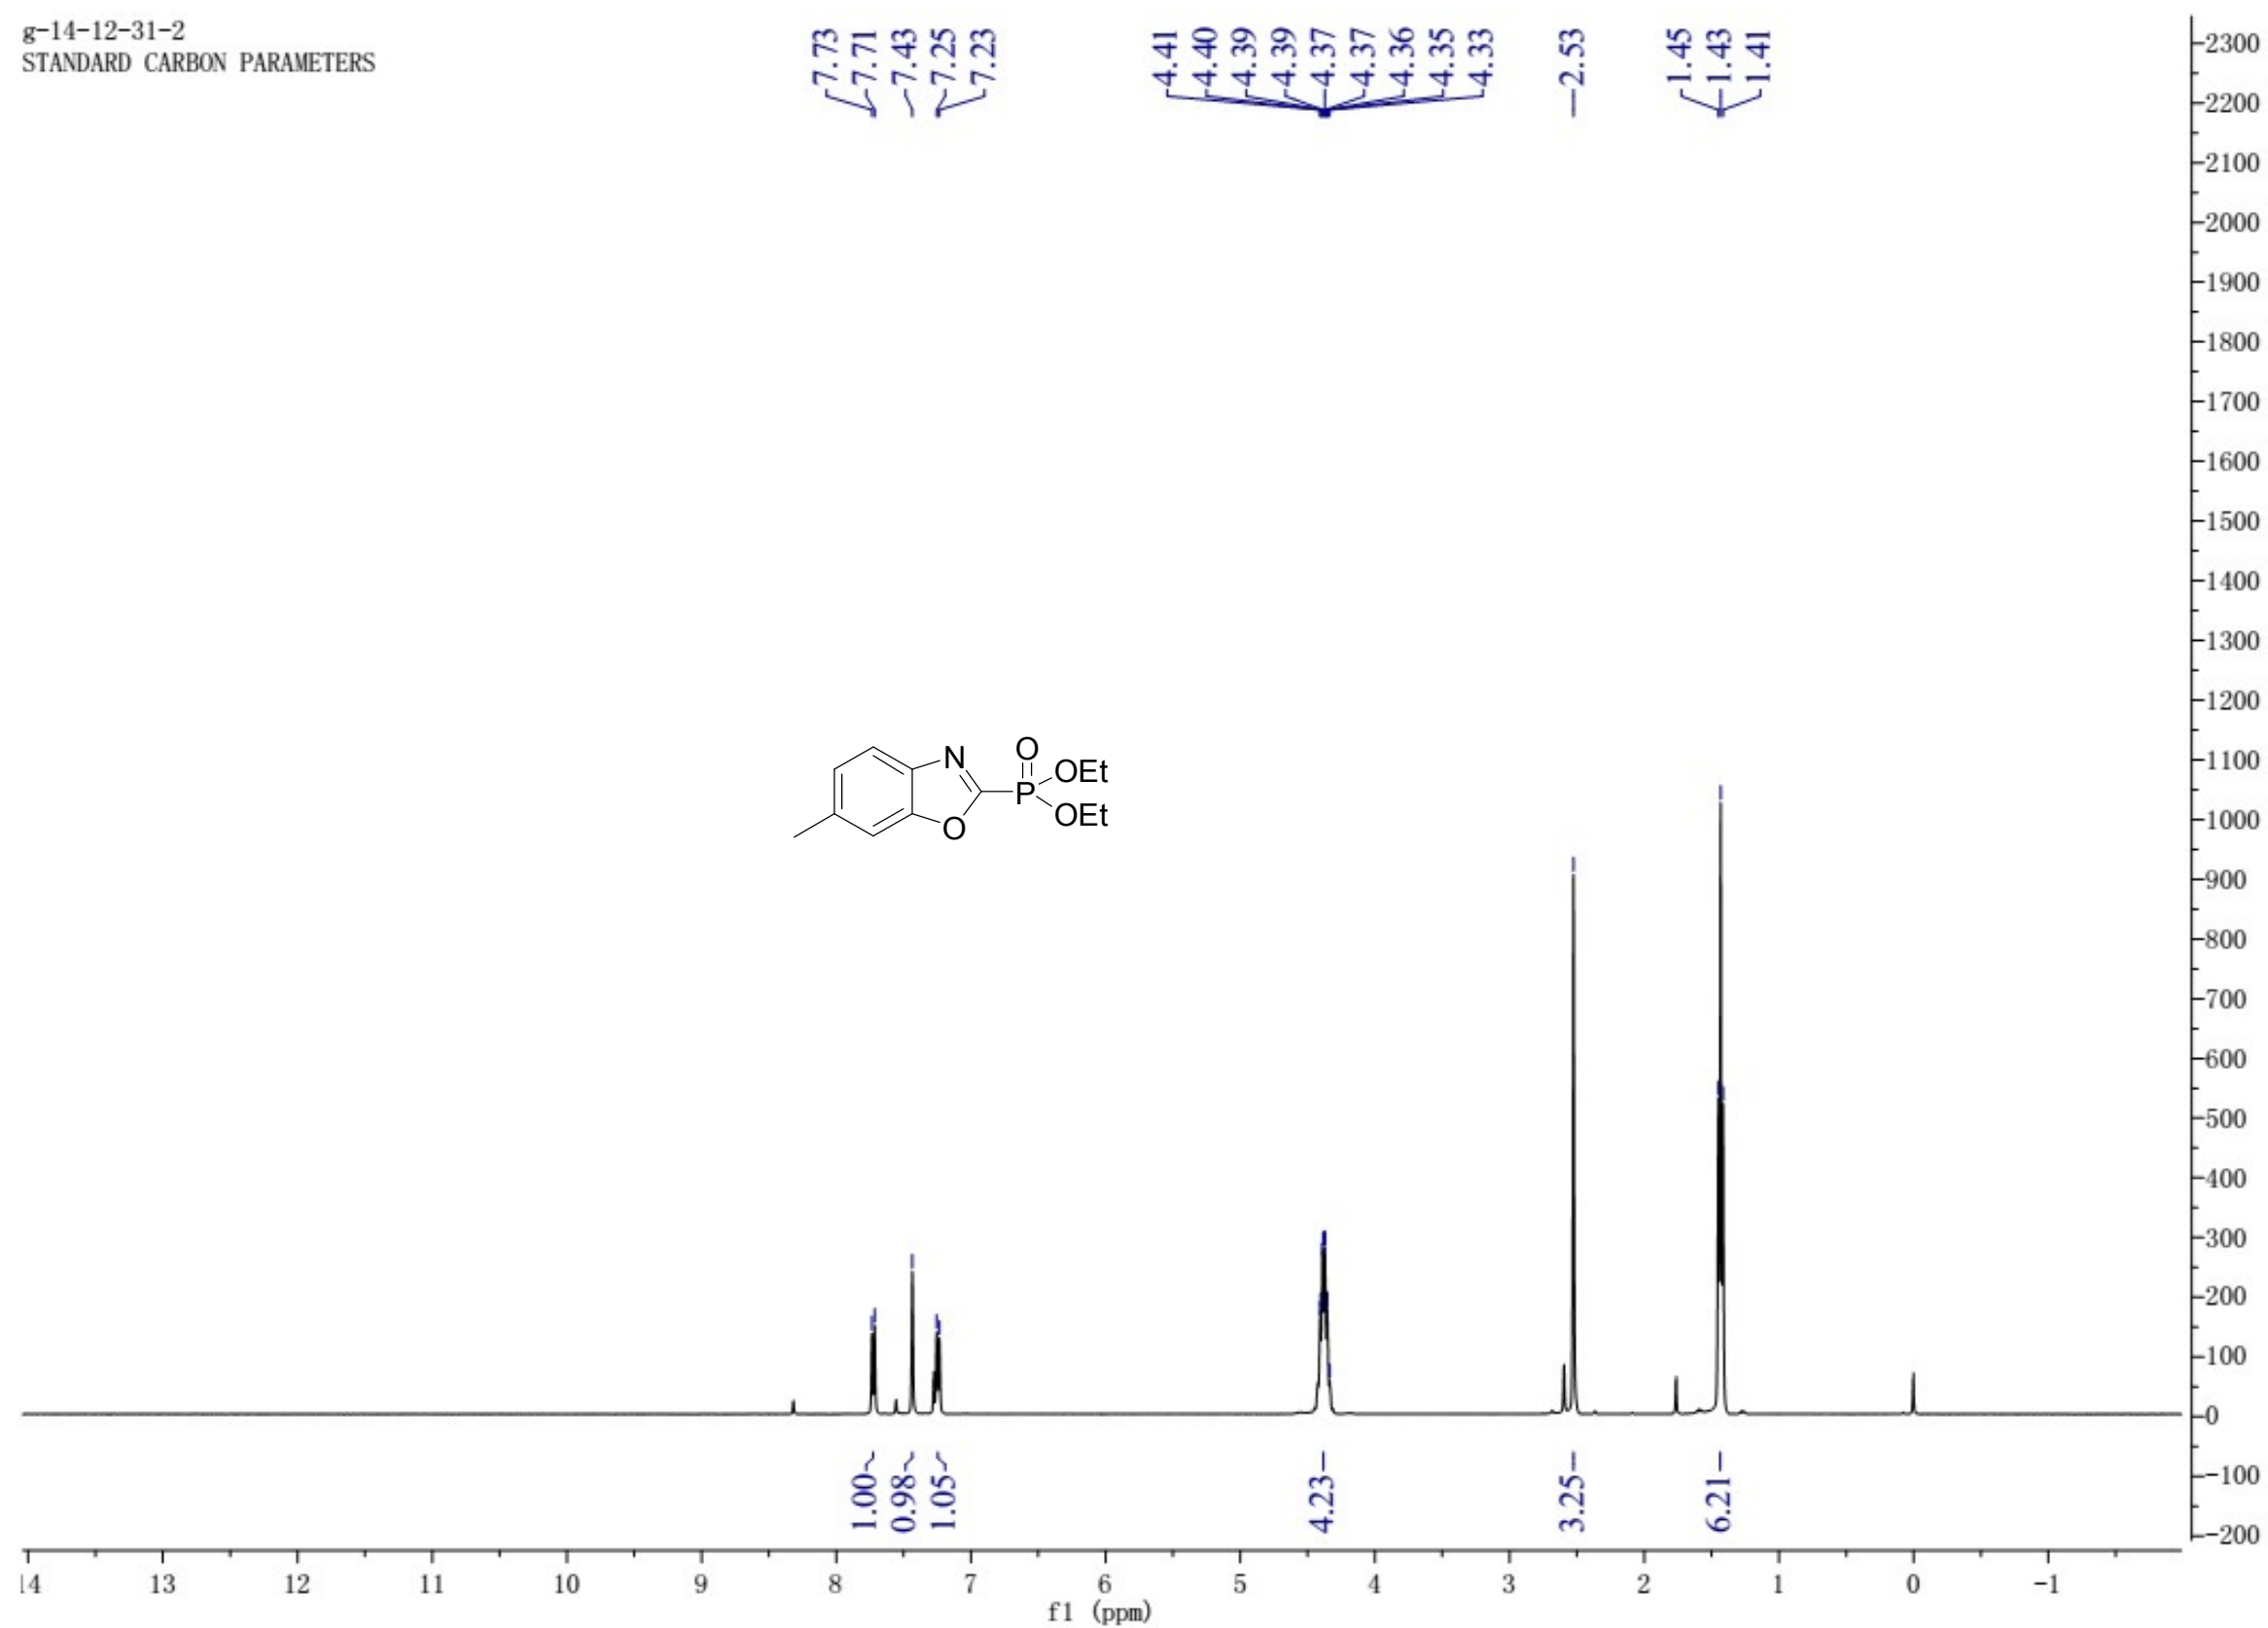

g-15-01-21-1  
Gradient Shimming

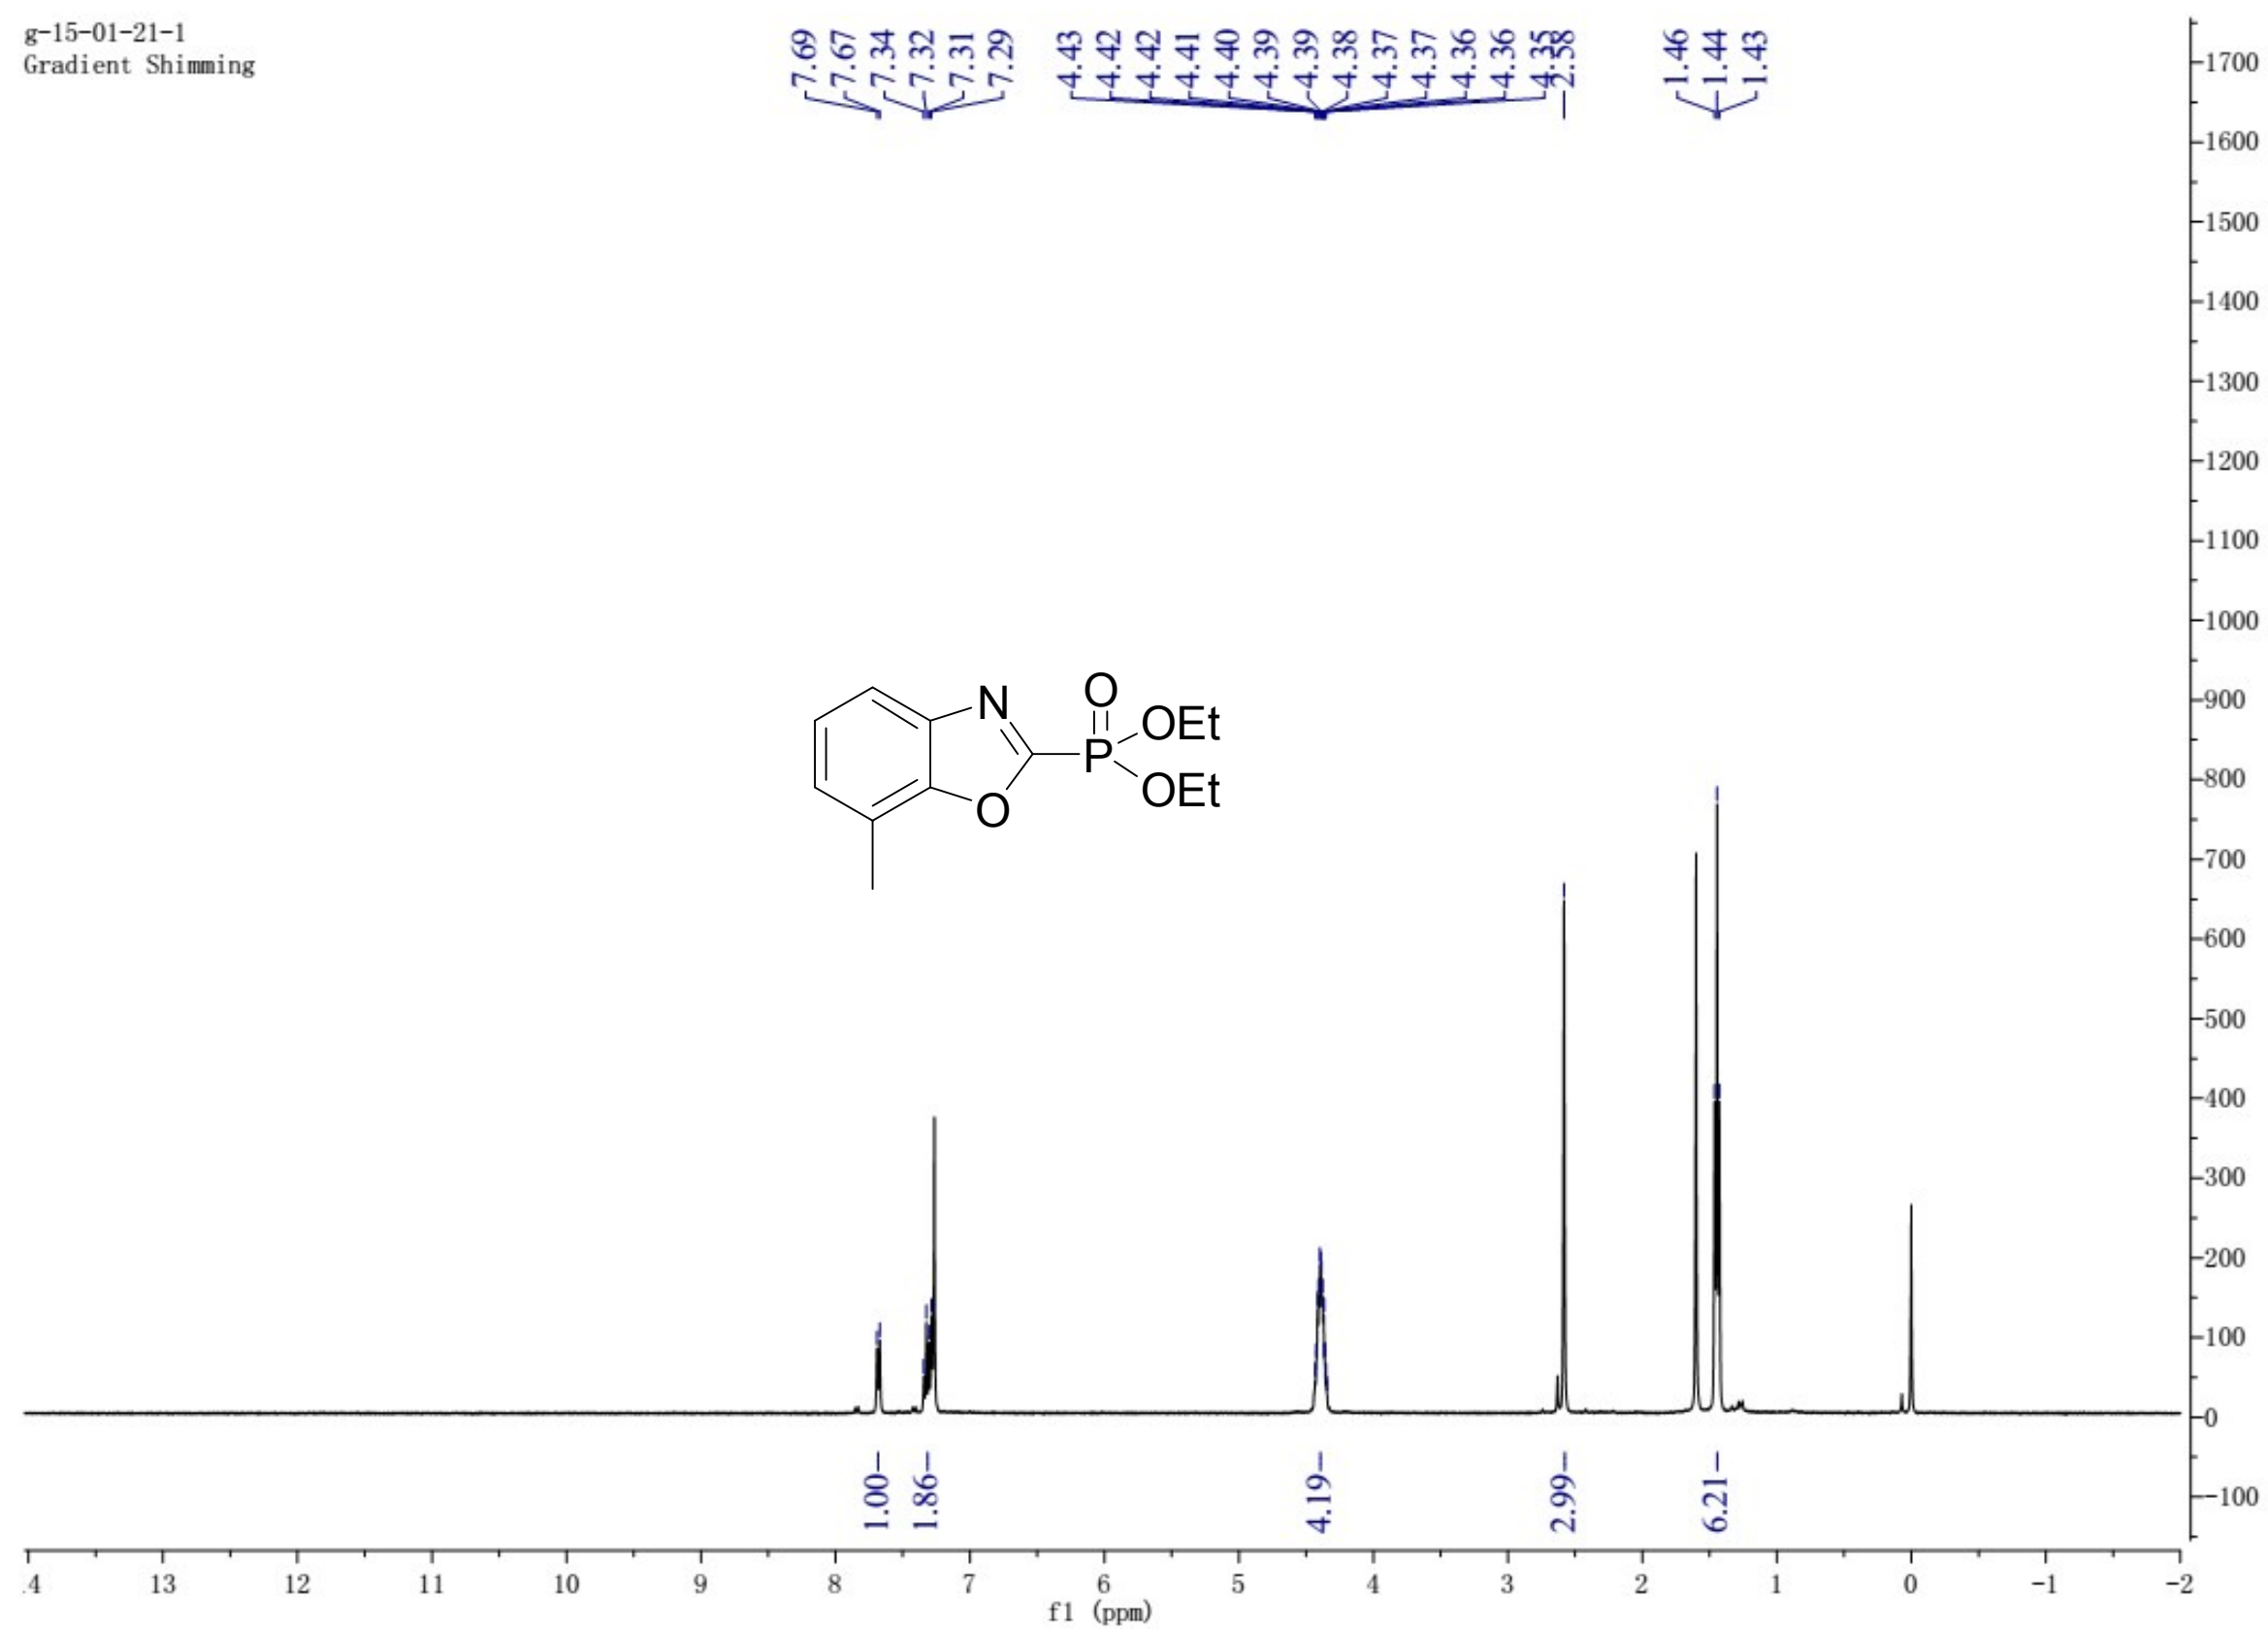

Y150445  
sample7 13C

157.45  
155.68  
150.66  
150.63  
140.03  
139.93  
128.32  
125.44  
122.42  
118.98

64.73  
64.69

16.44  
16.40  
15.42

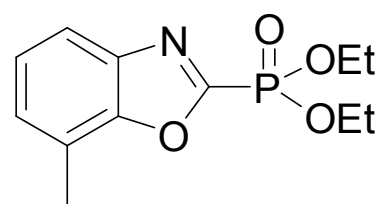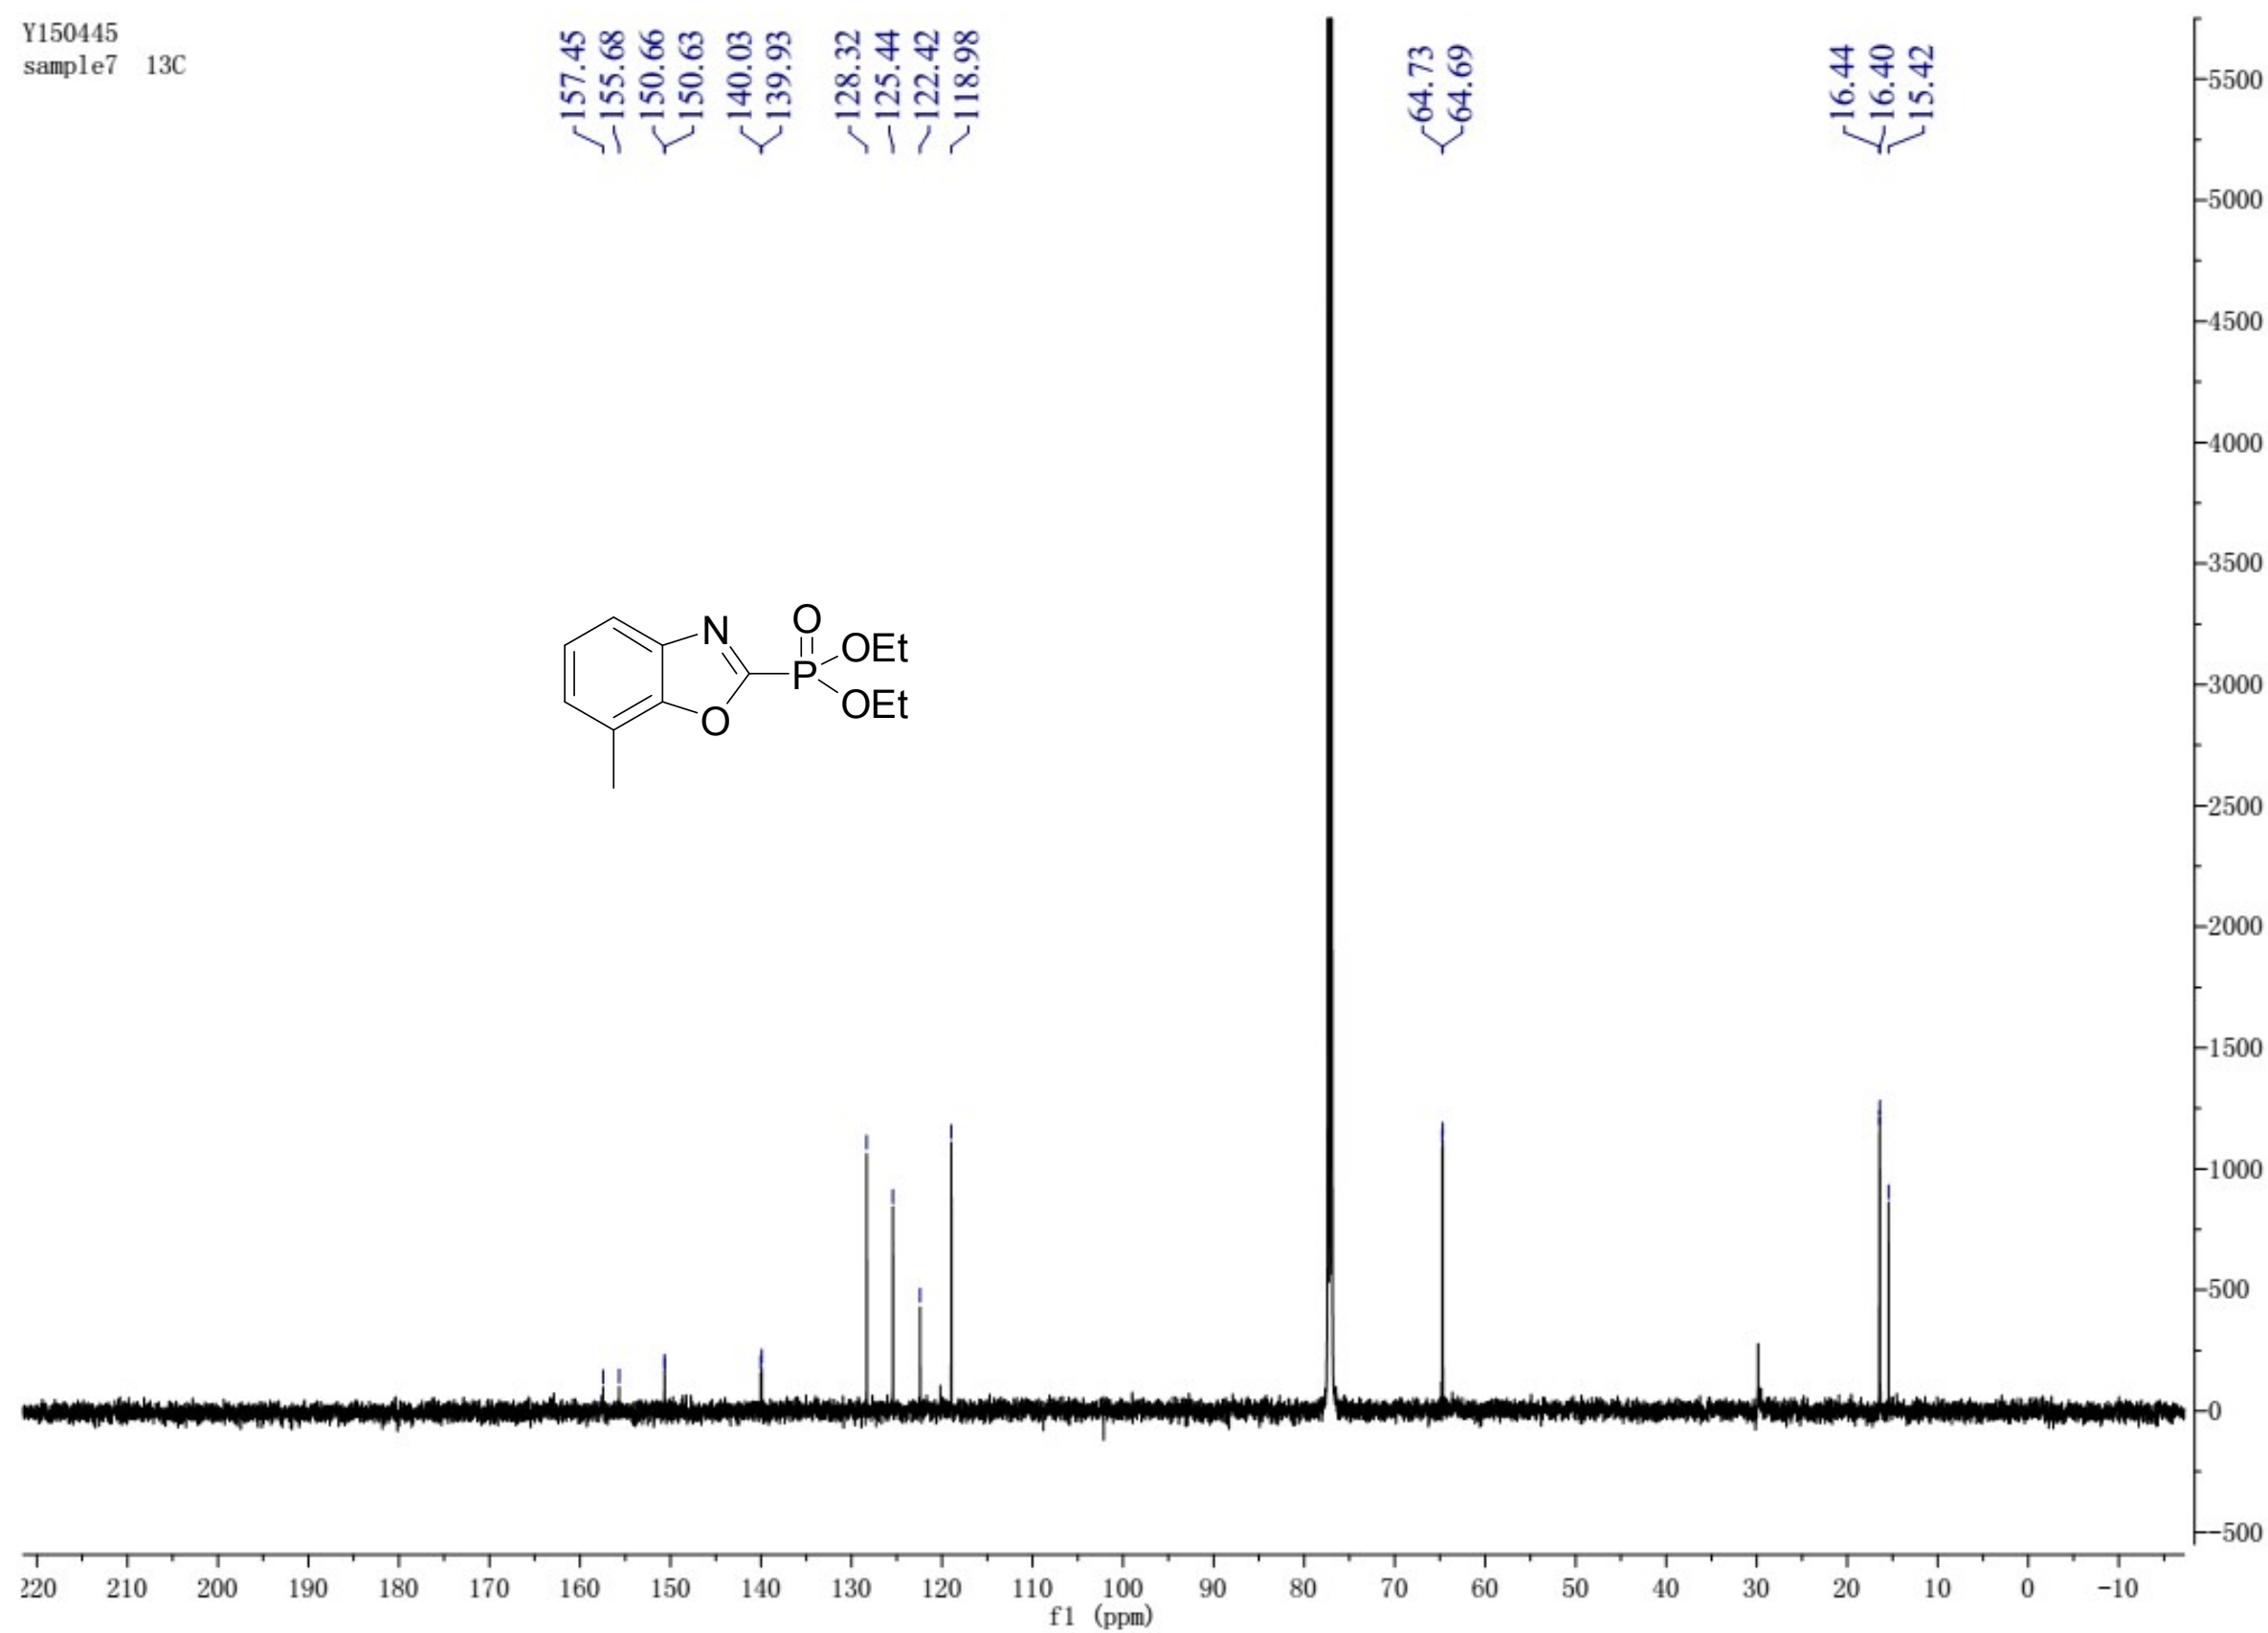

Y150445  
sample7 31P

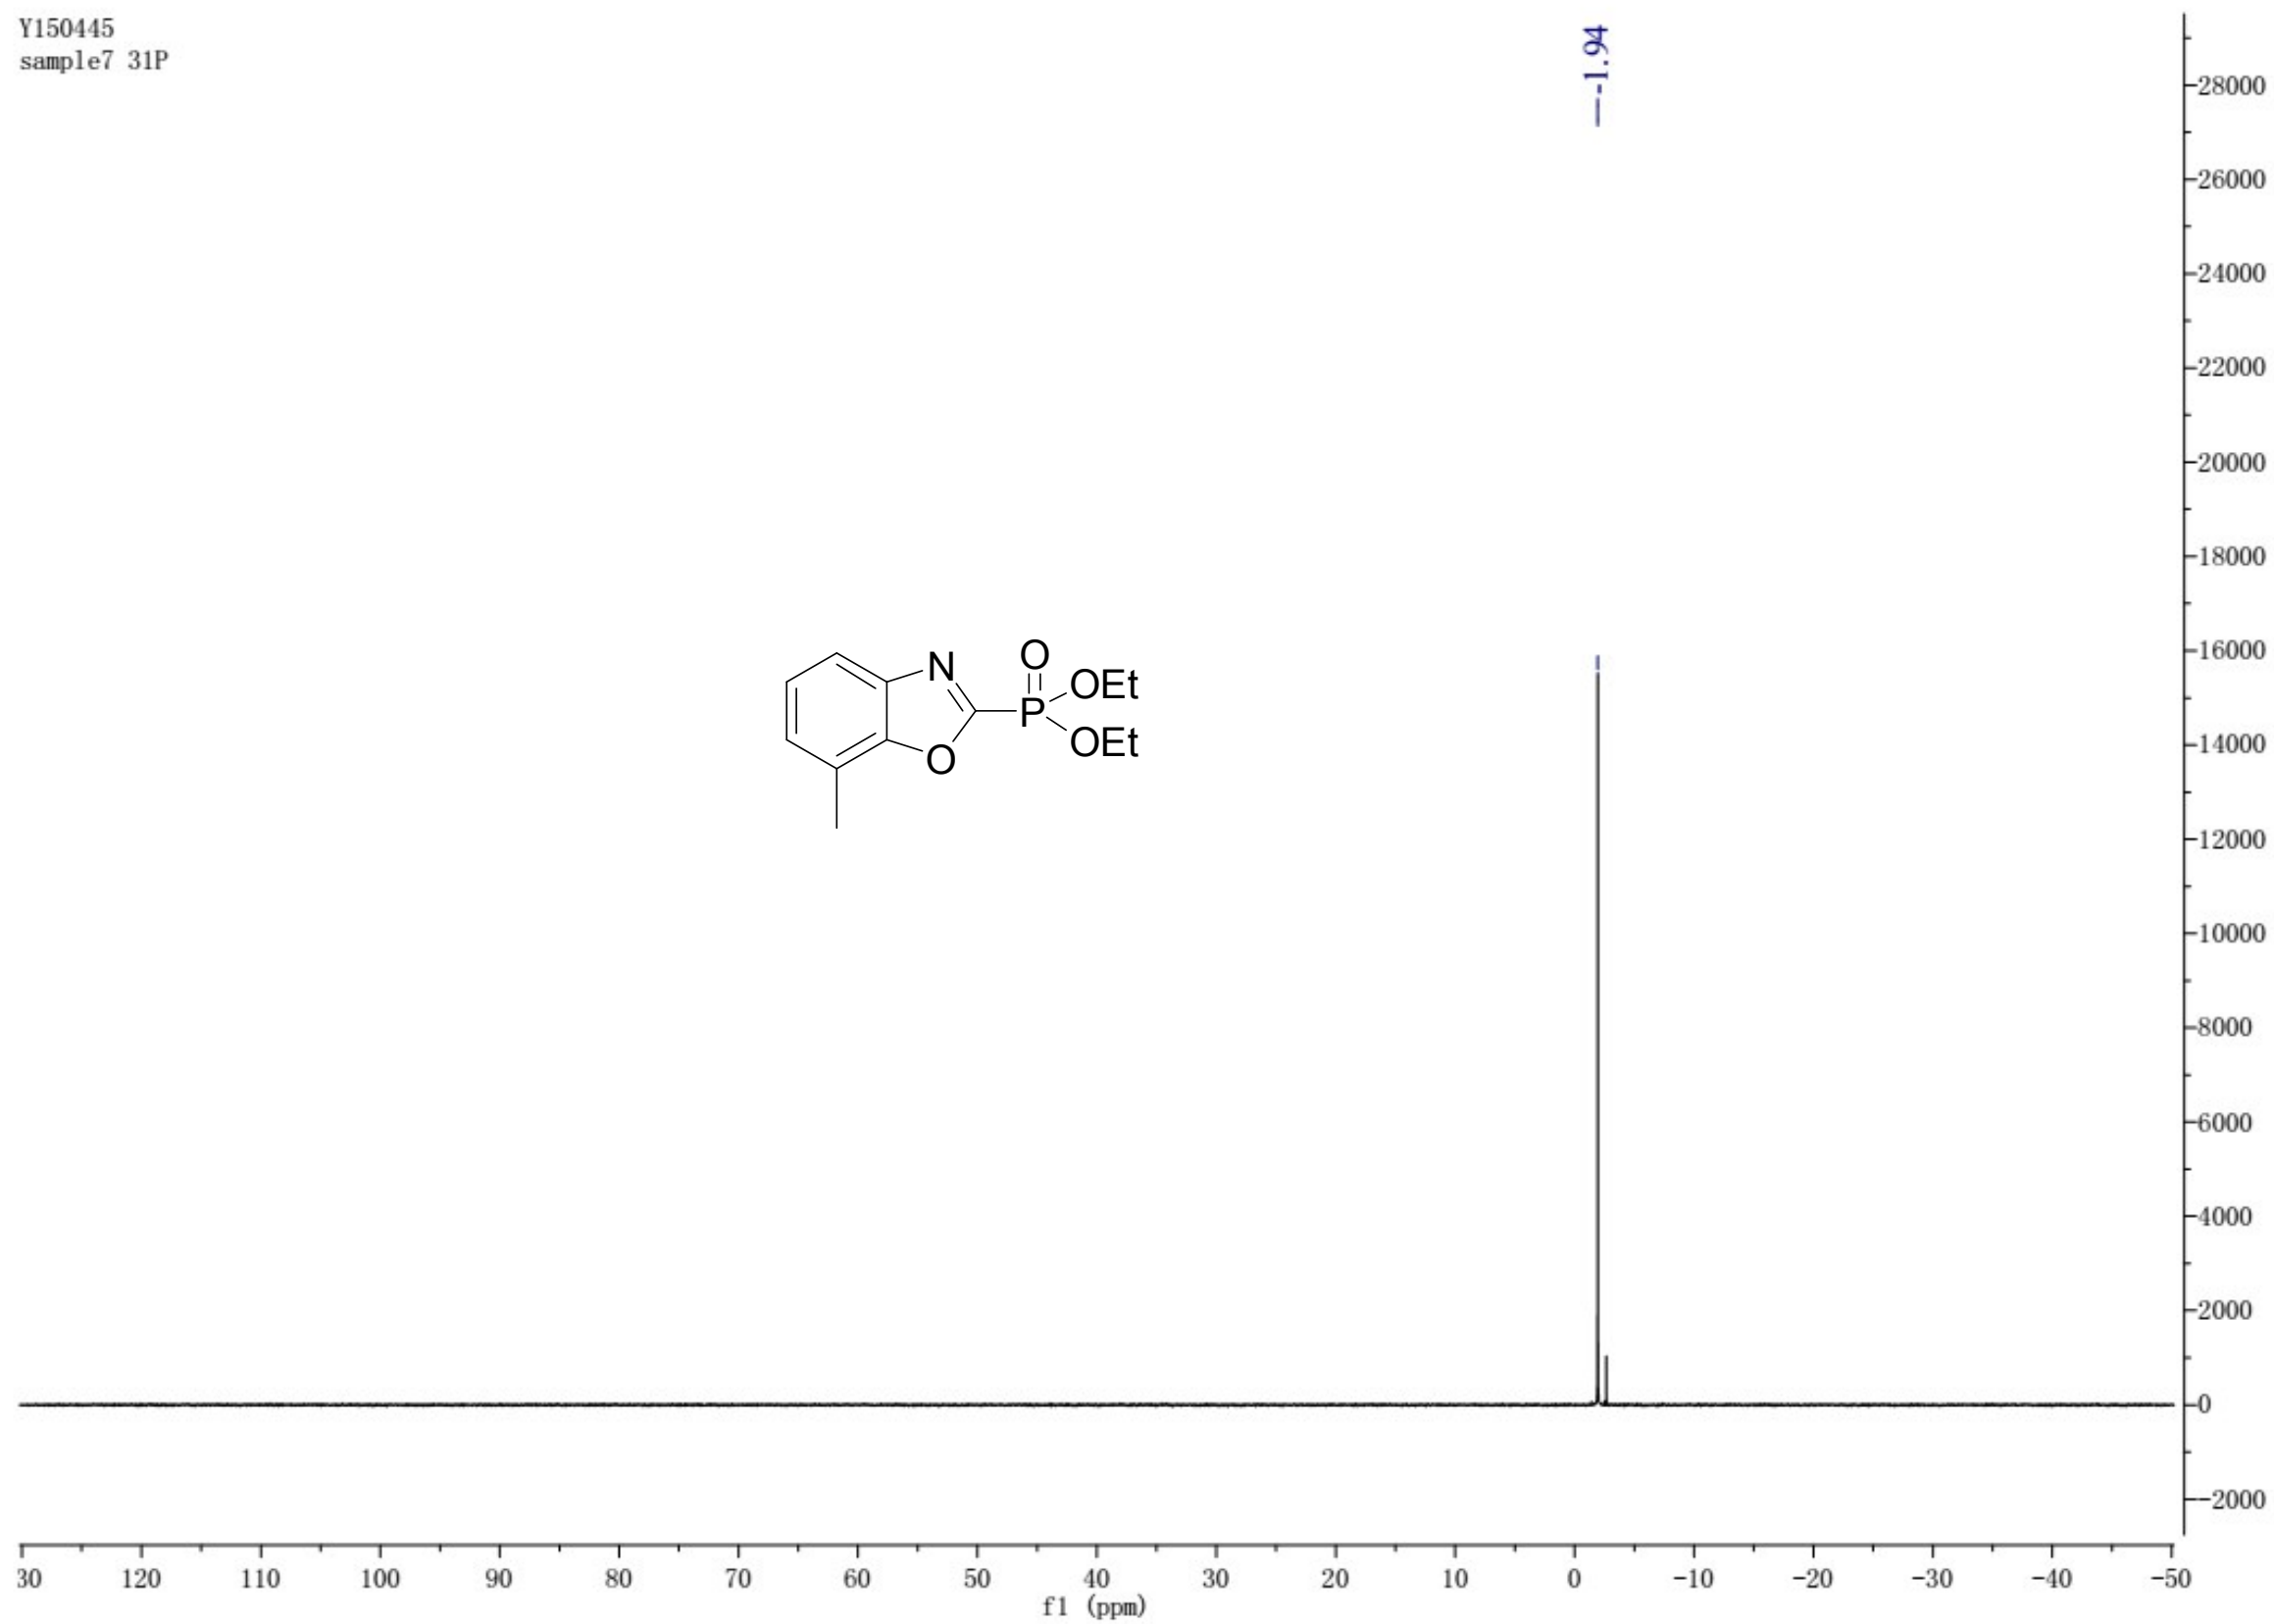

20141211-2H  
Gradient Shimming

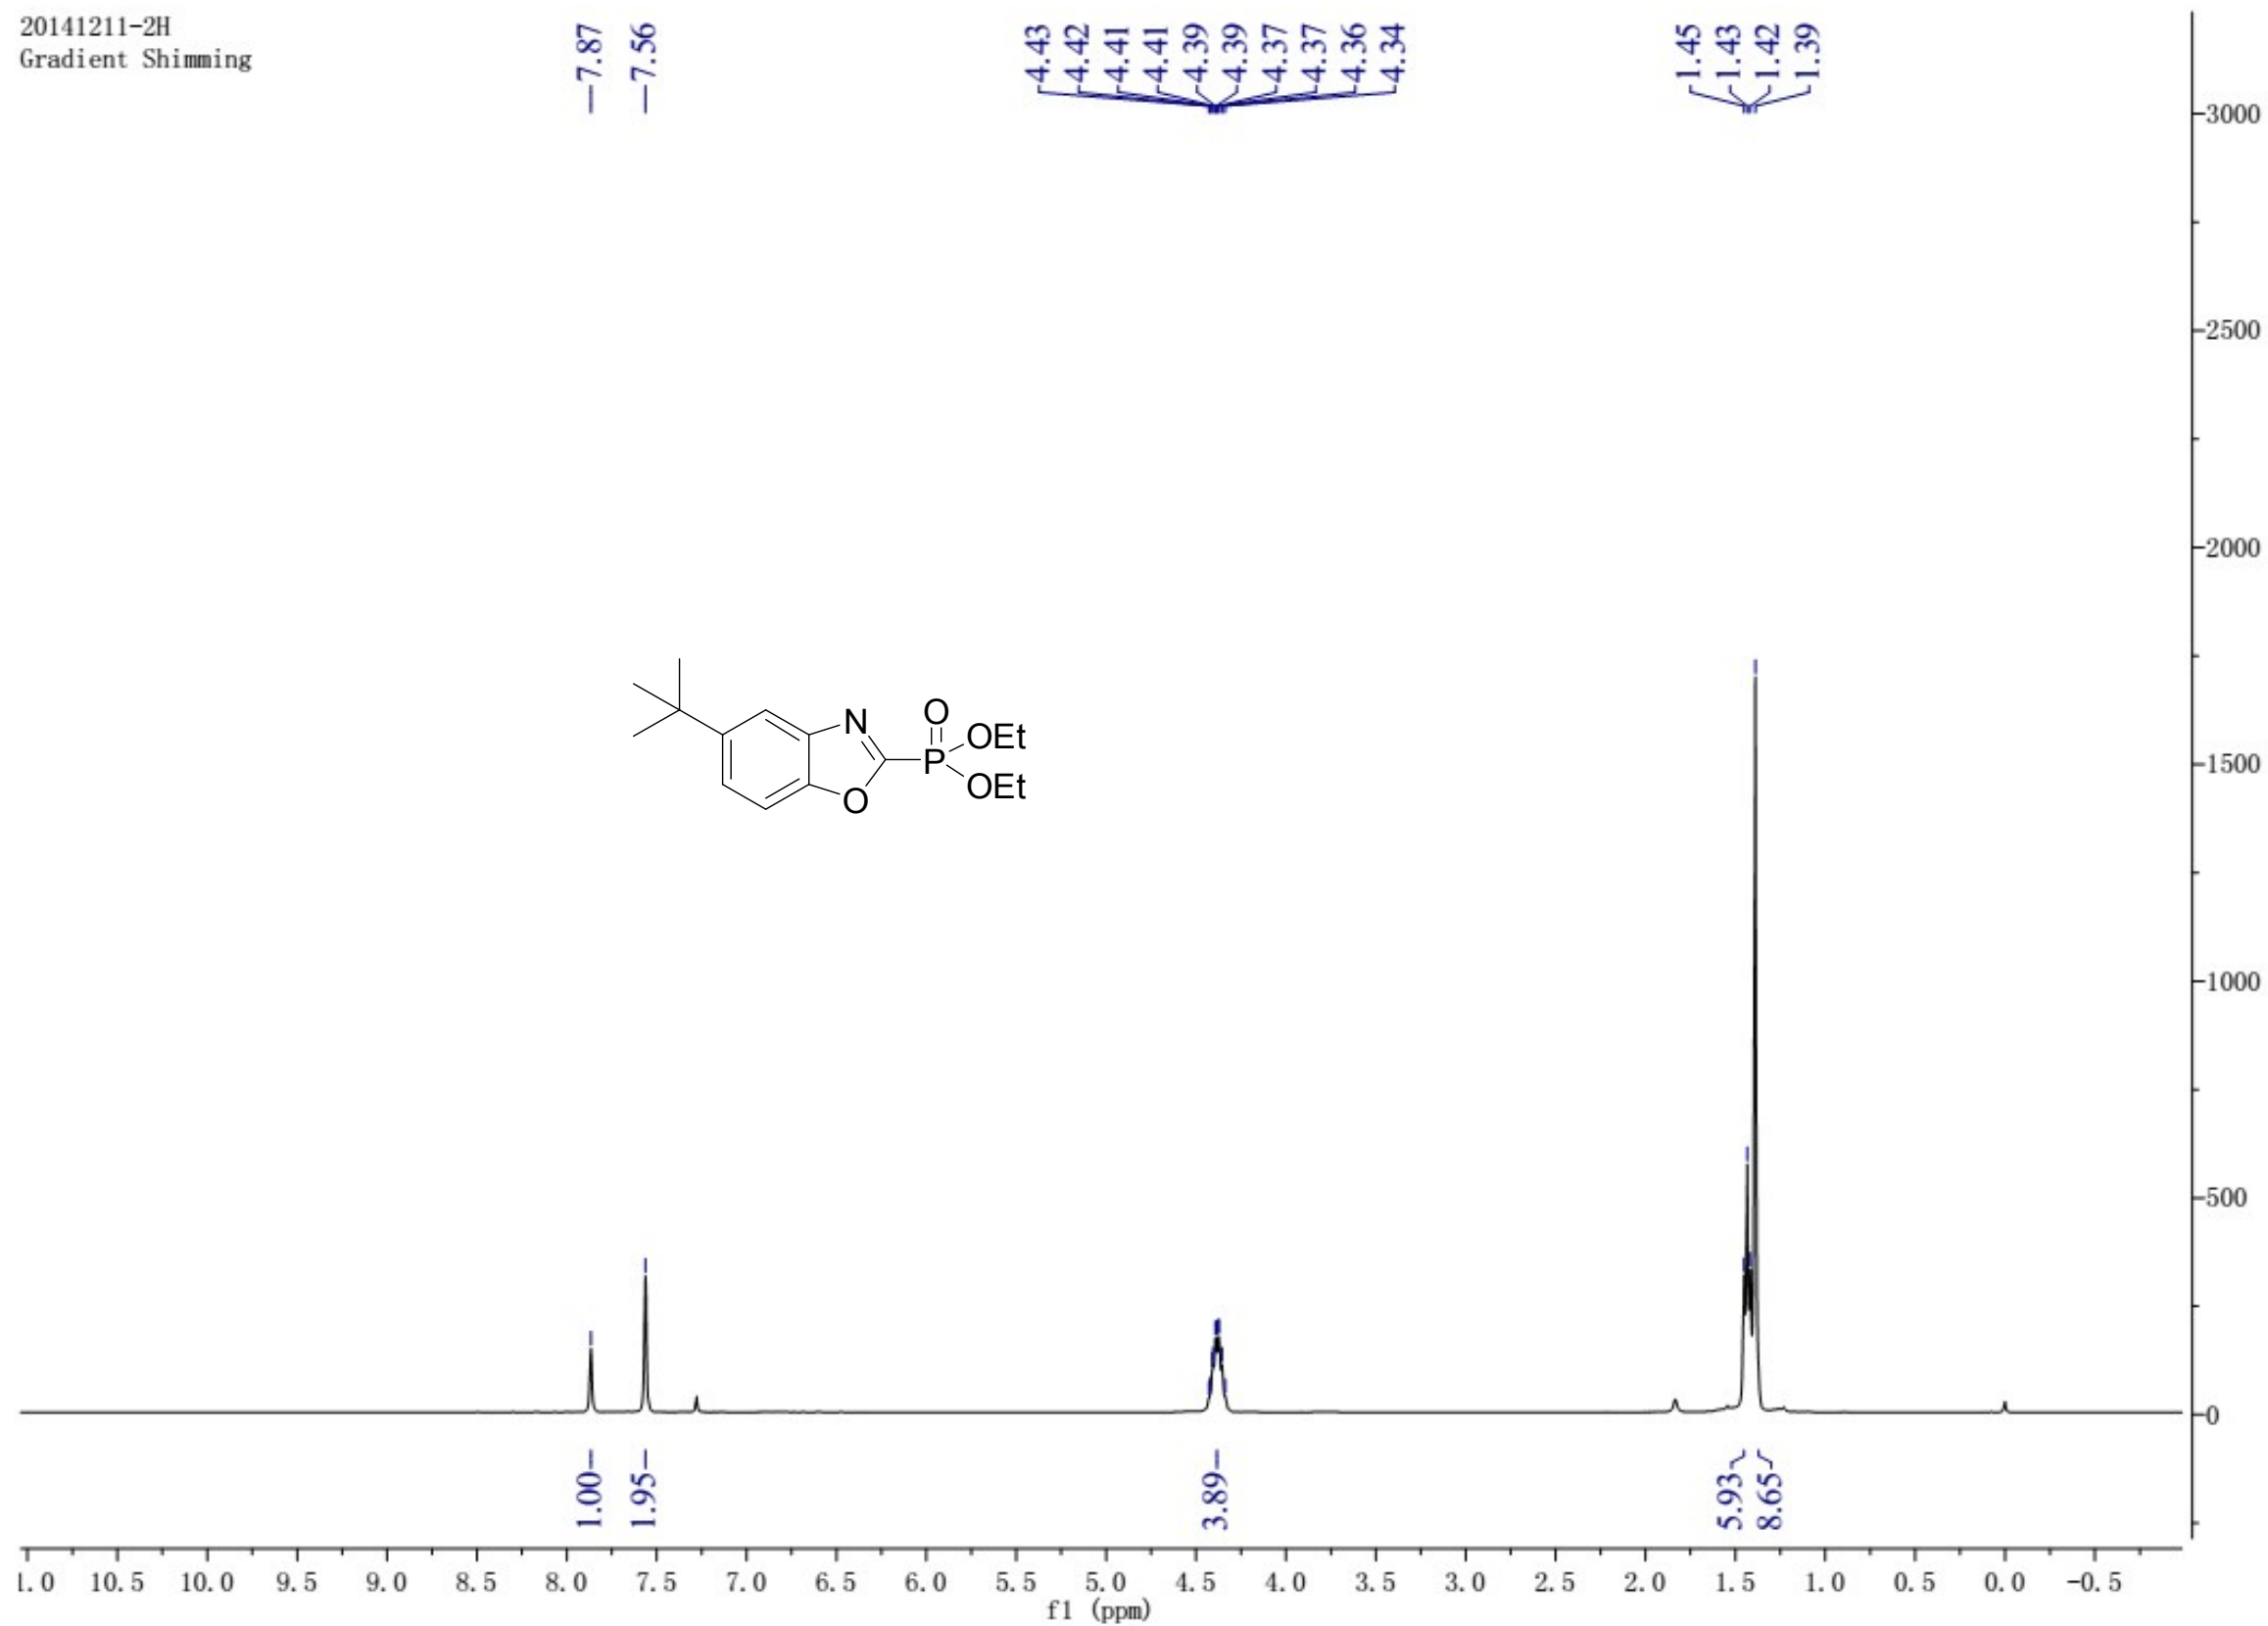

2014-12-12-1  
Gradient Shimming

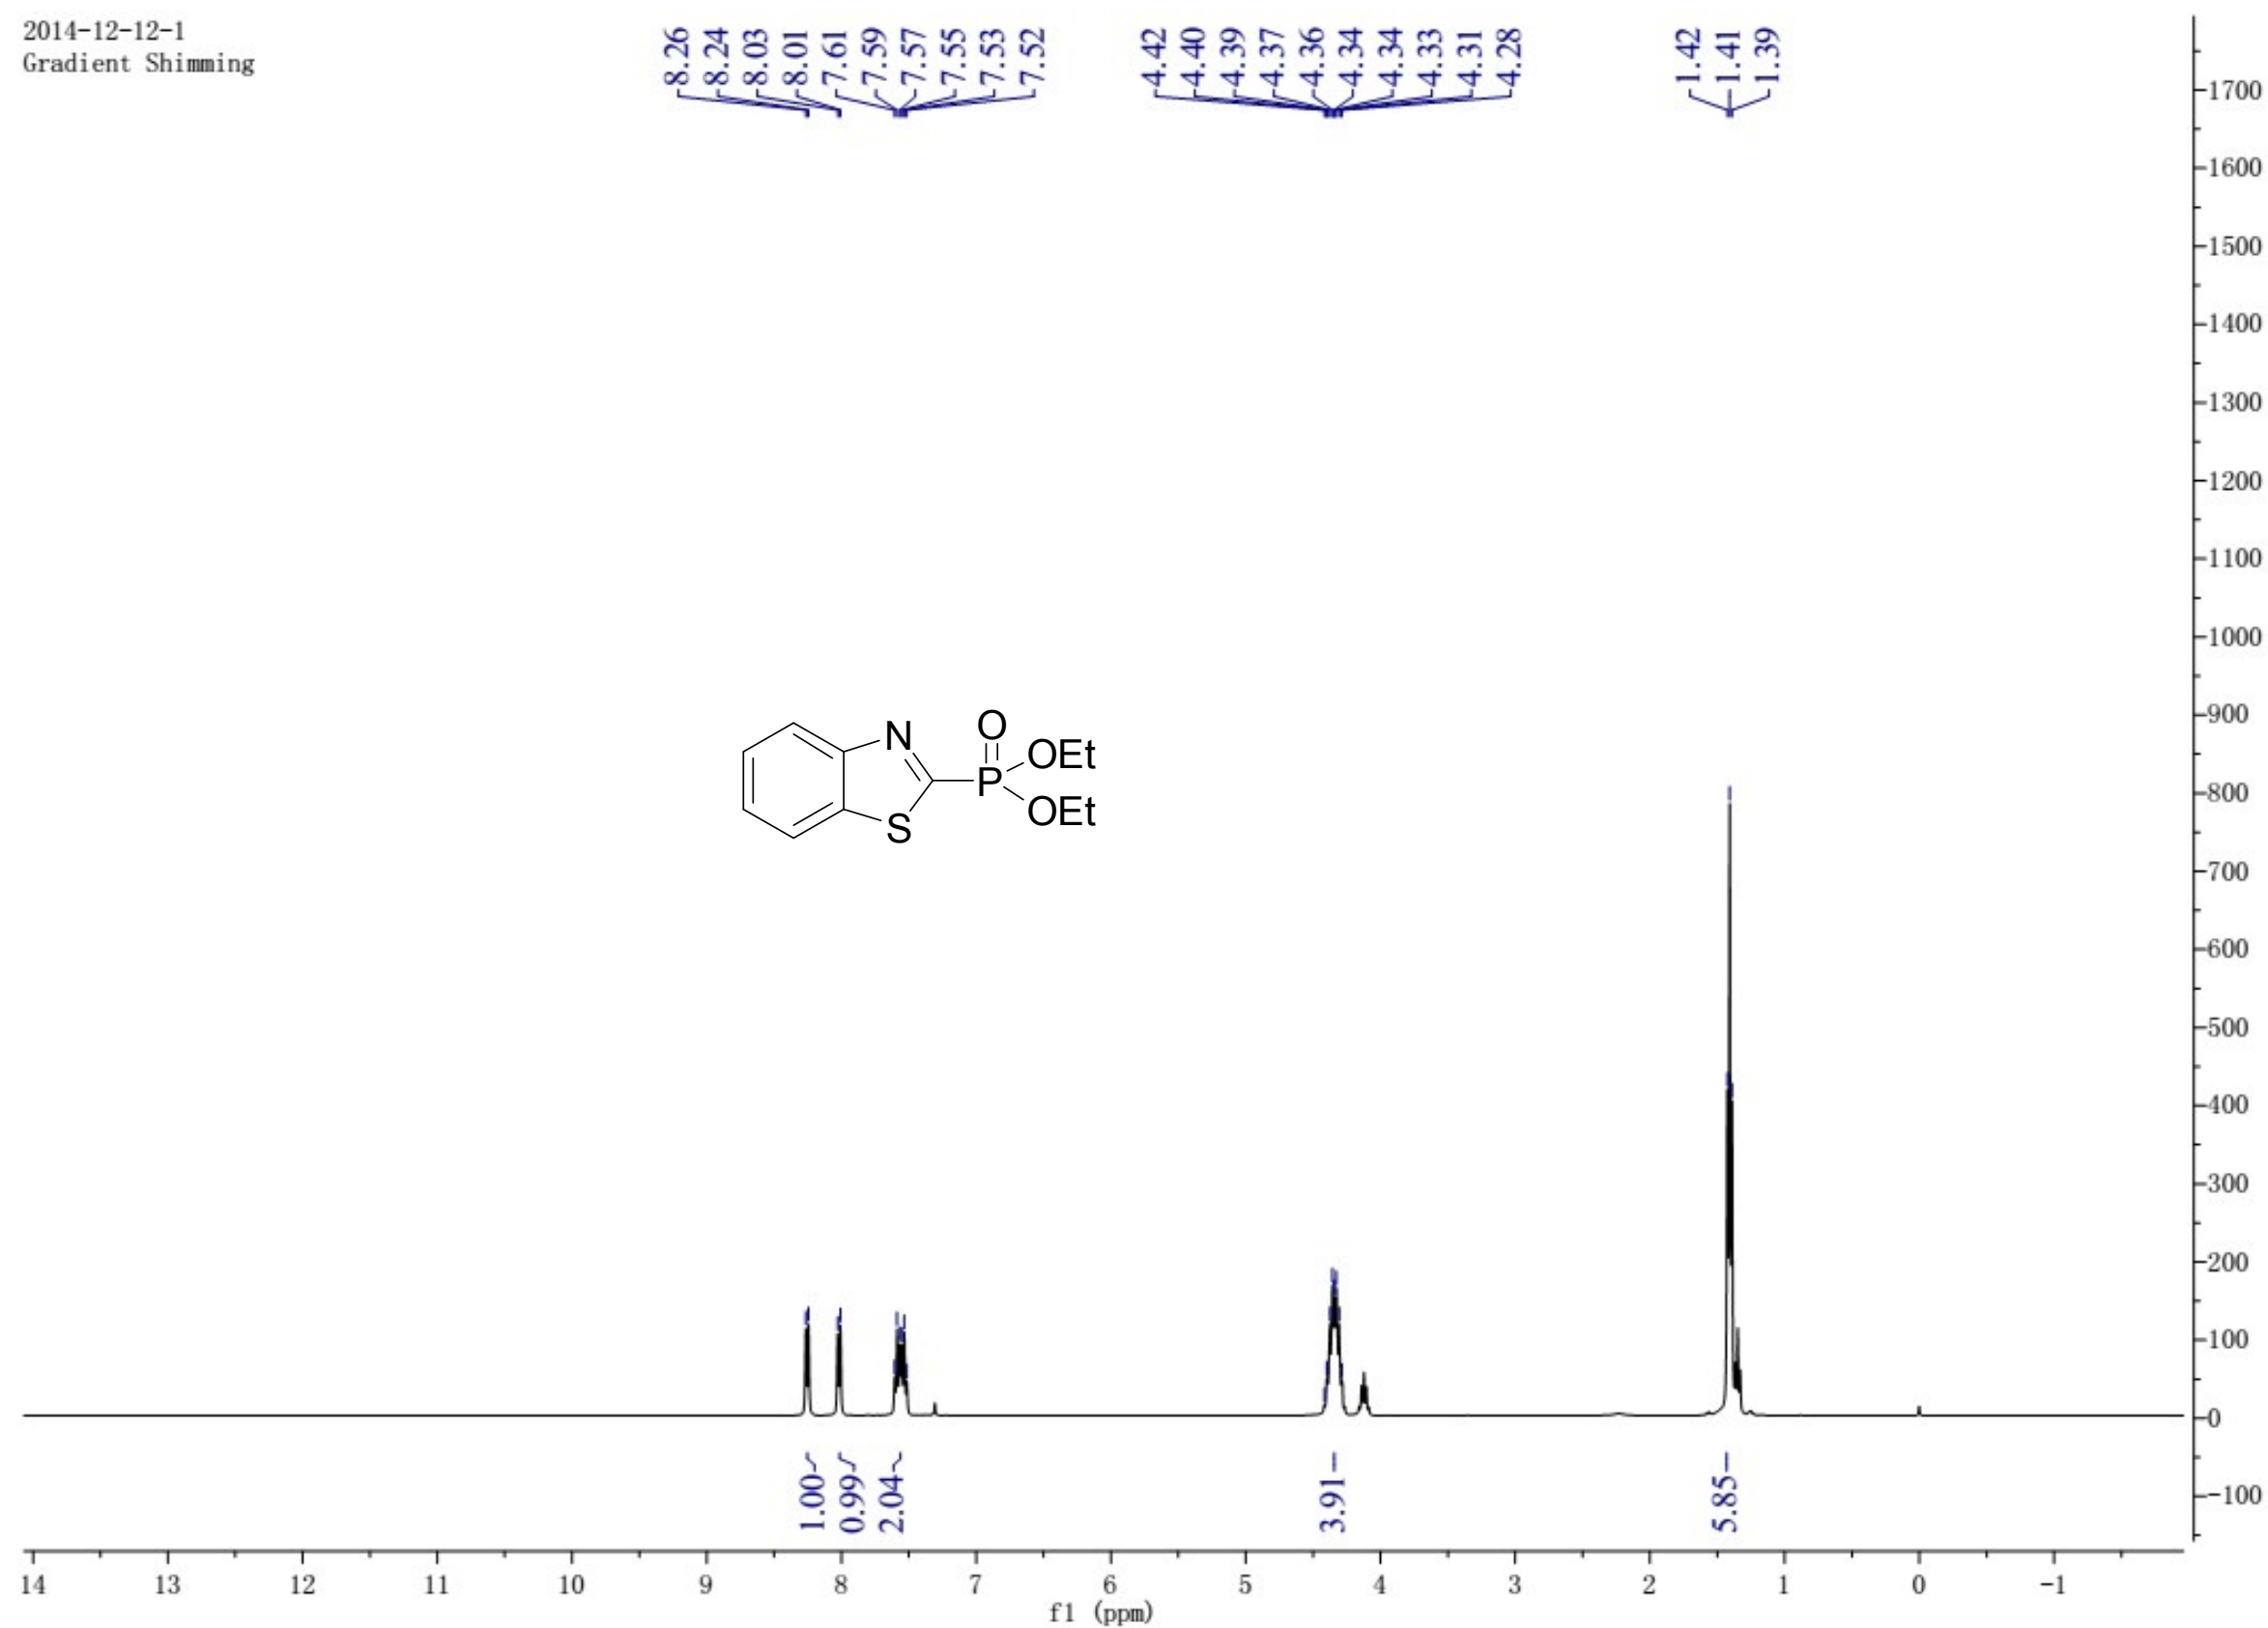

20150402-4  
Gradient Shimming

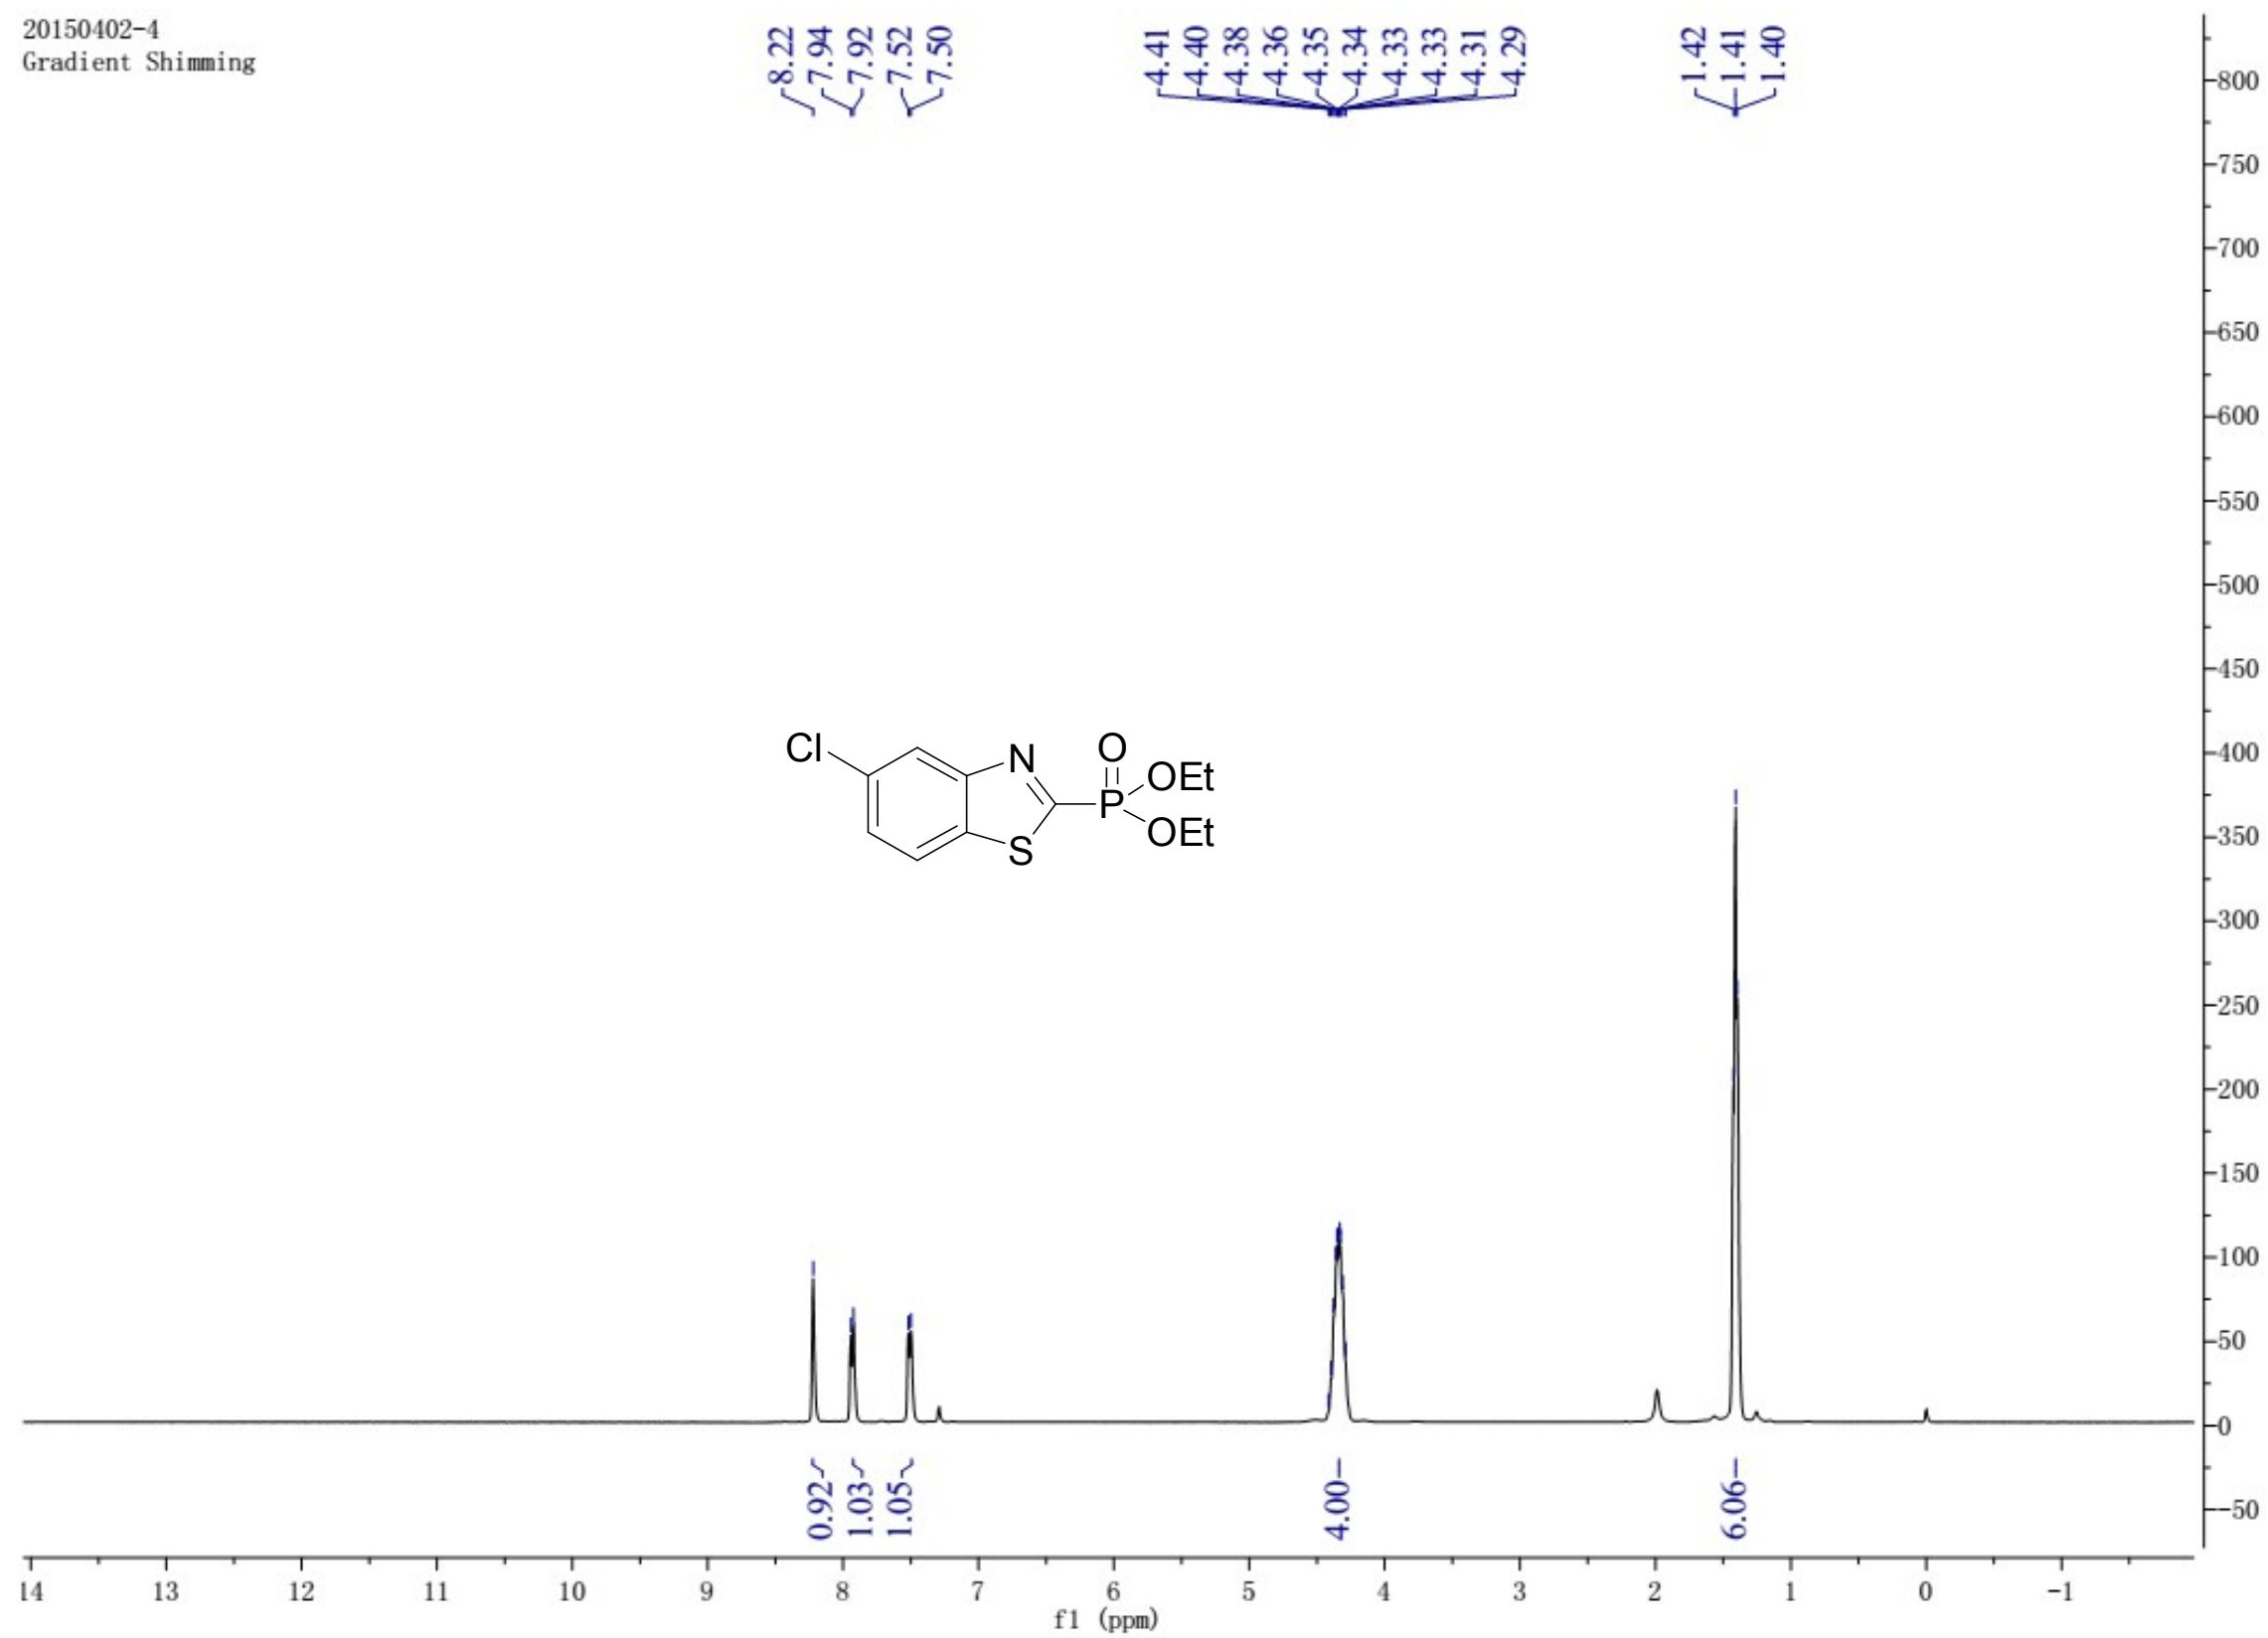

Y150445  
sample1 13C

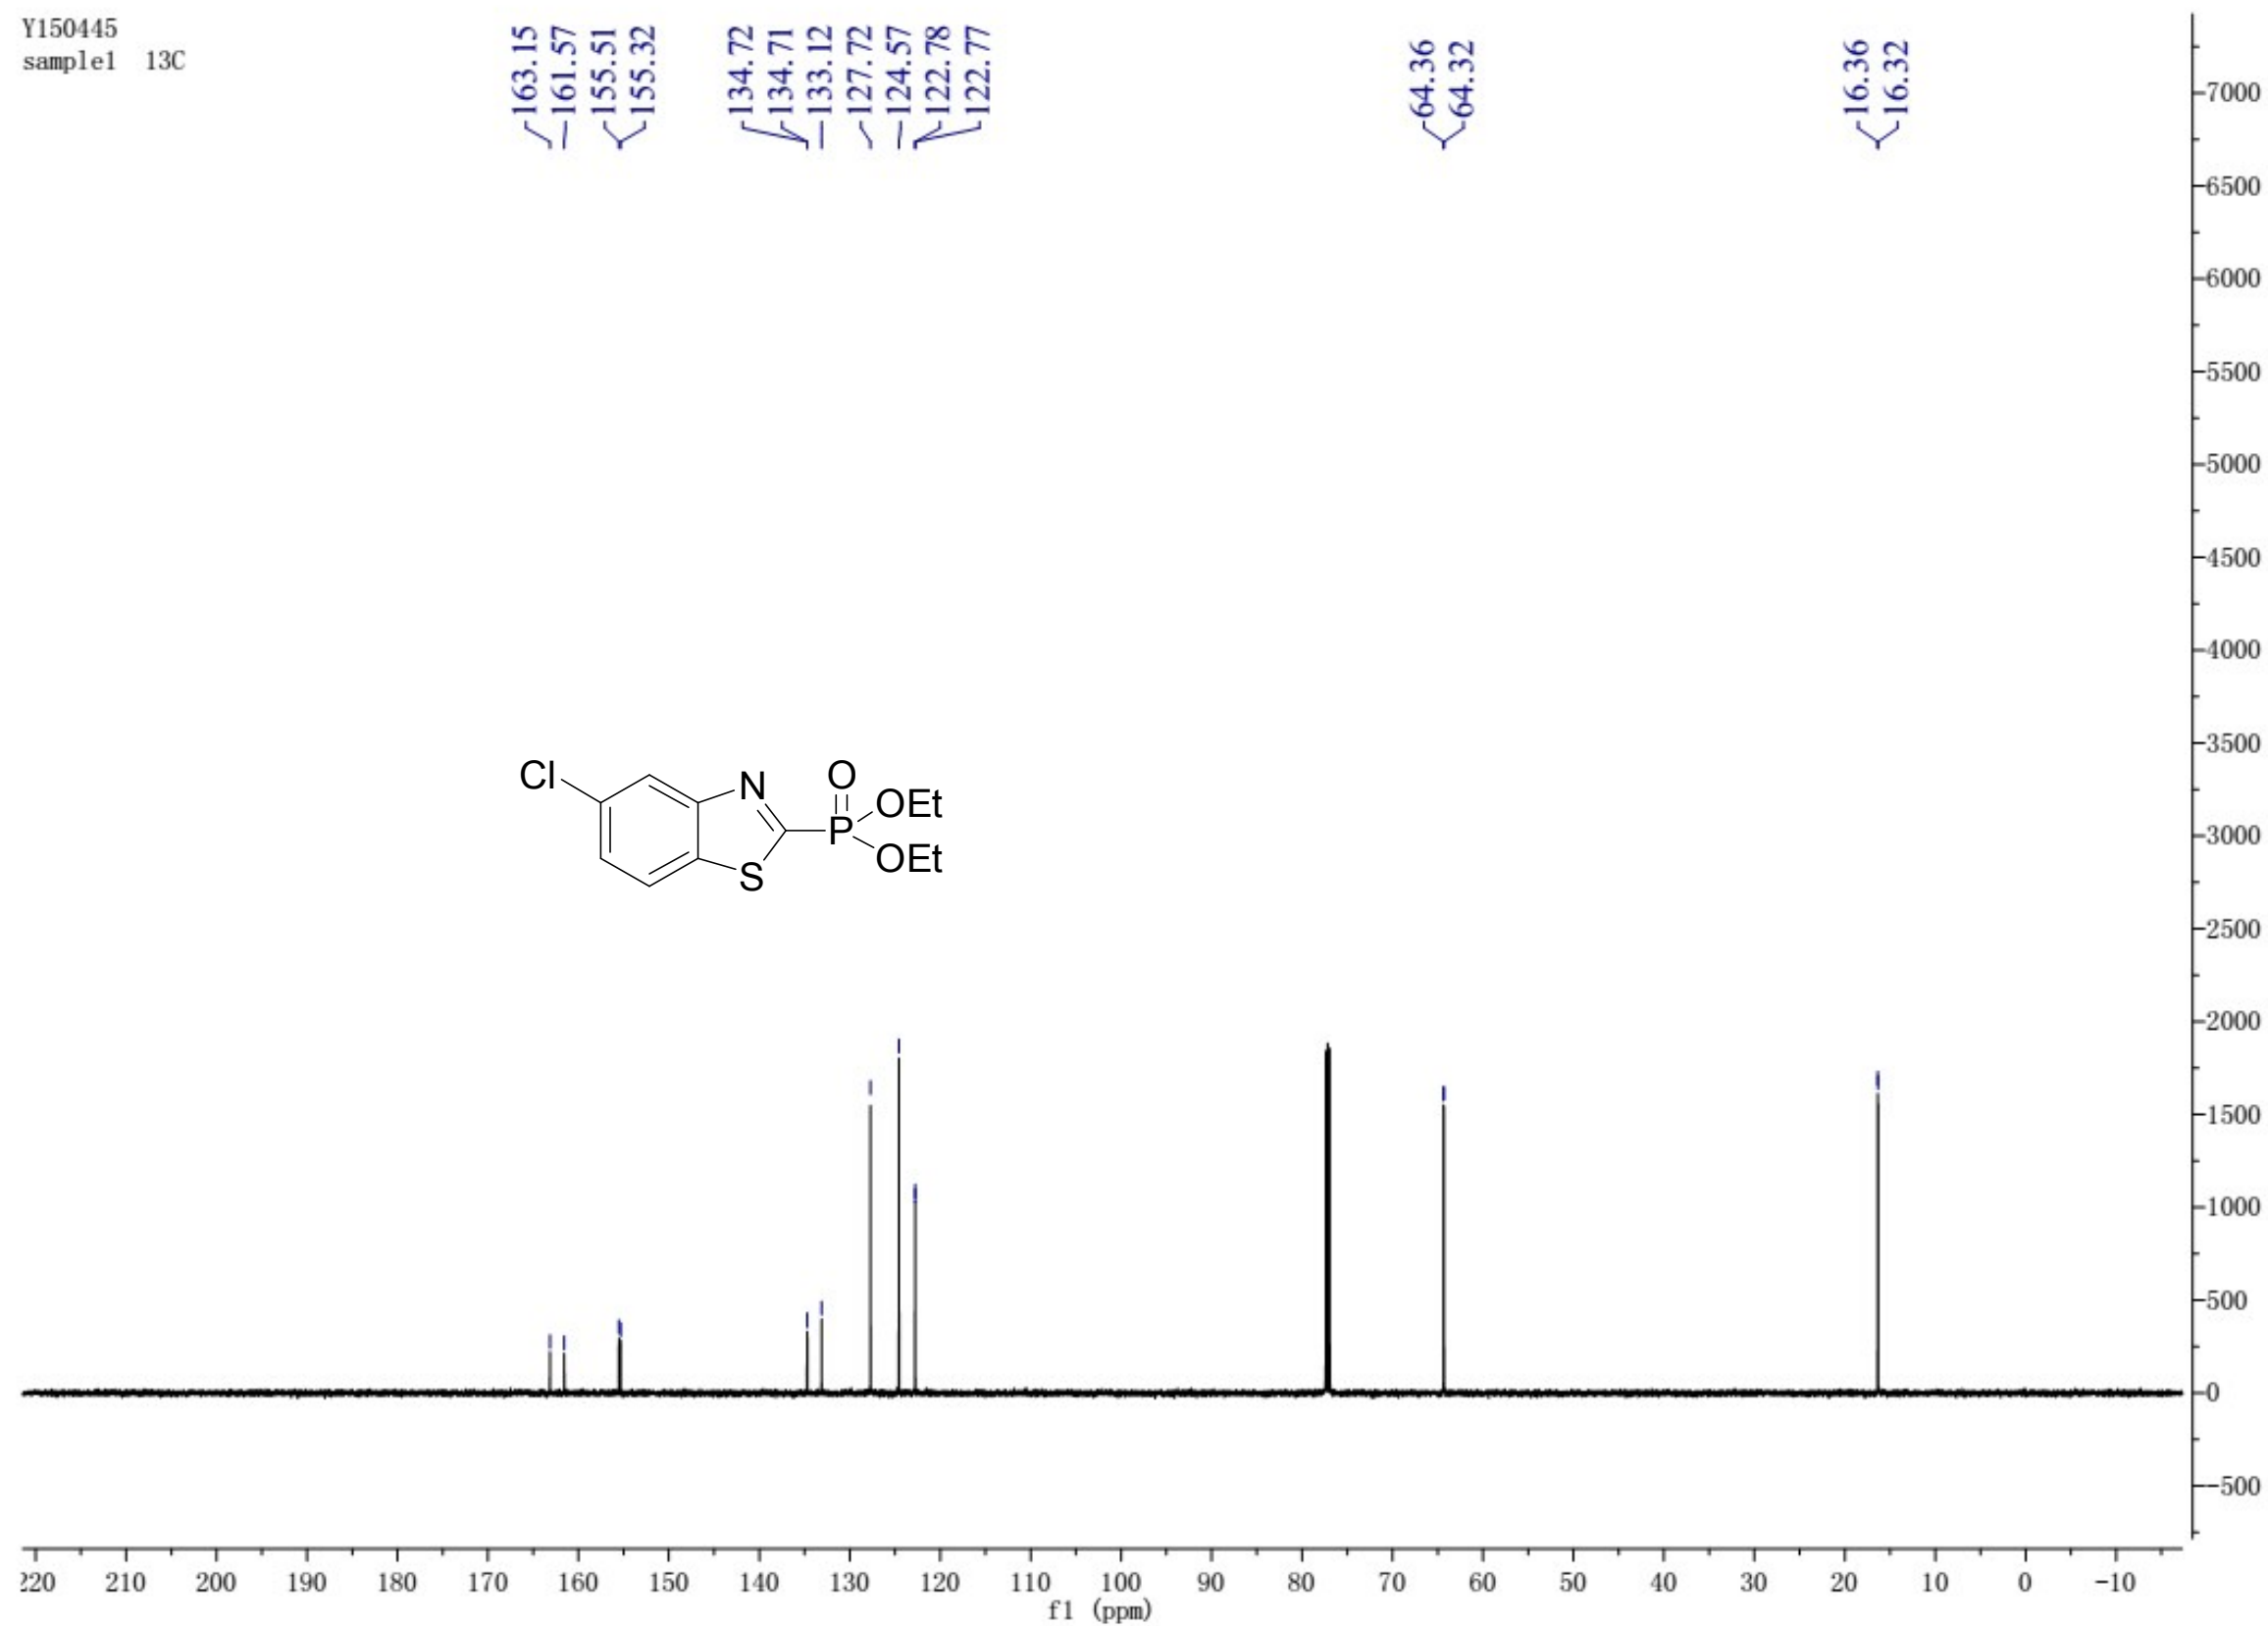

Y150445  
sample1 31P

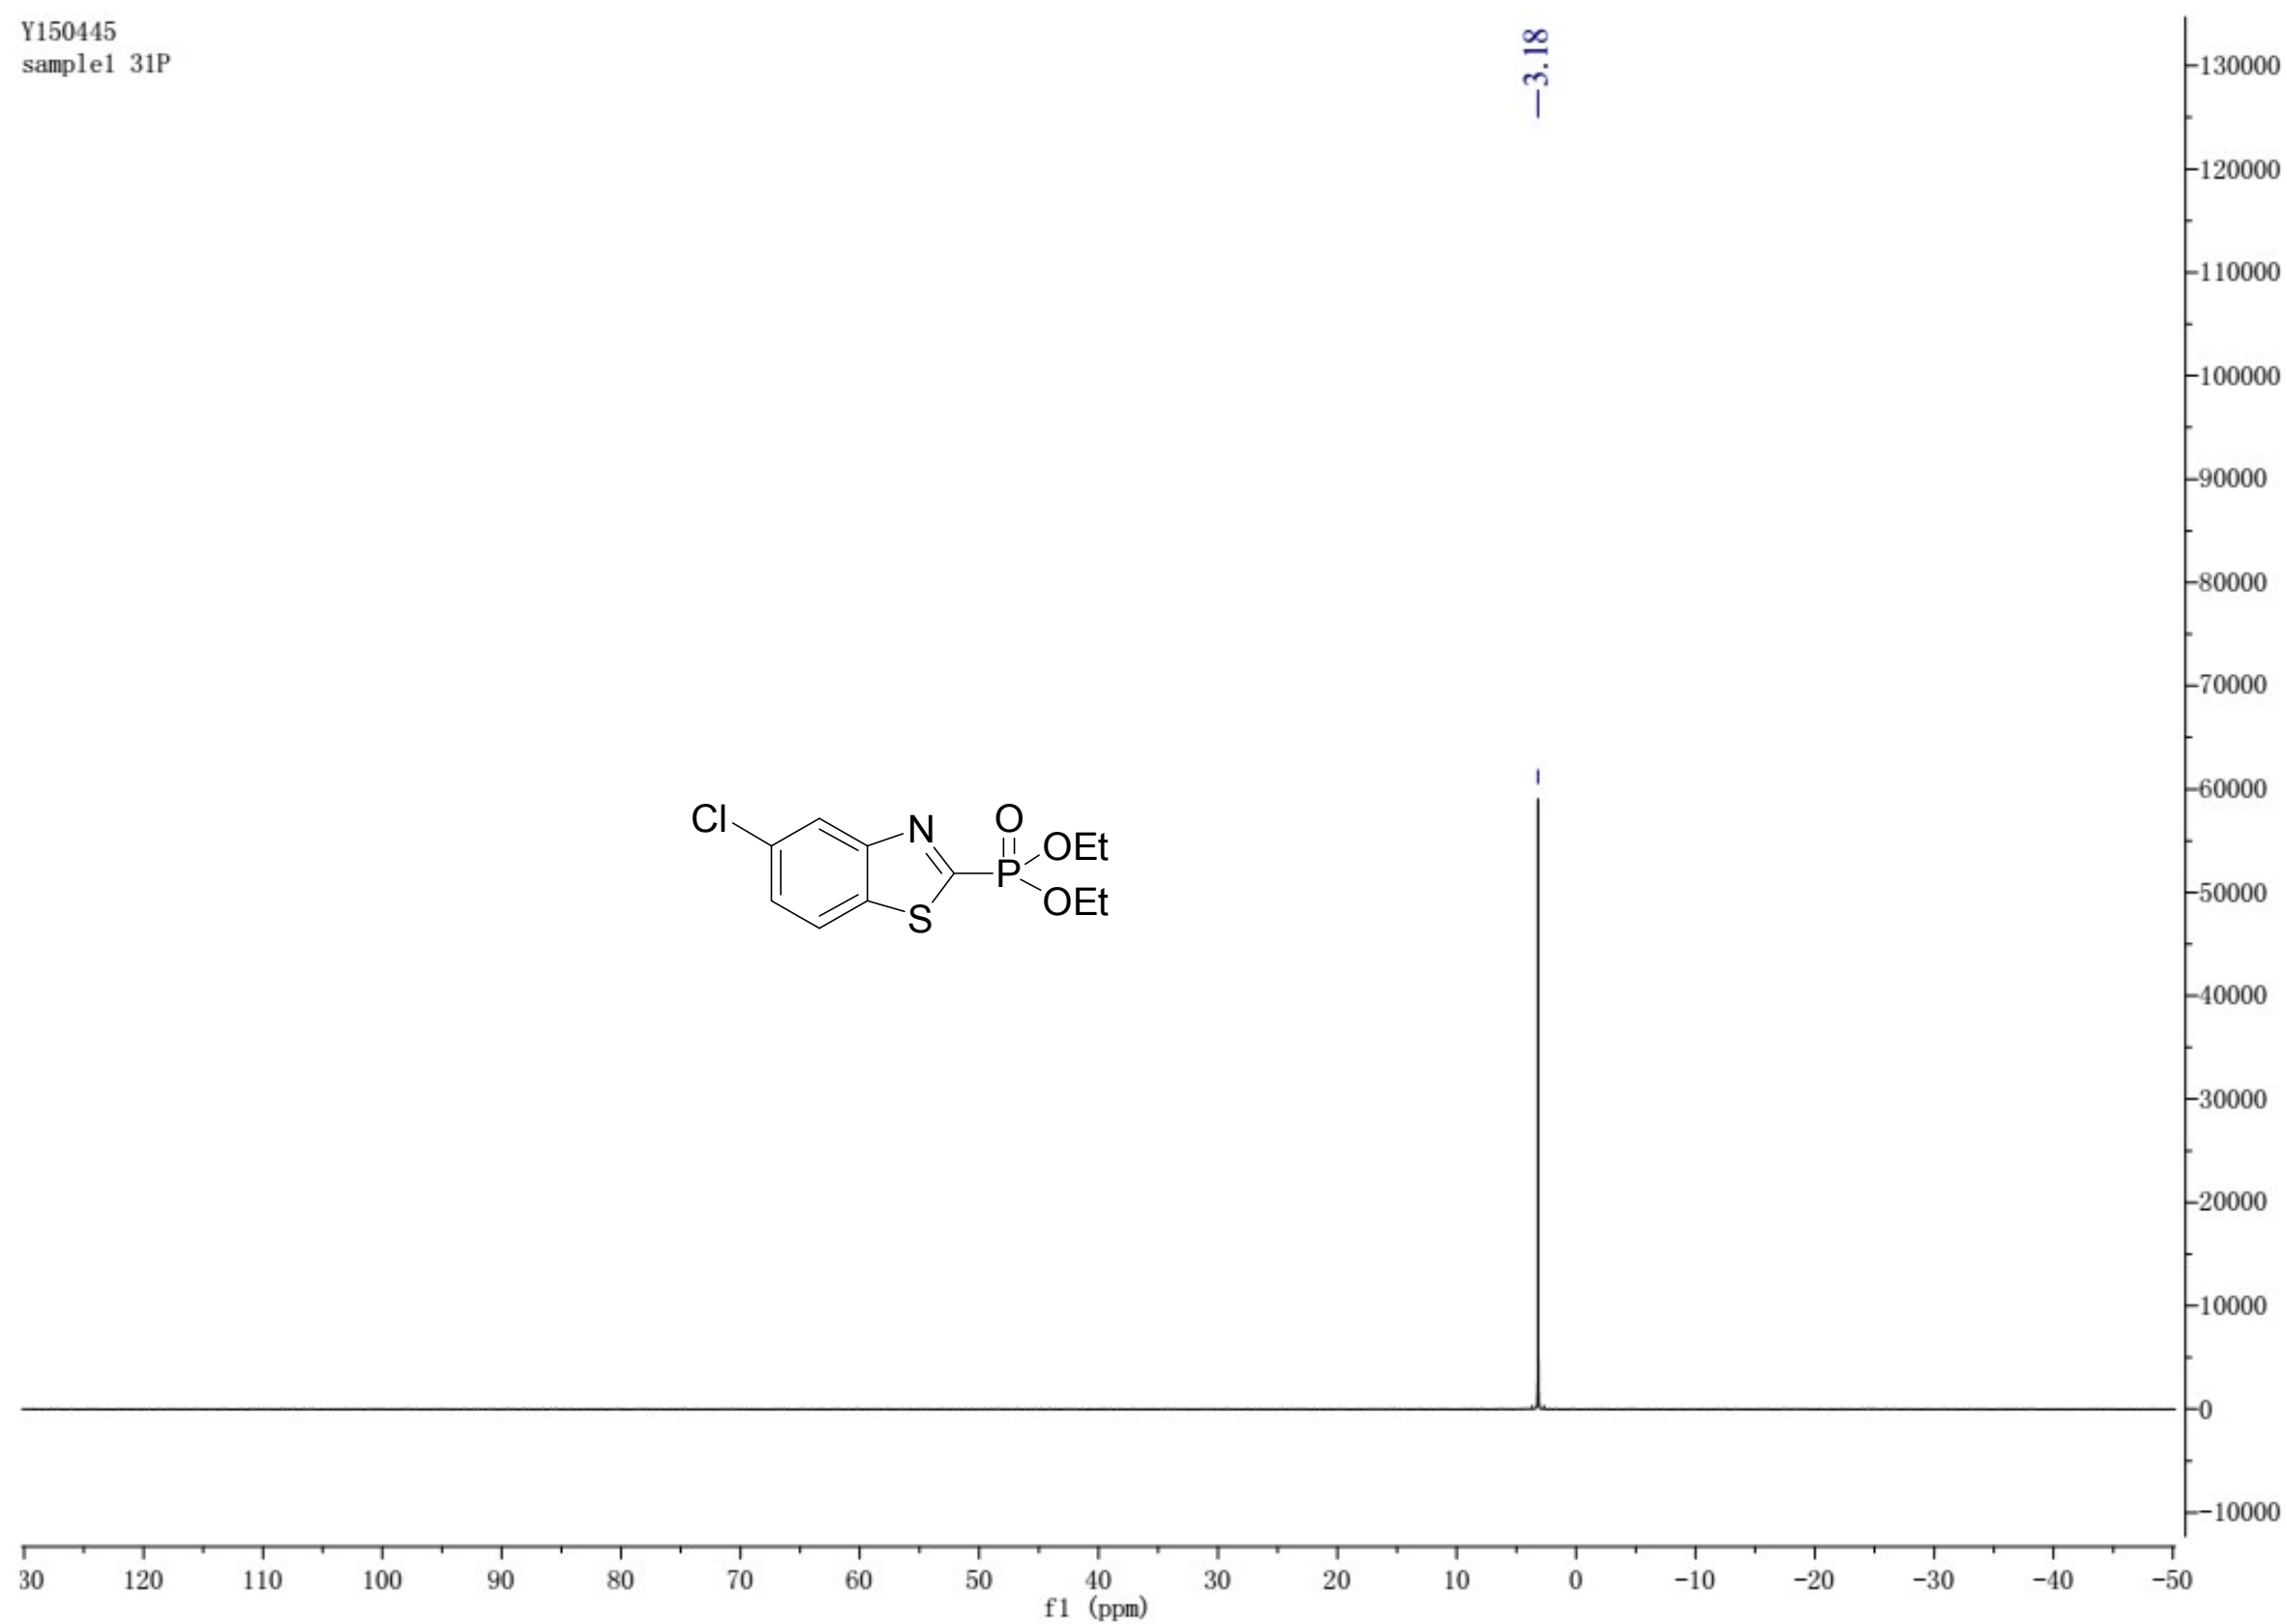

g-15-4-7-3  
Gradient Shimming

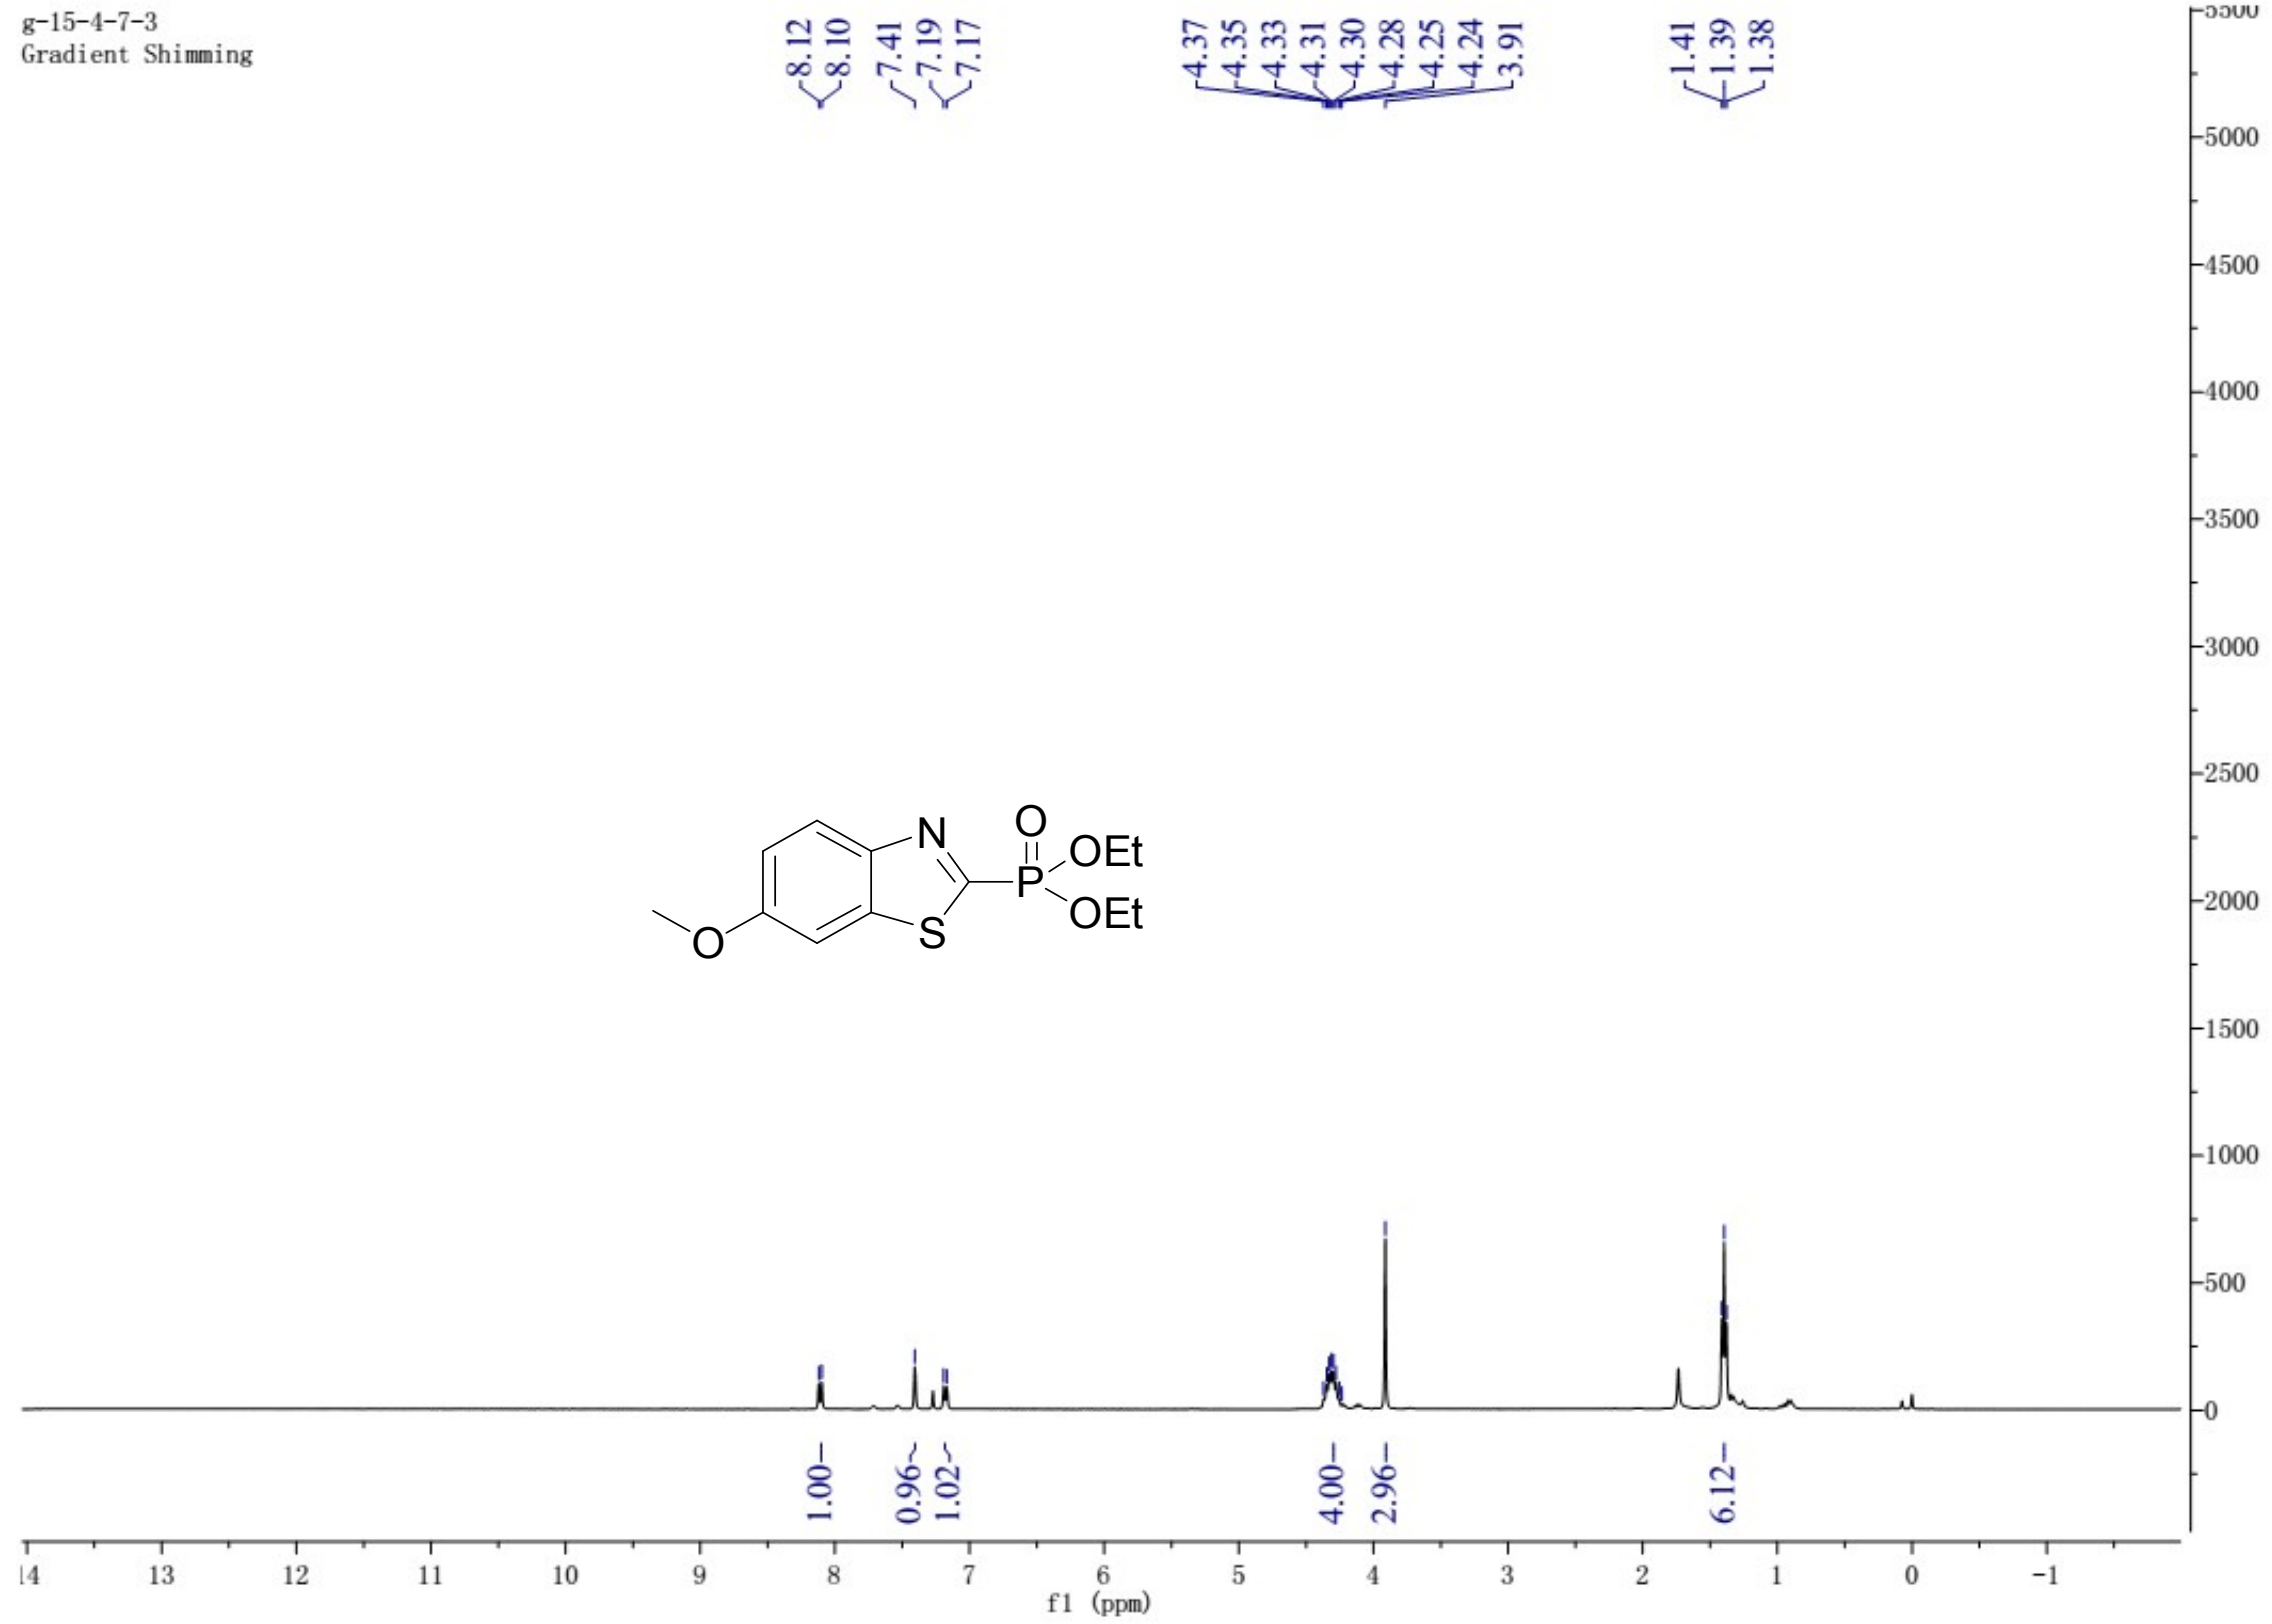

g-14-12-15-2  
Gradient Shimming

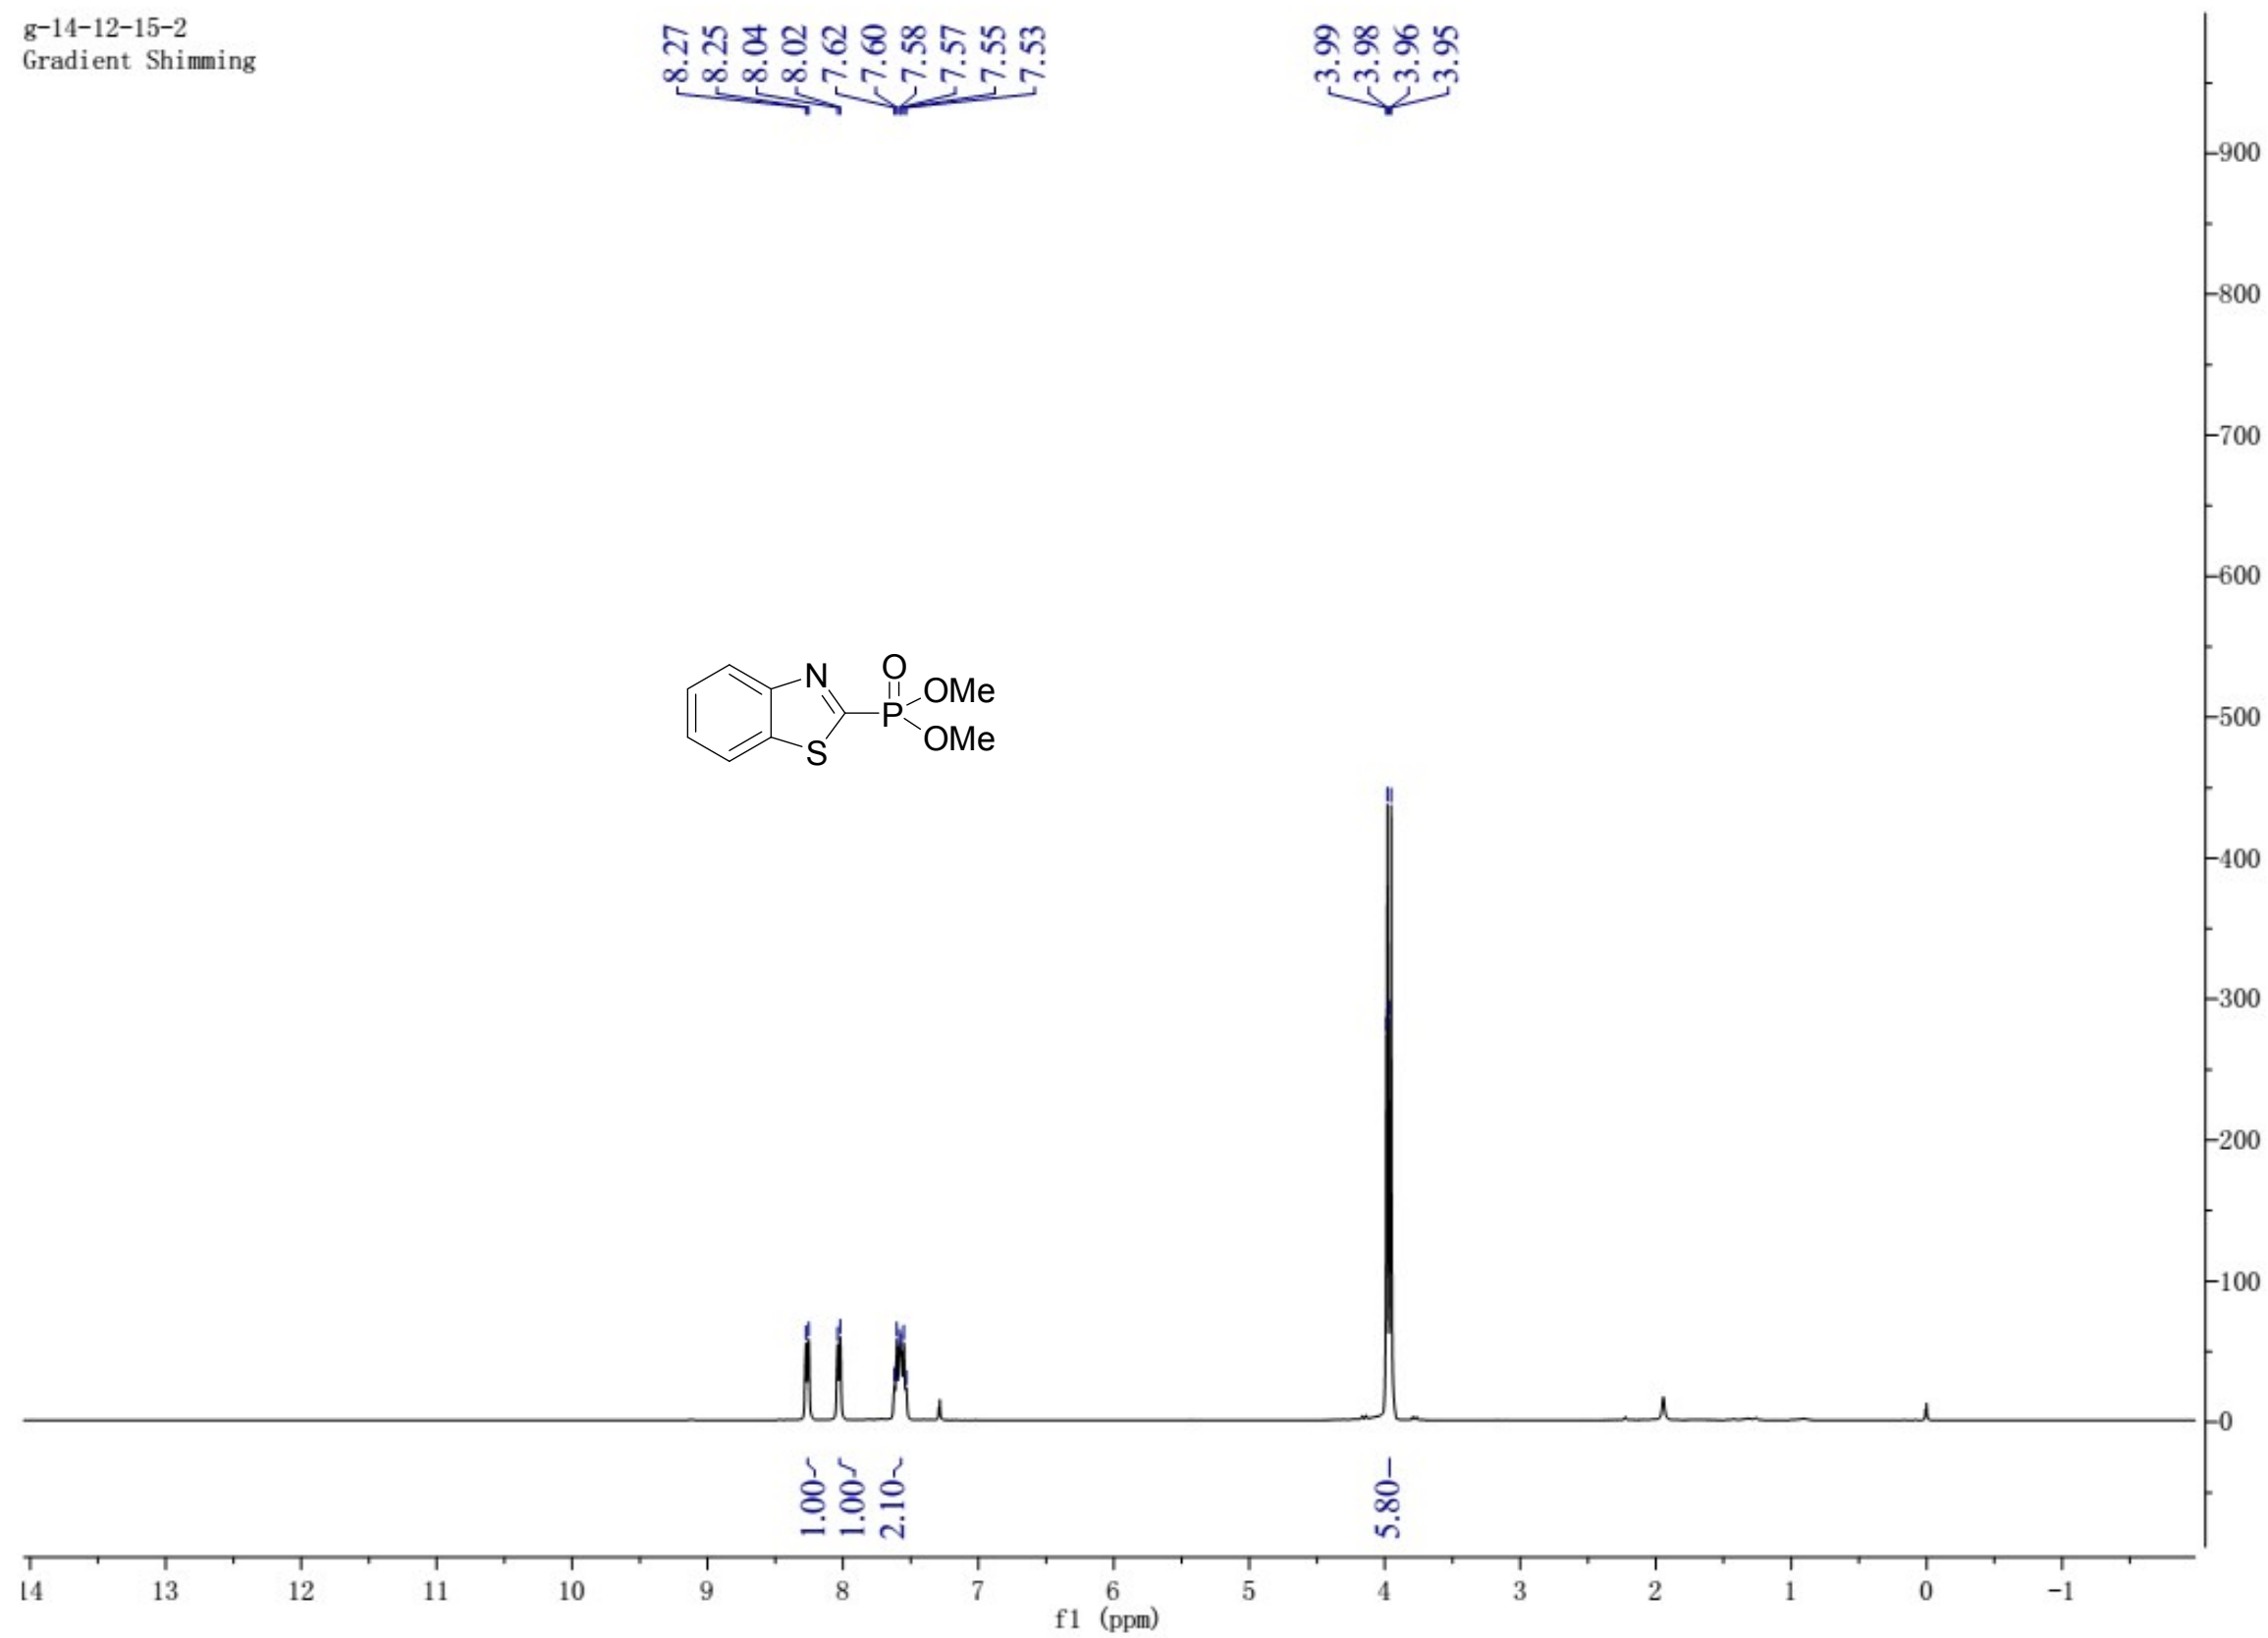

Y150059  
sample6 13C

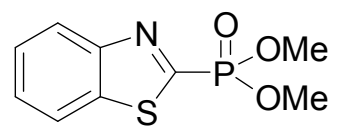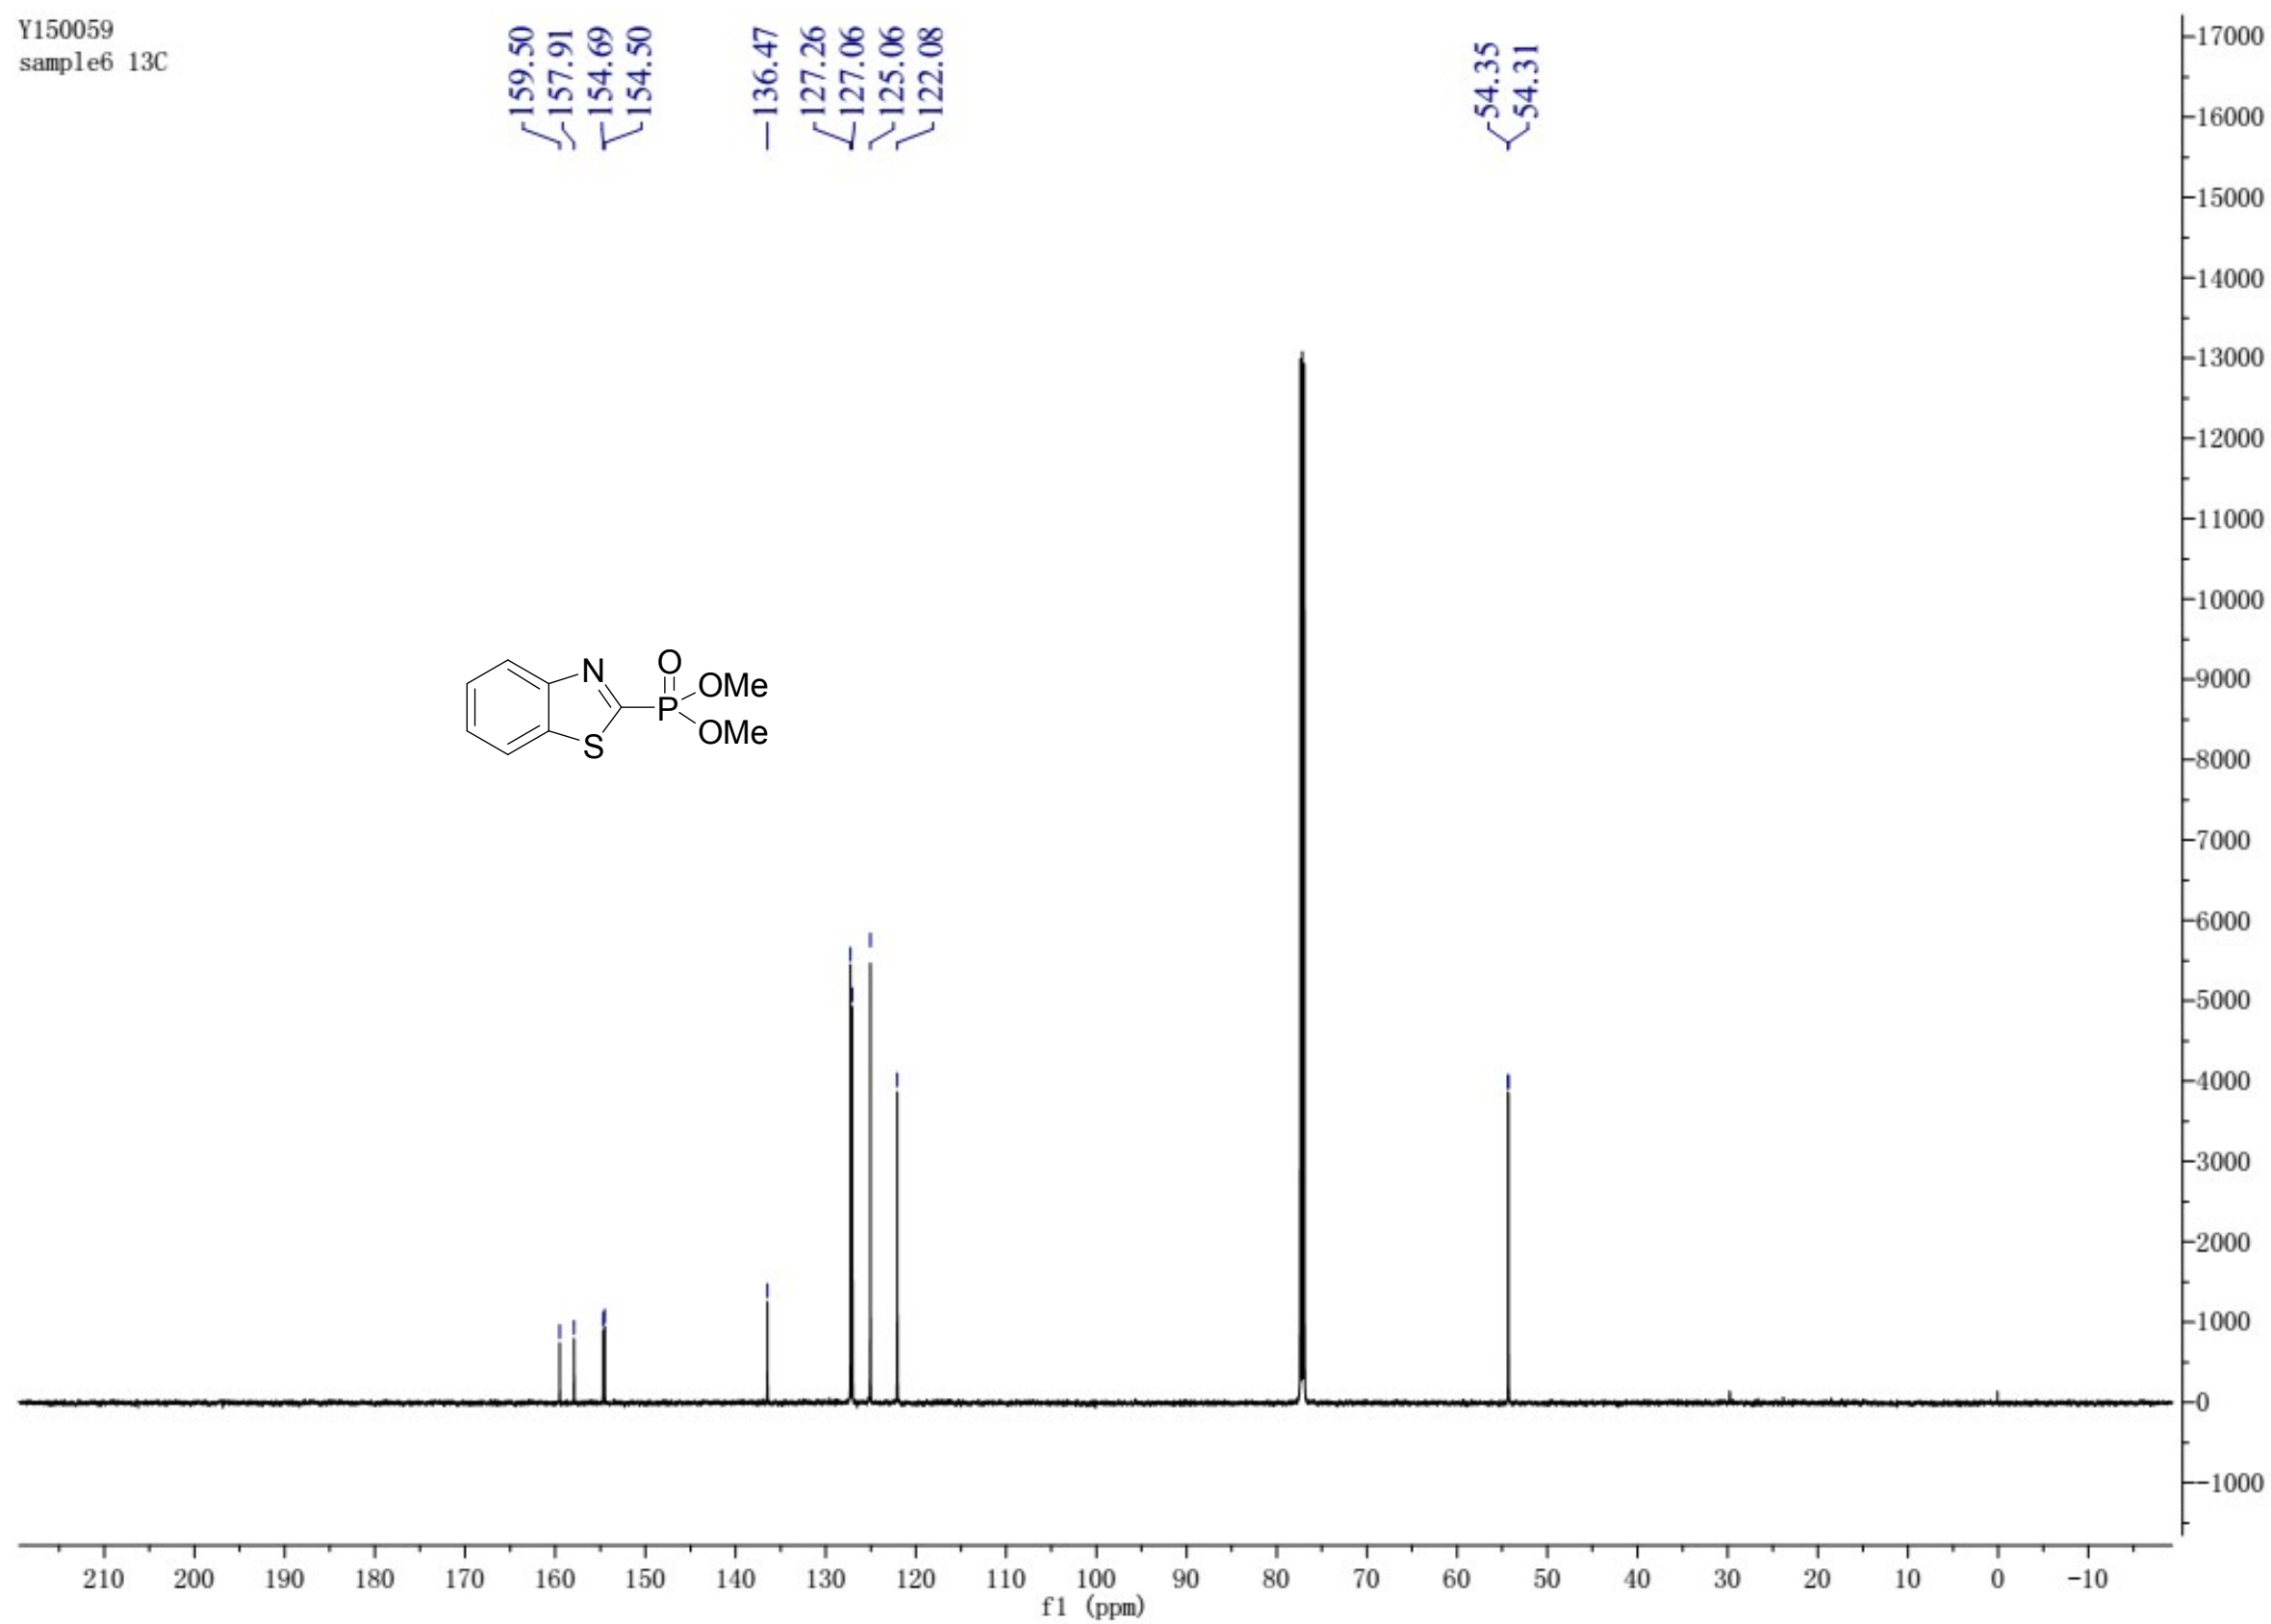

yr-4

-6.71

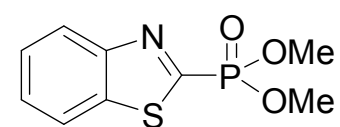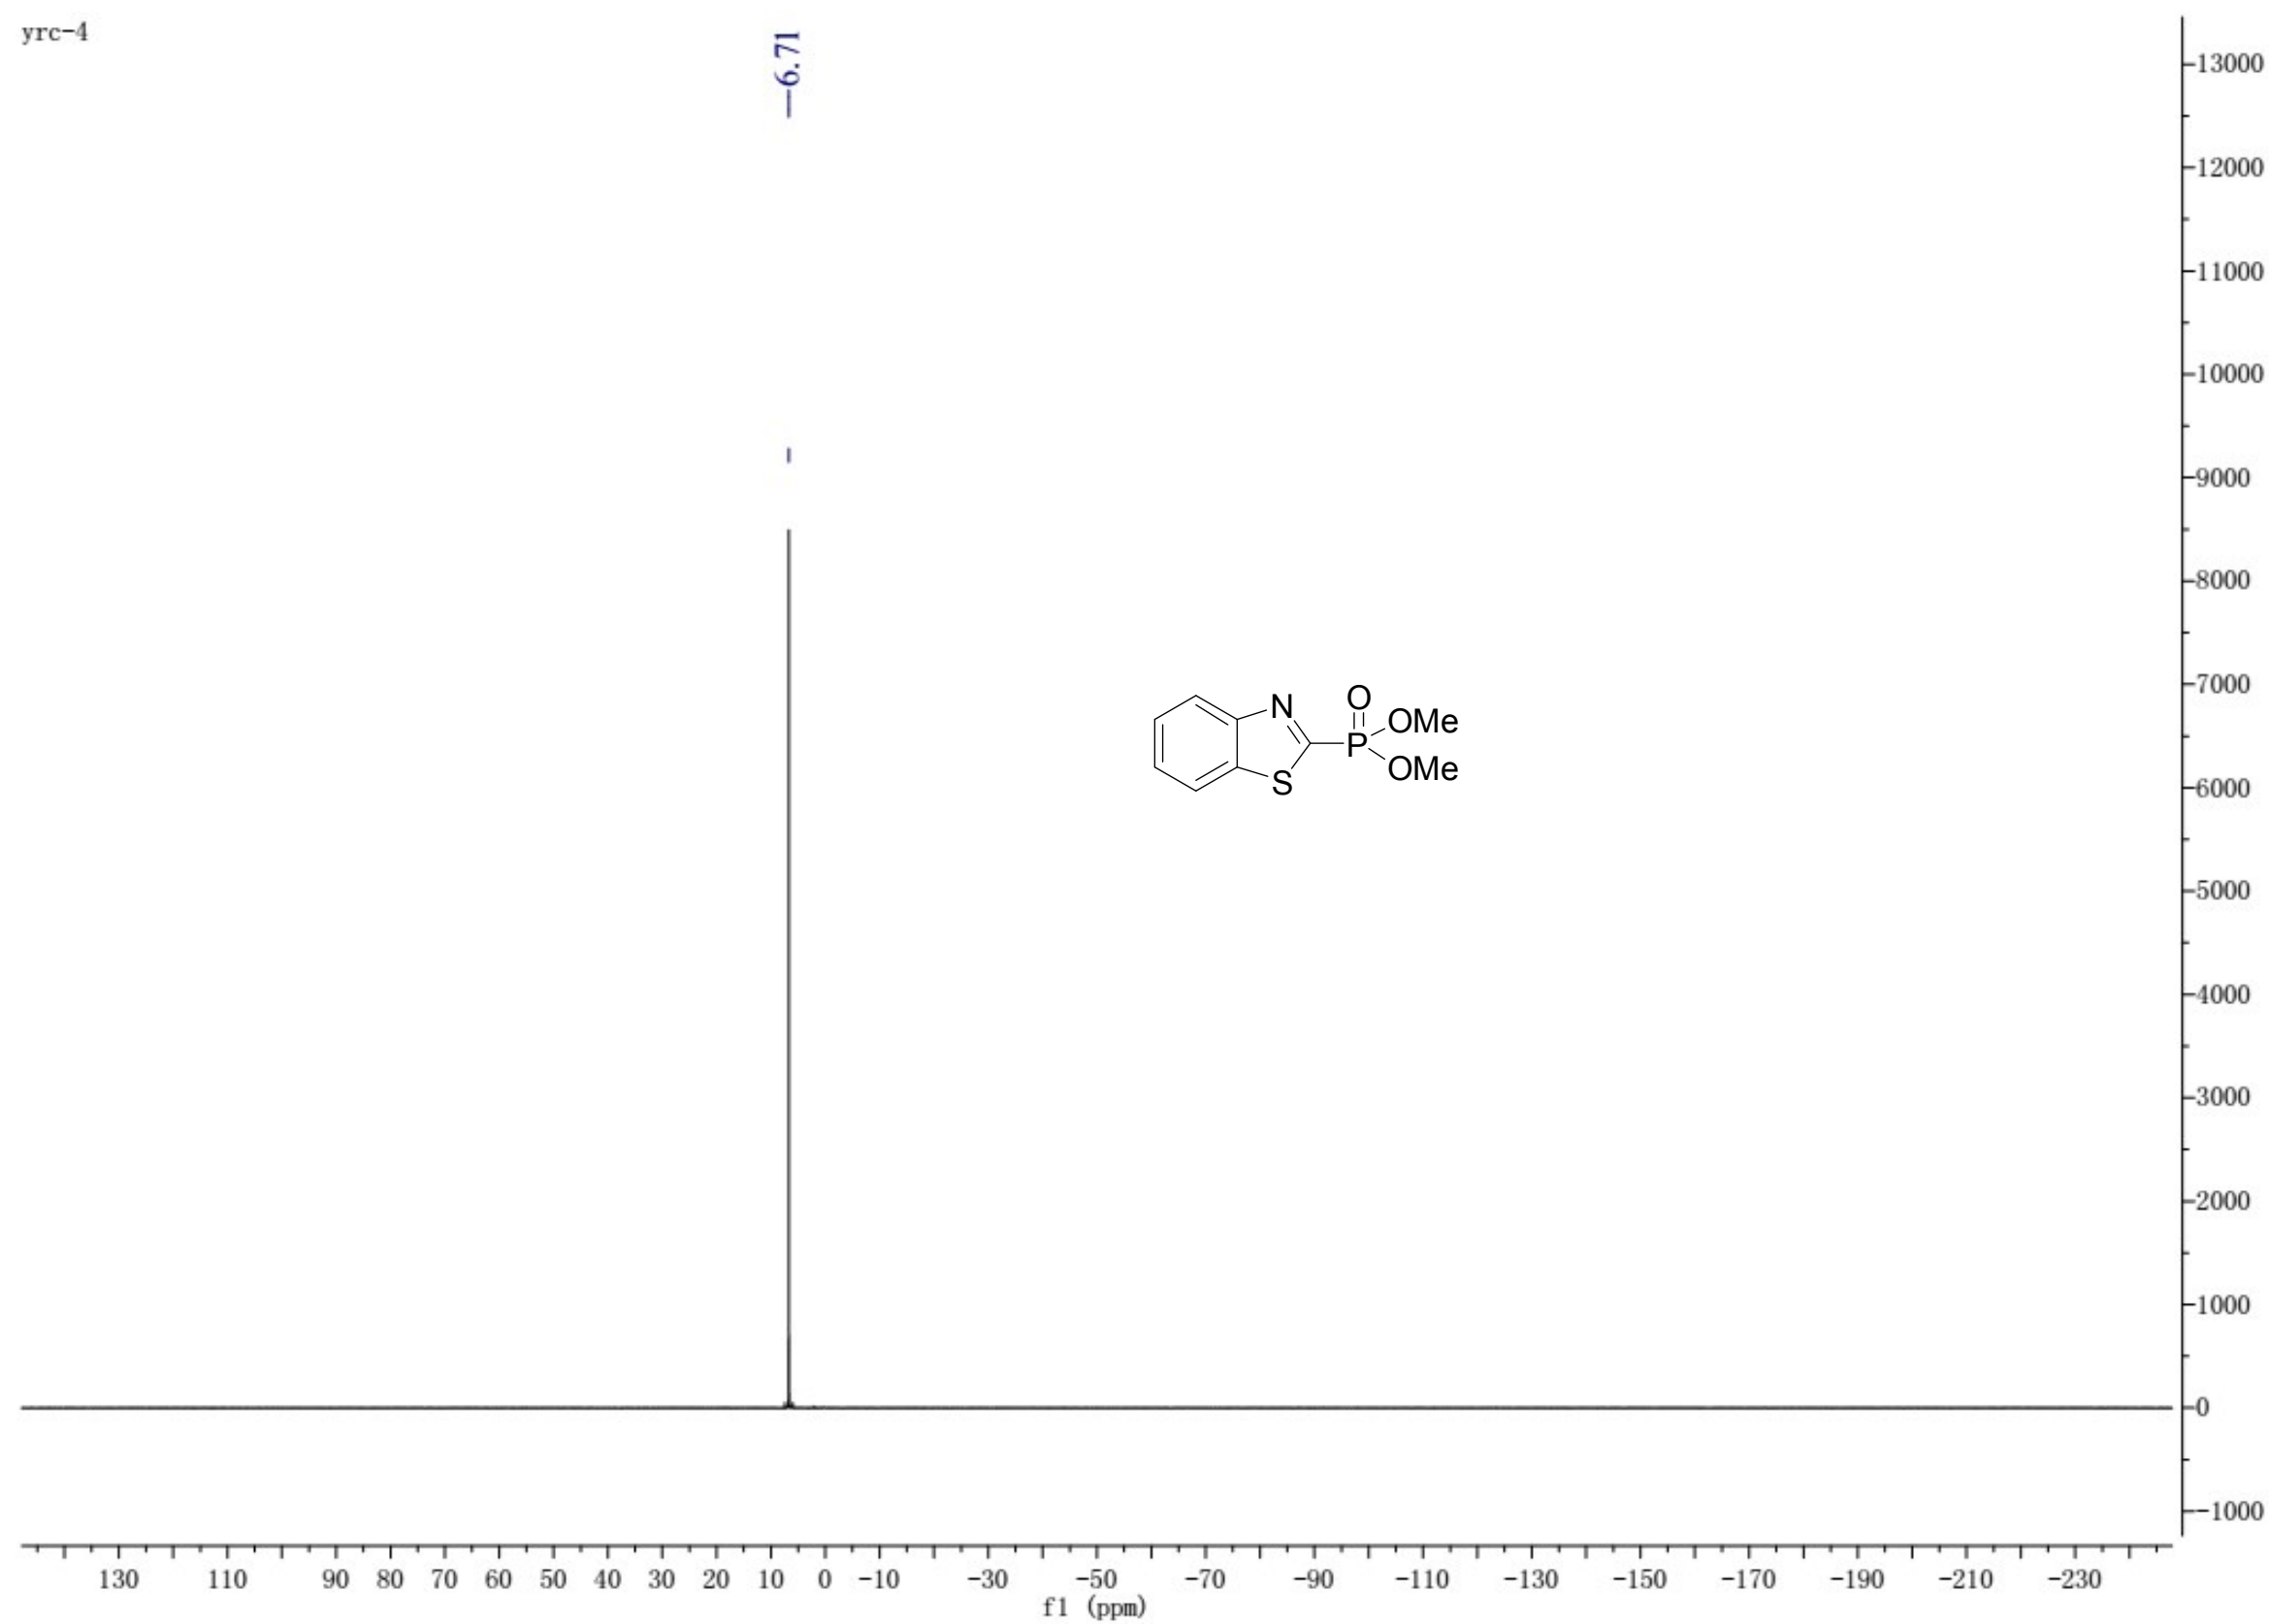

g-14-12-15-1  
Gradient Shimming

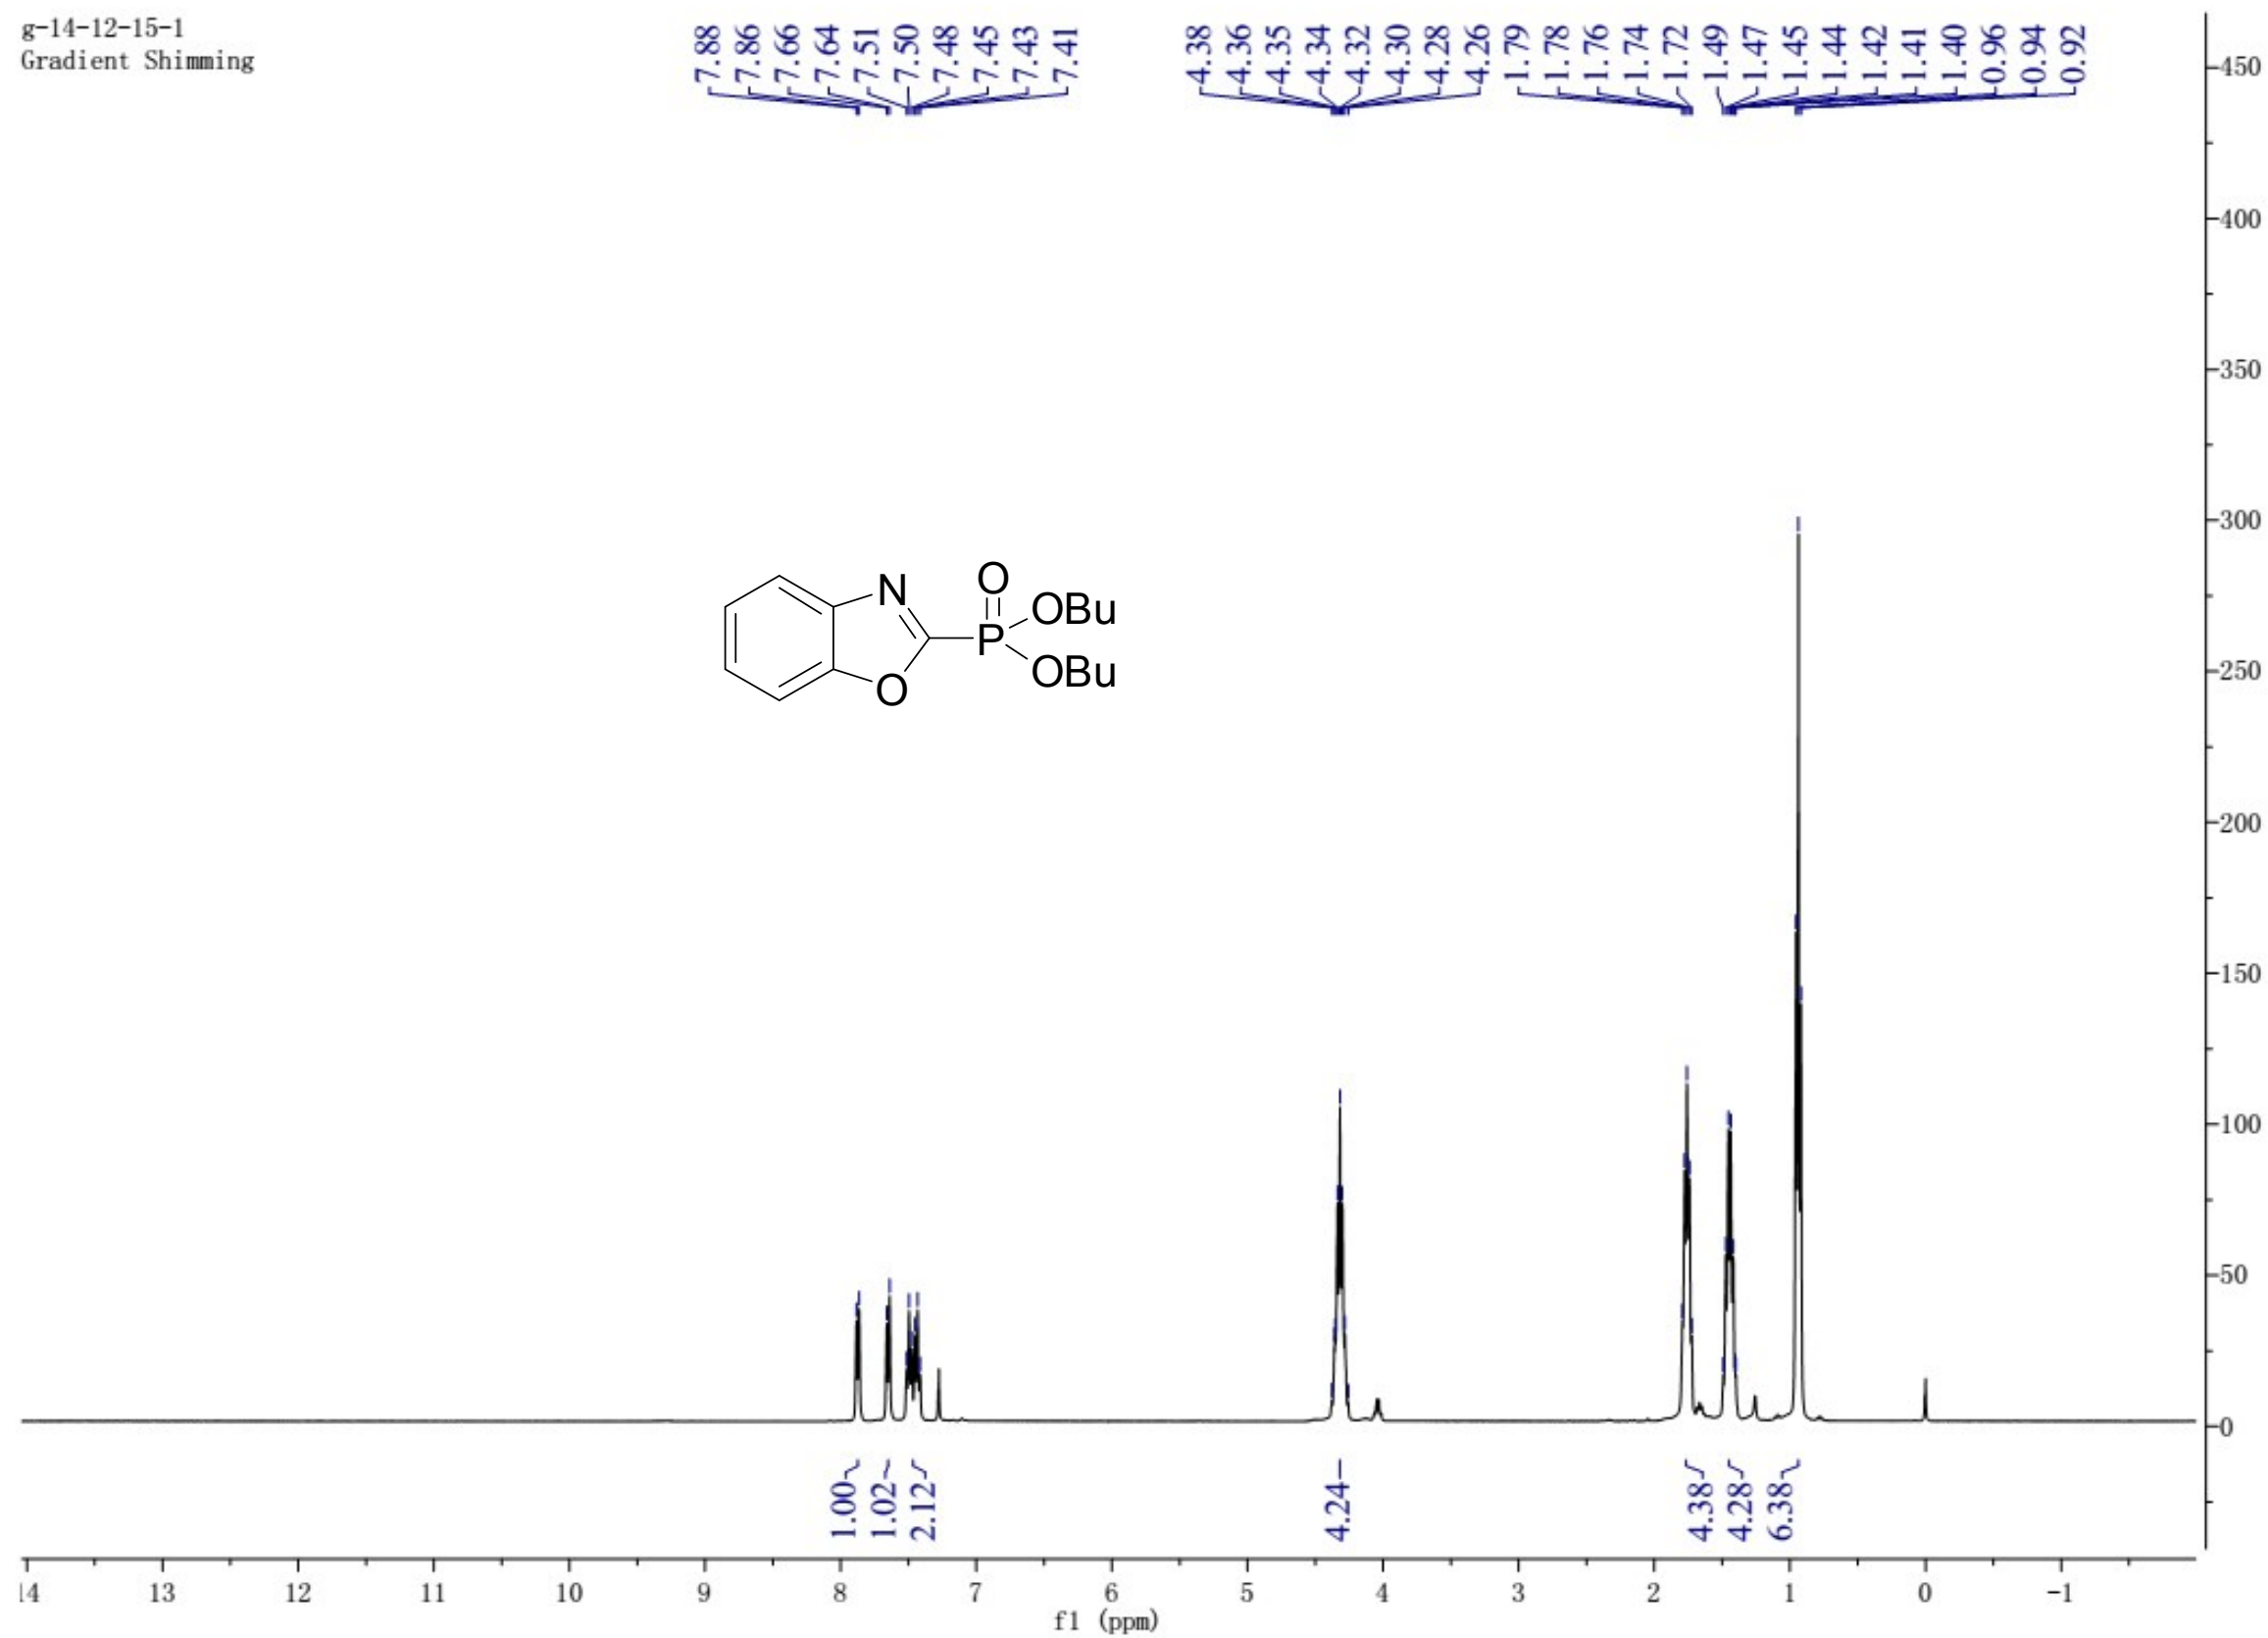

Y150059  
sample5 13C

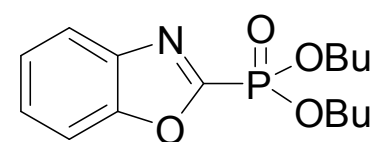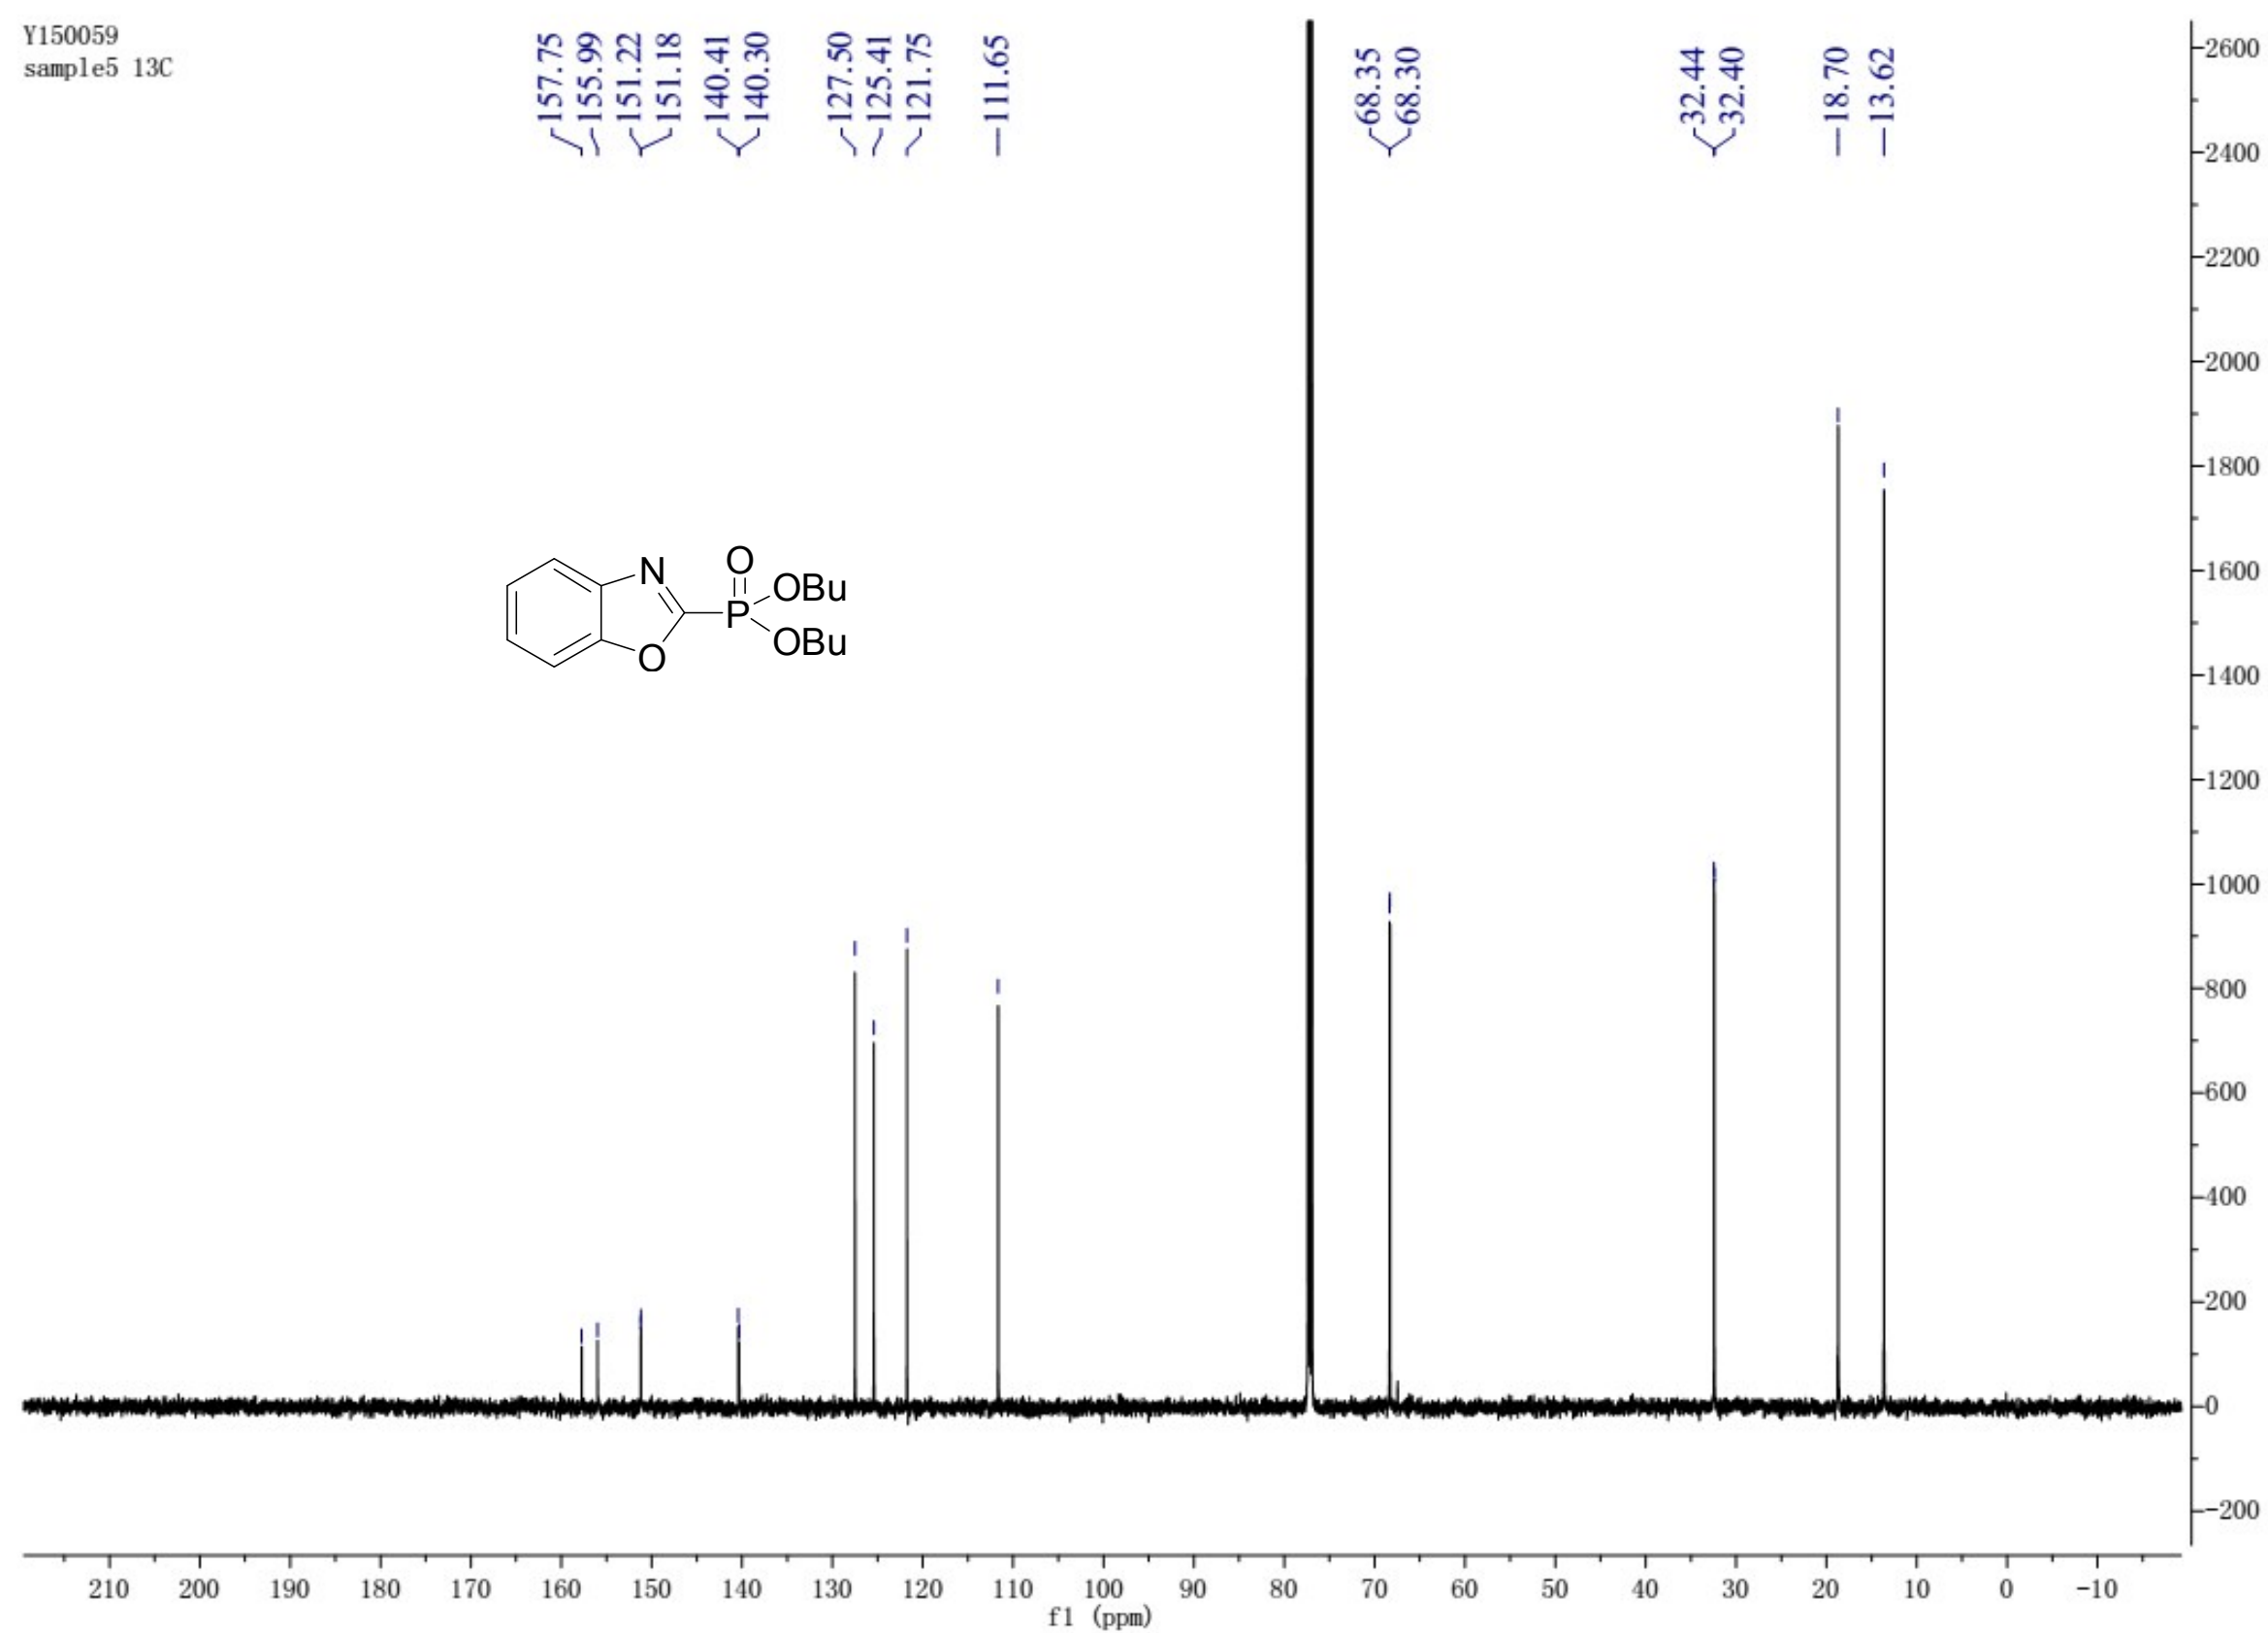

yr-1

1.95

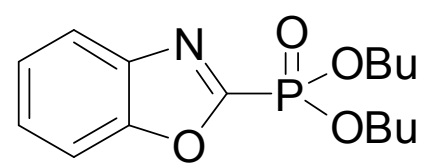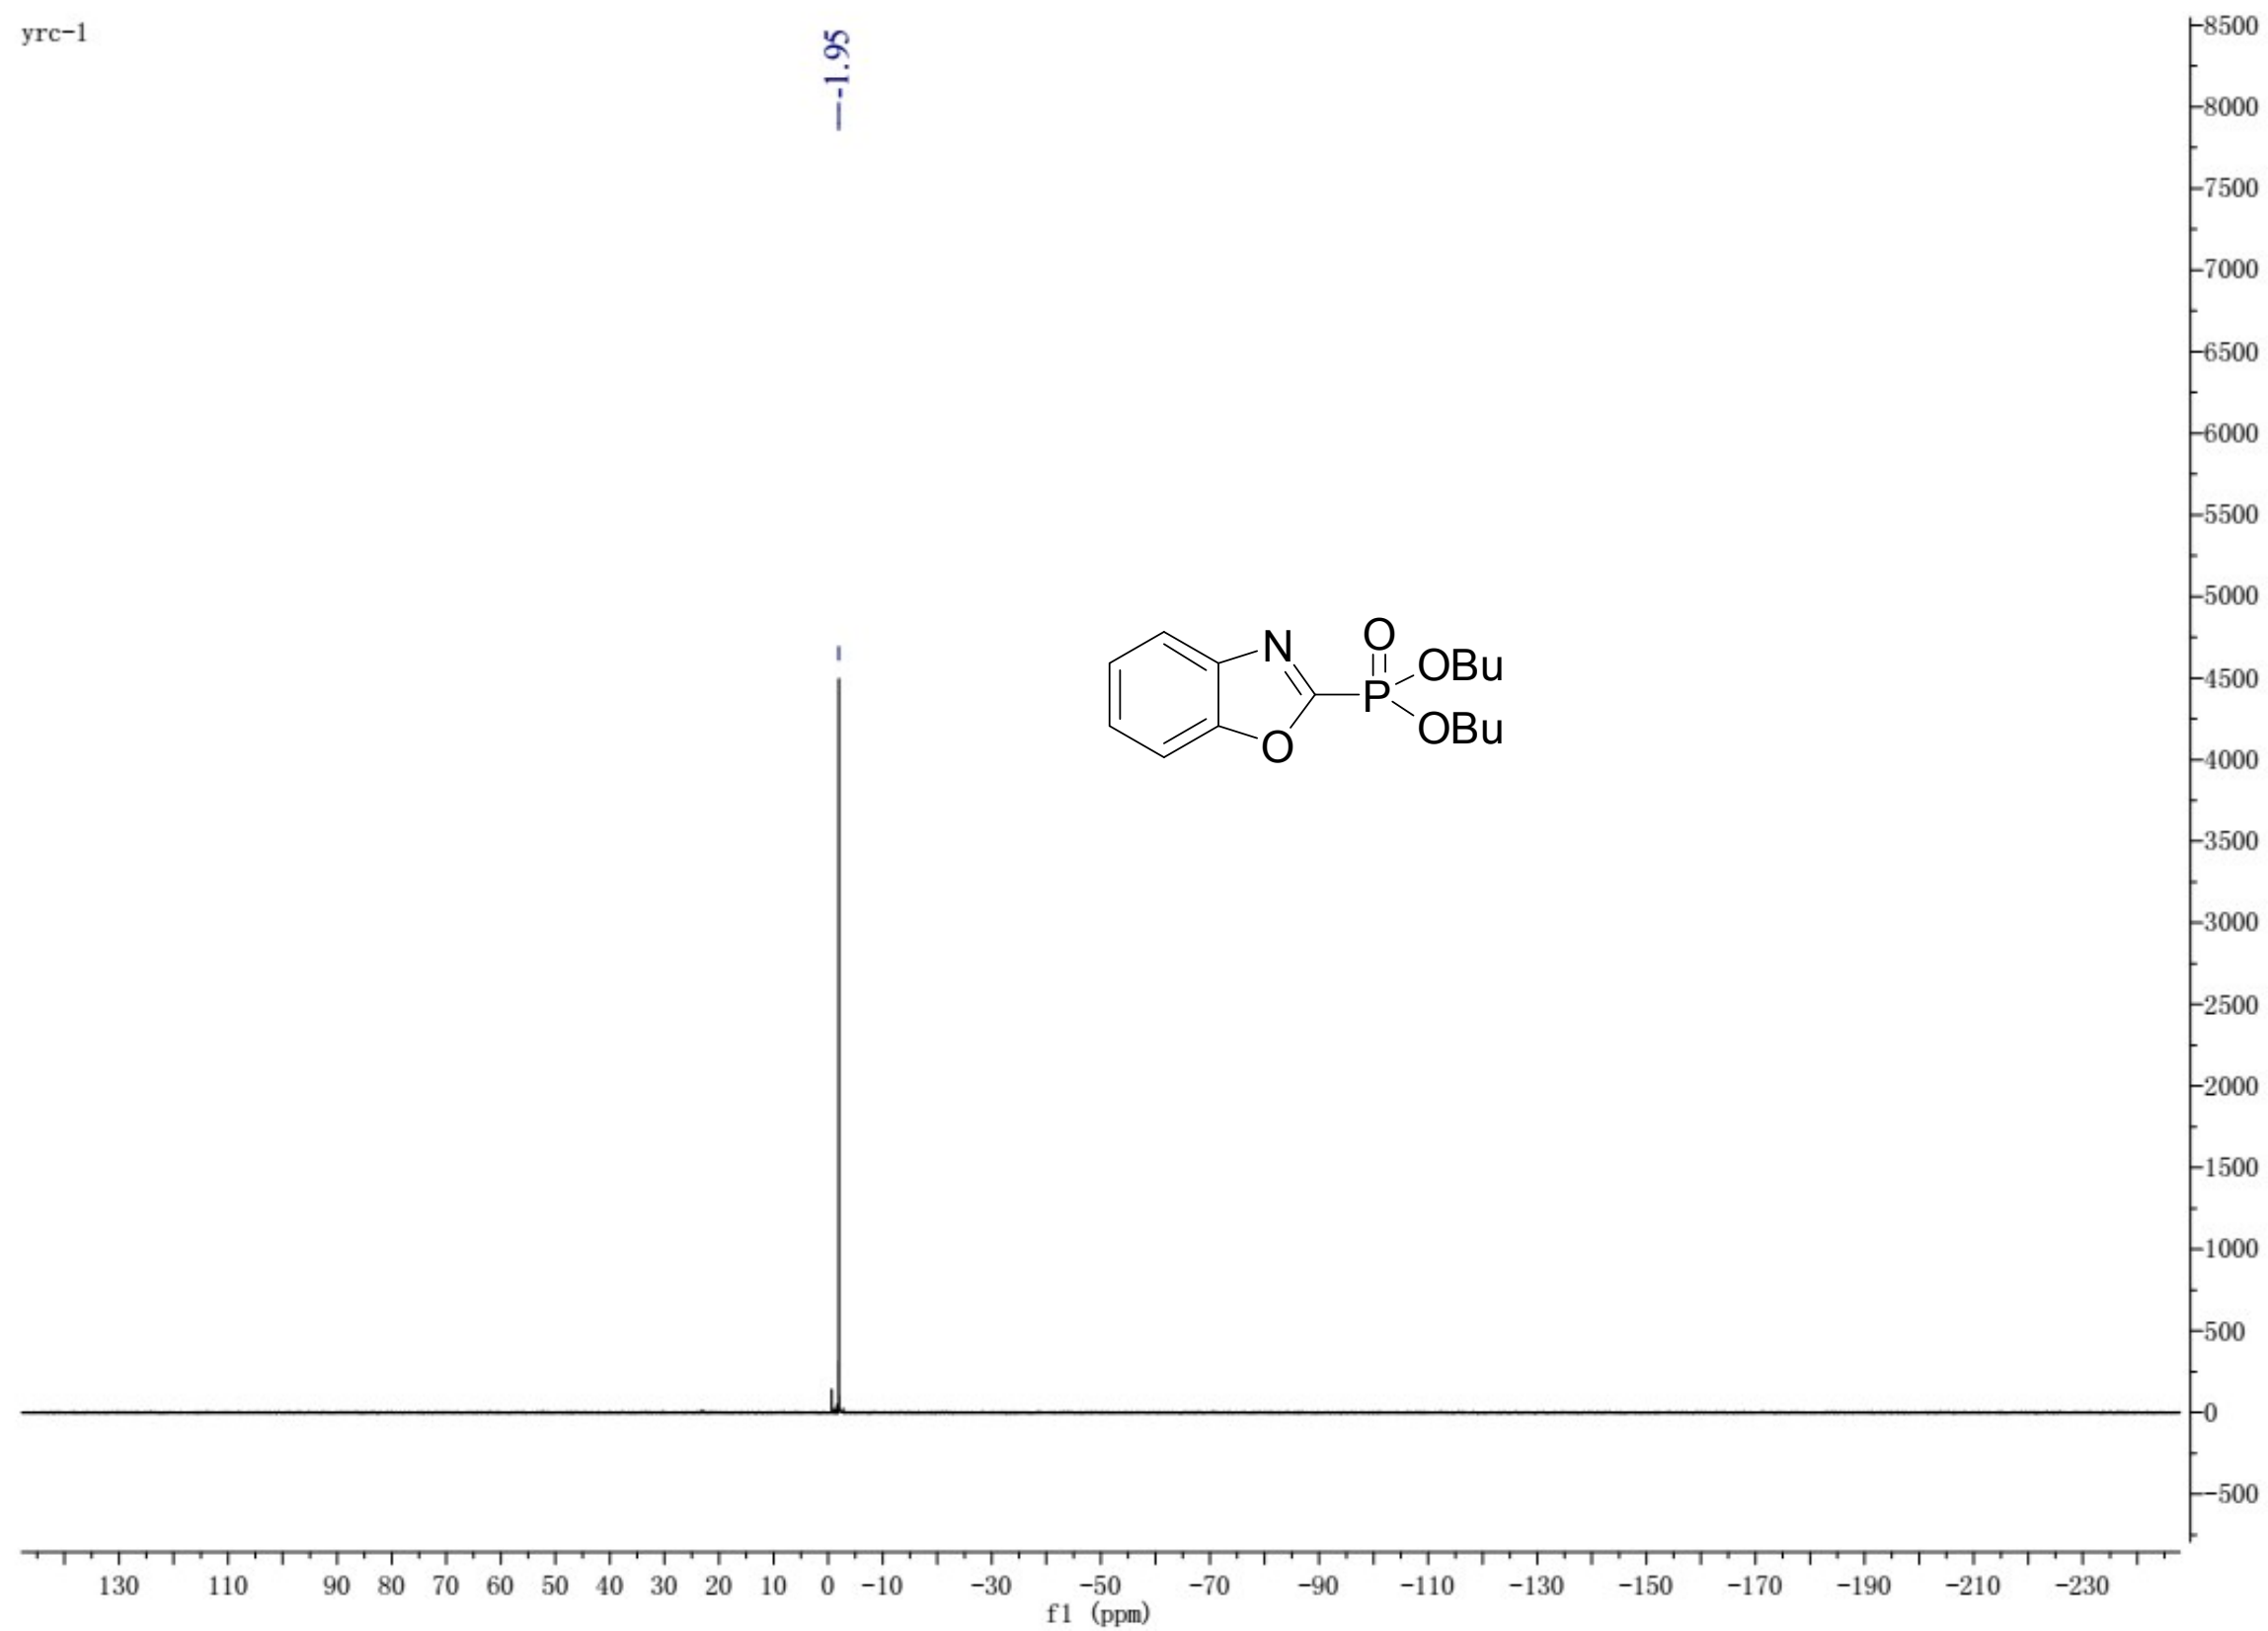

g-14-12-19-2  
Gradient Shimming

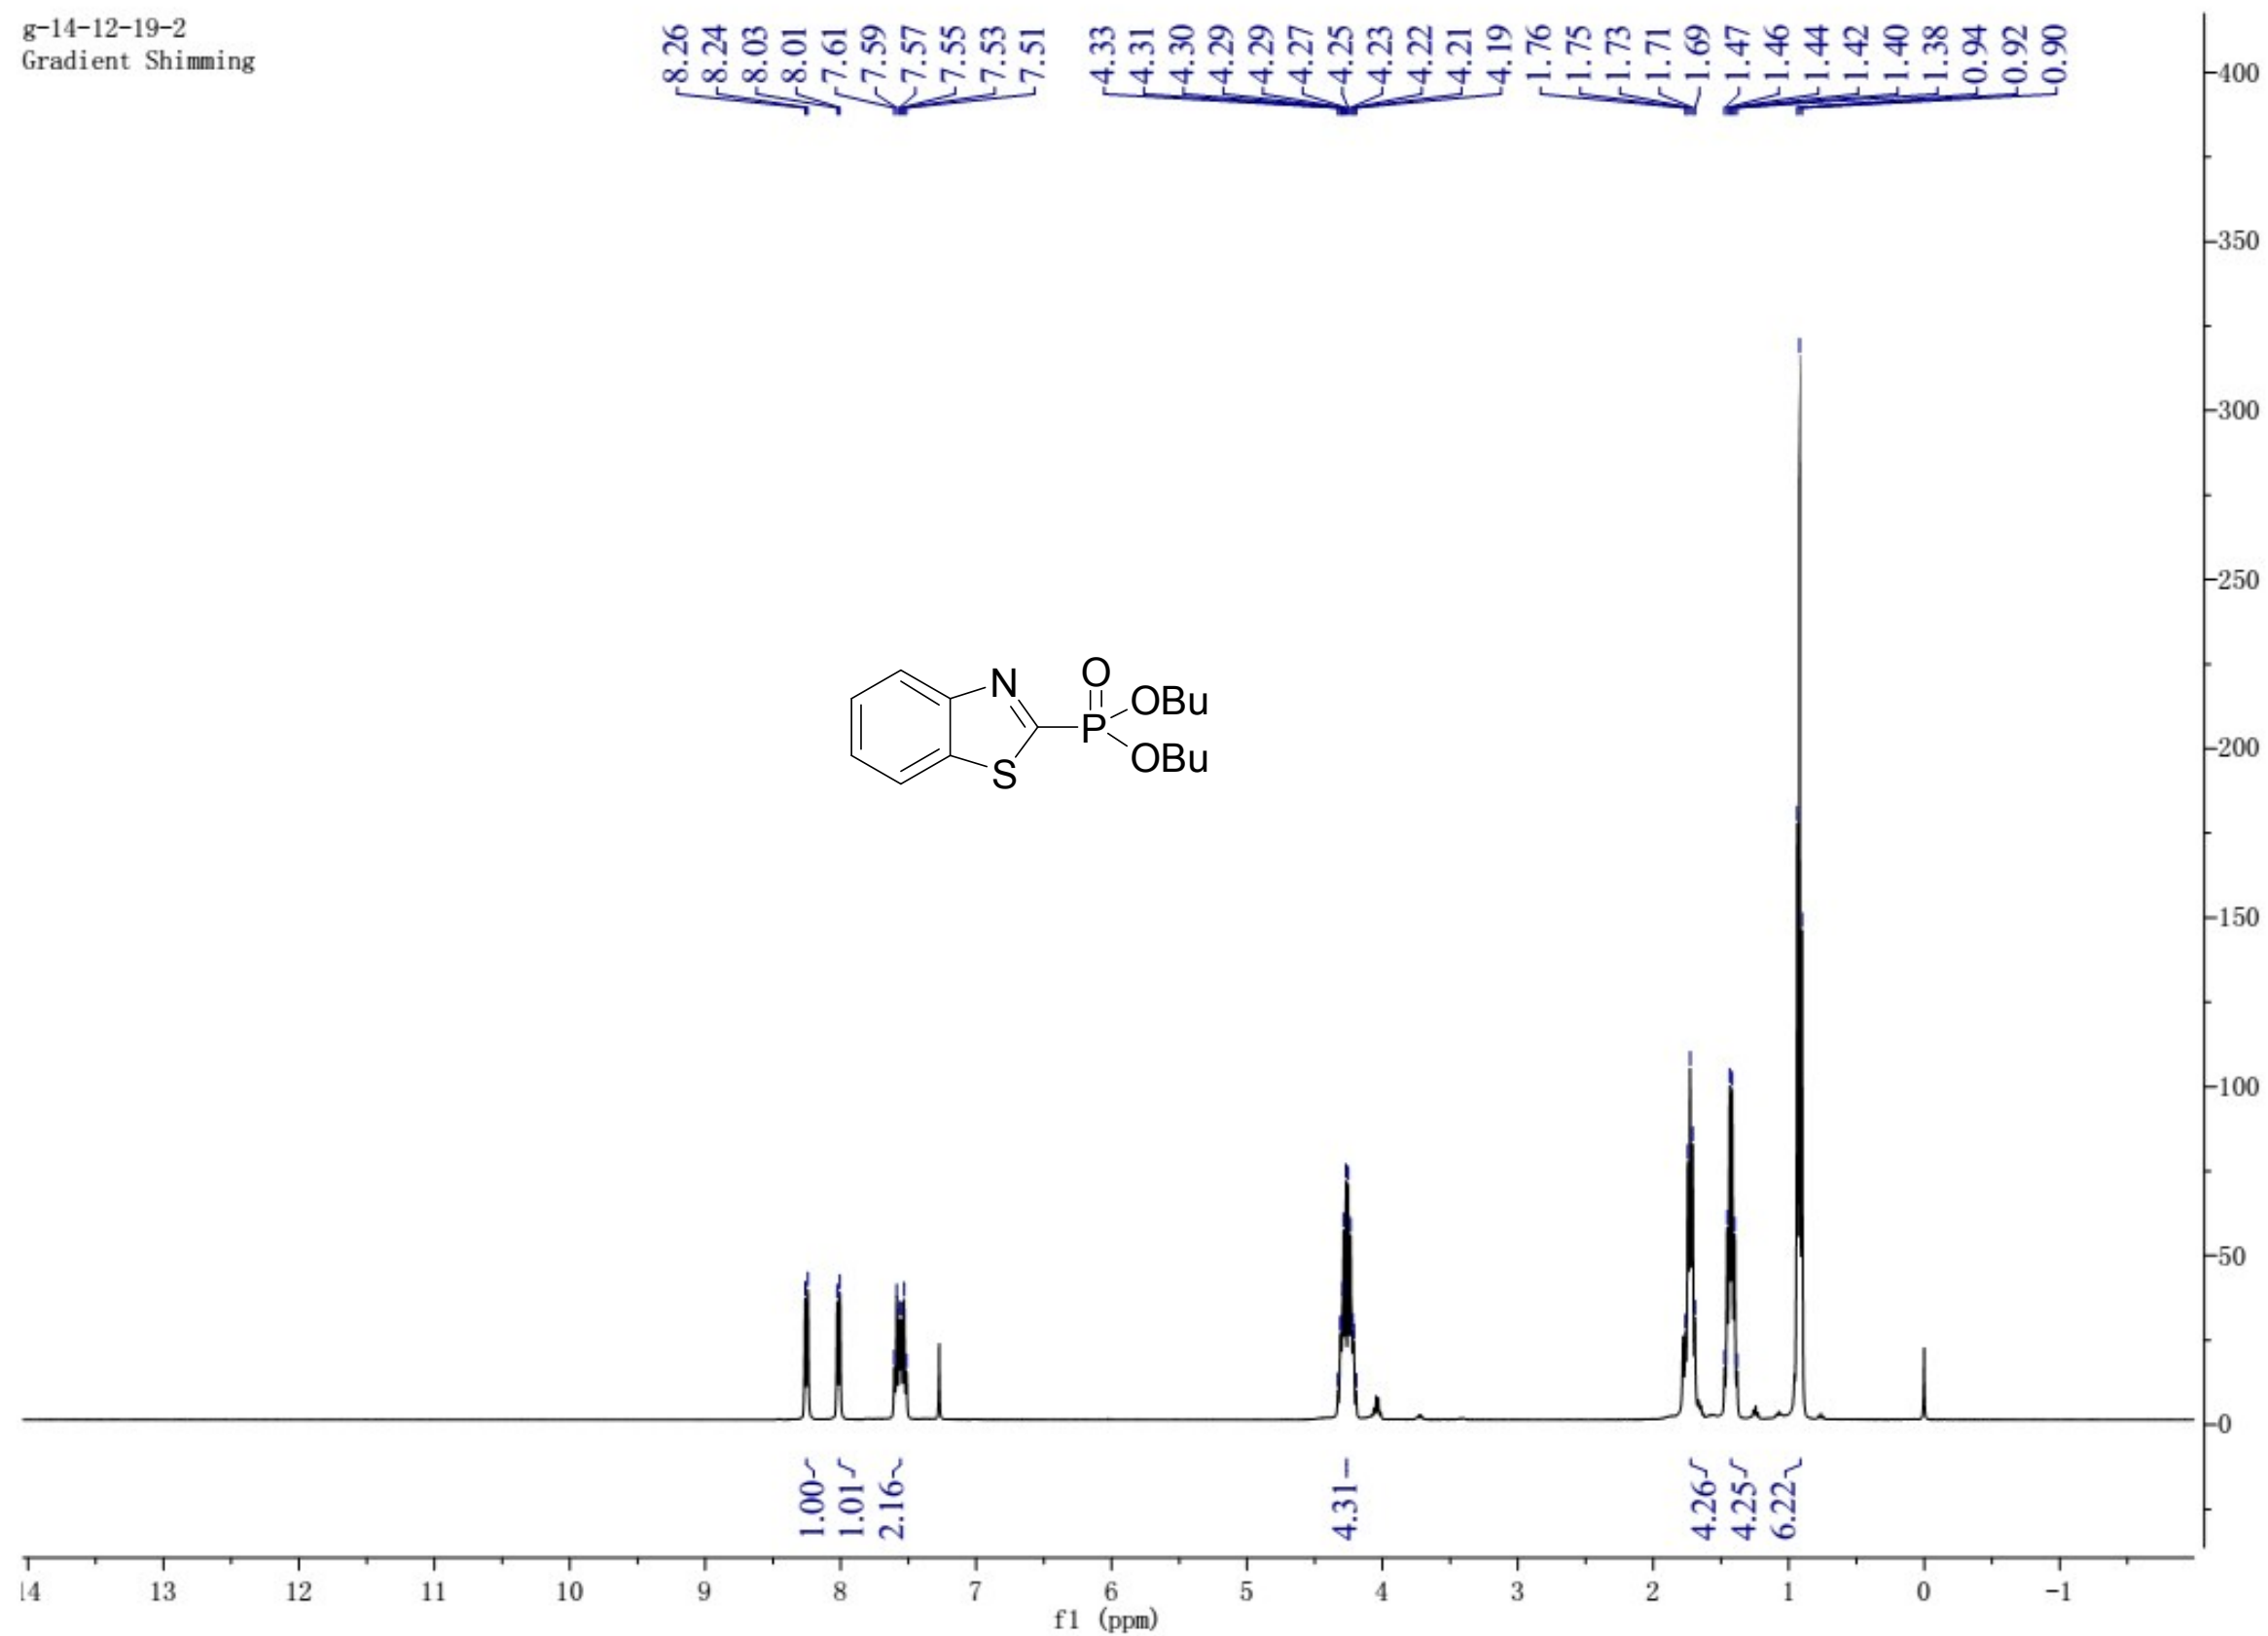

Y150059  
sample8 13C

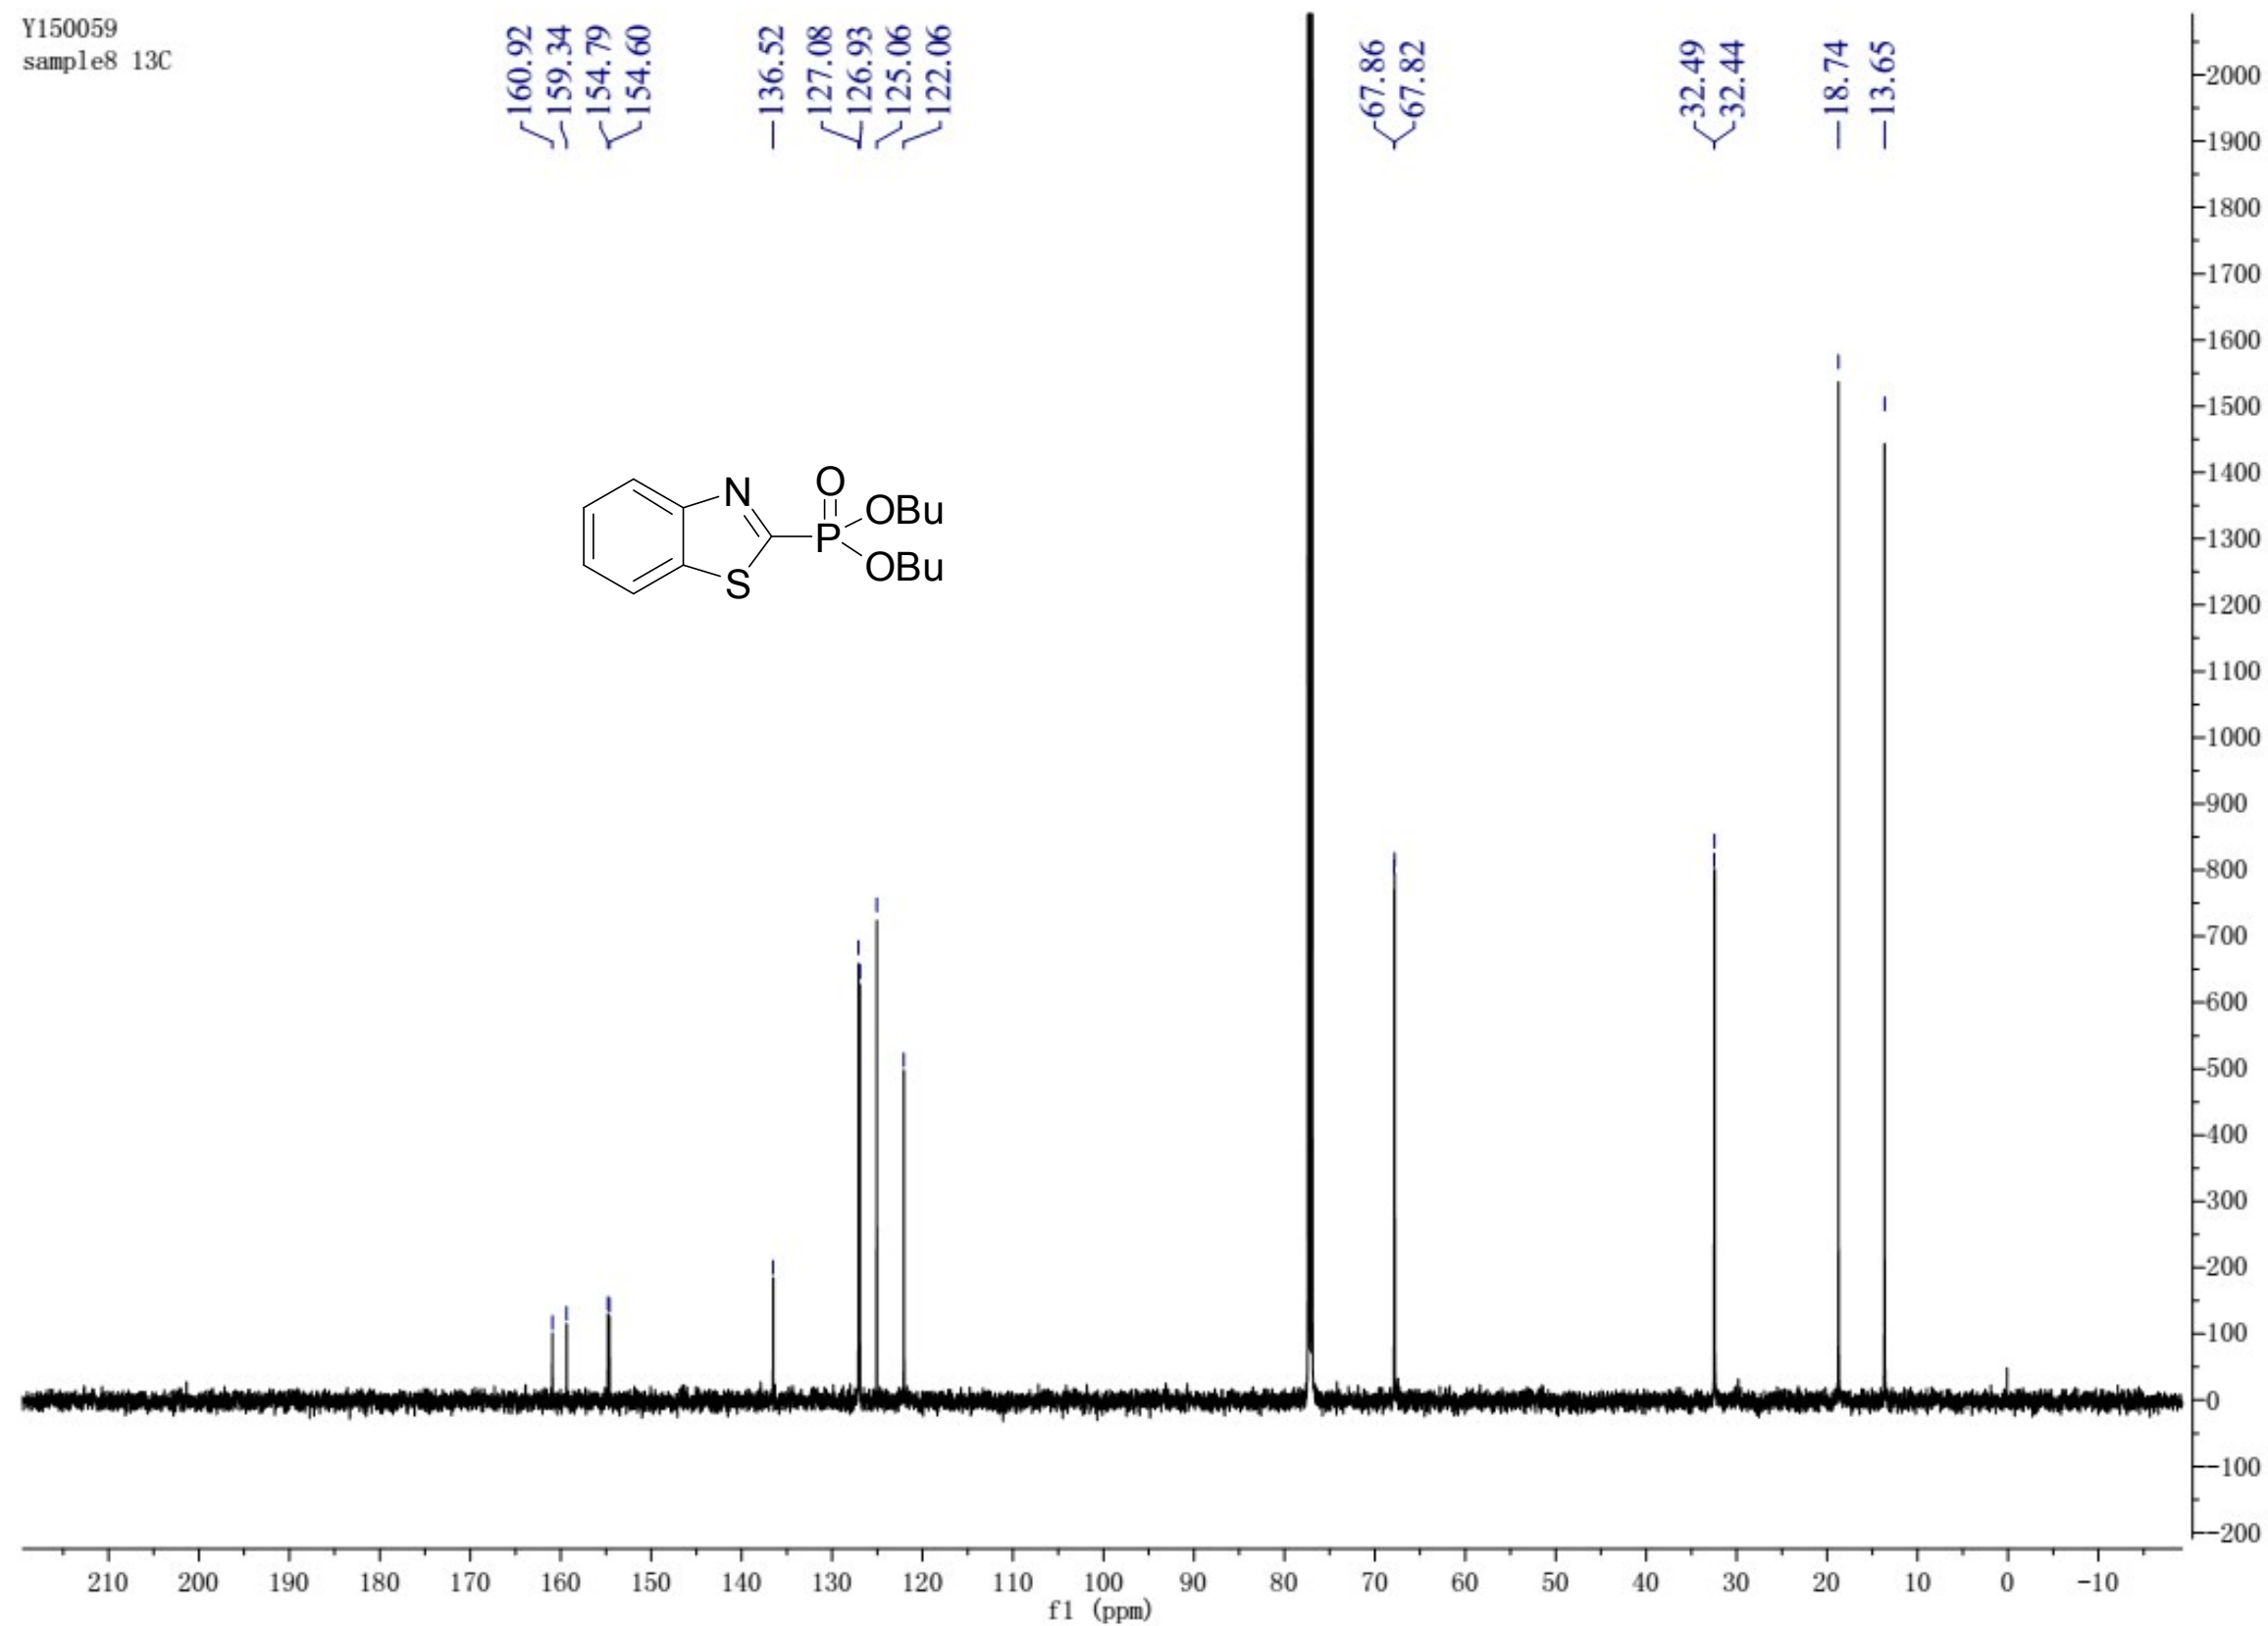

yr-2

-4.19

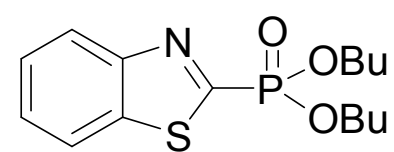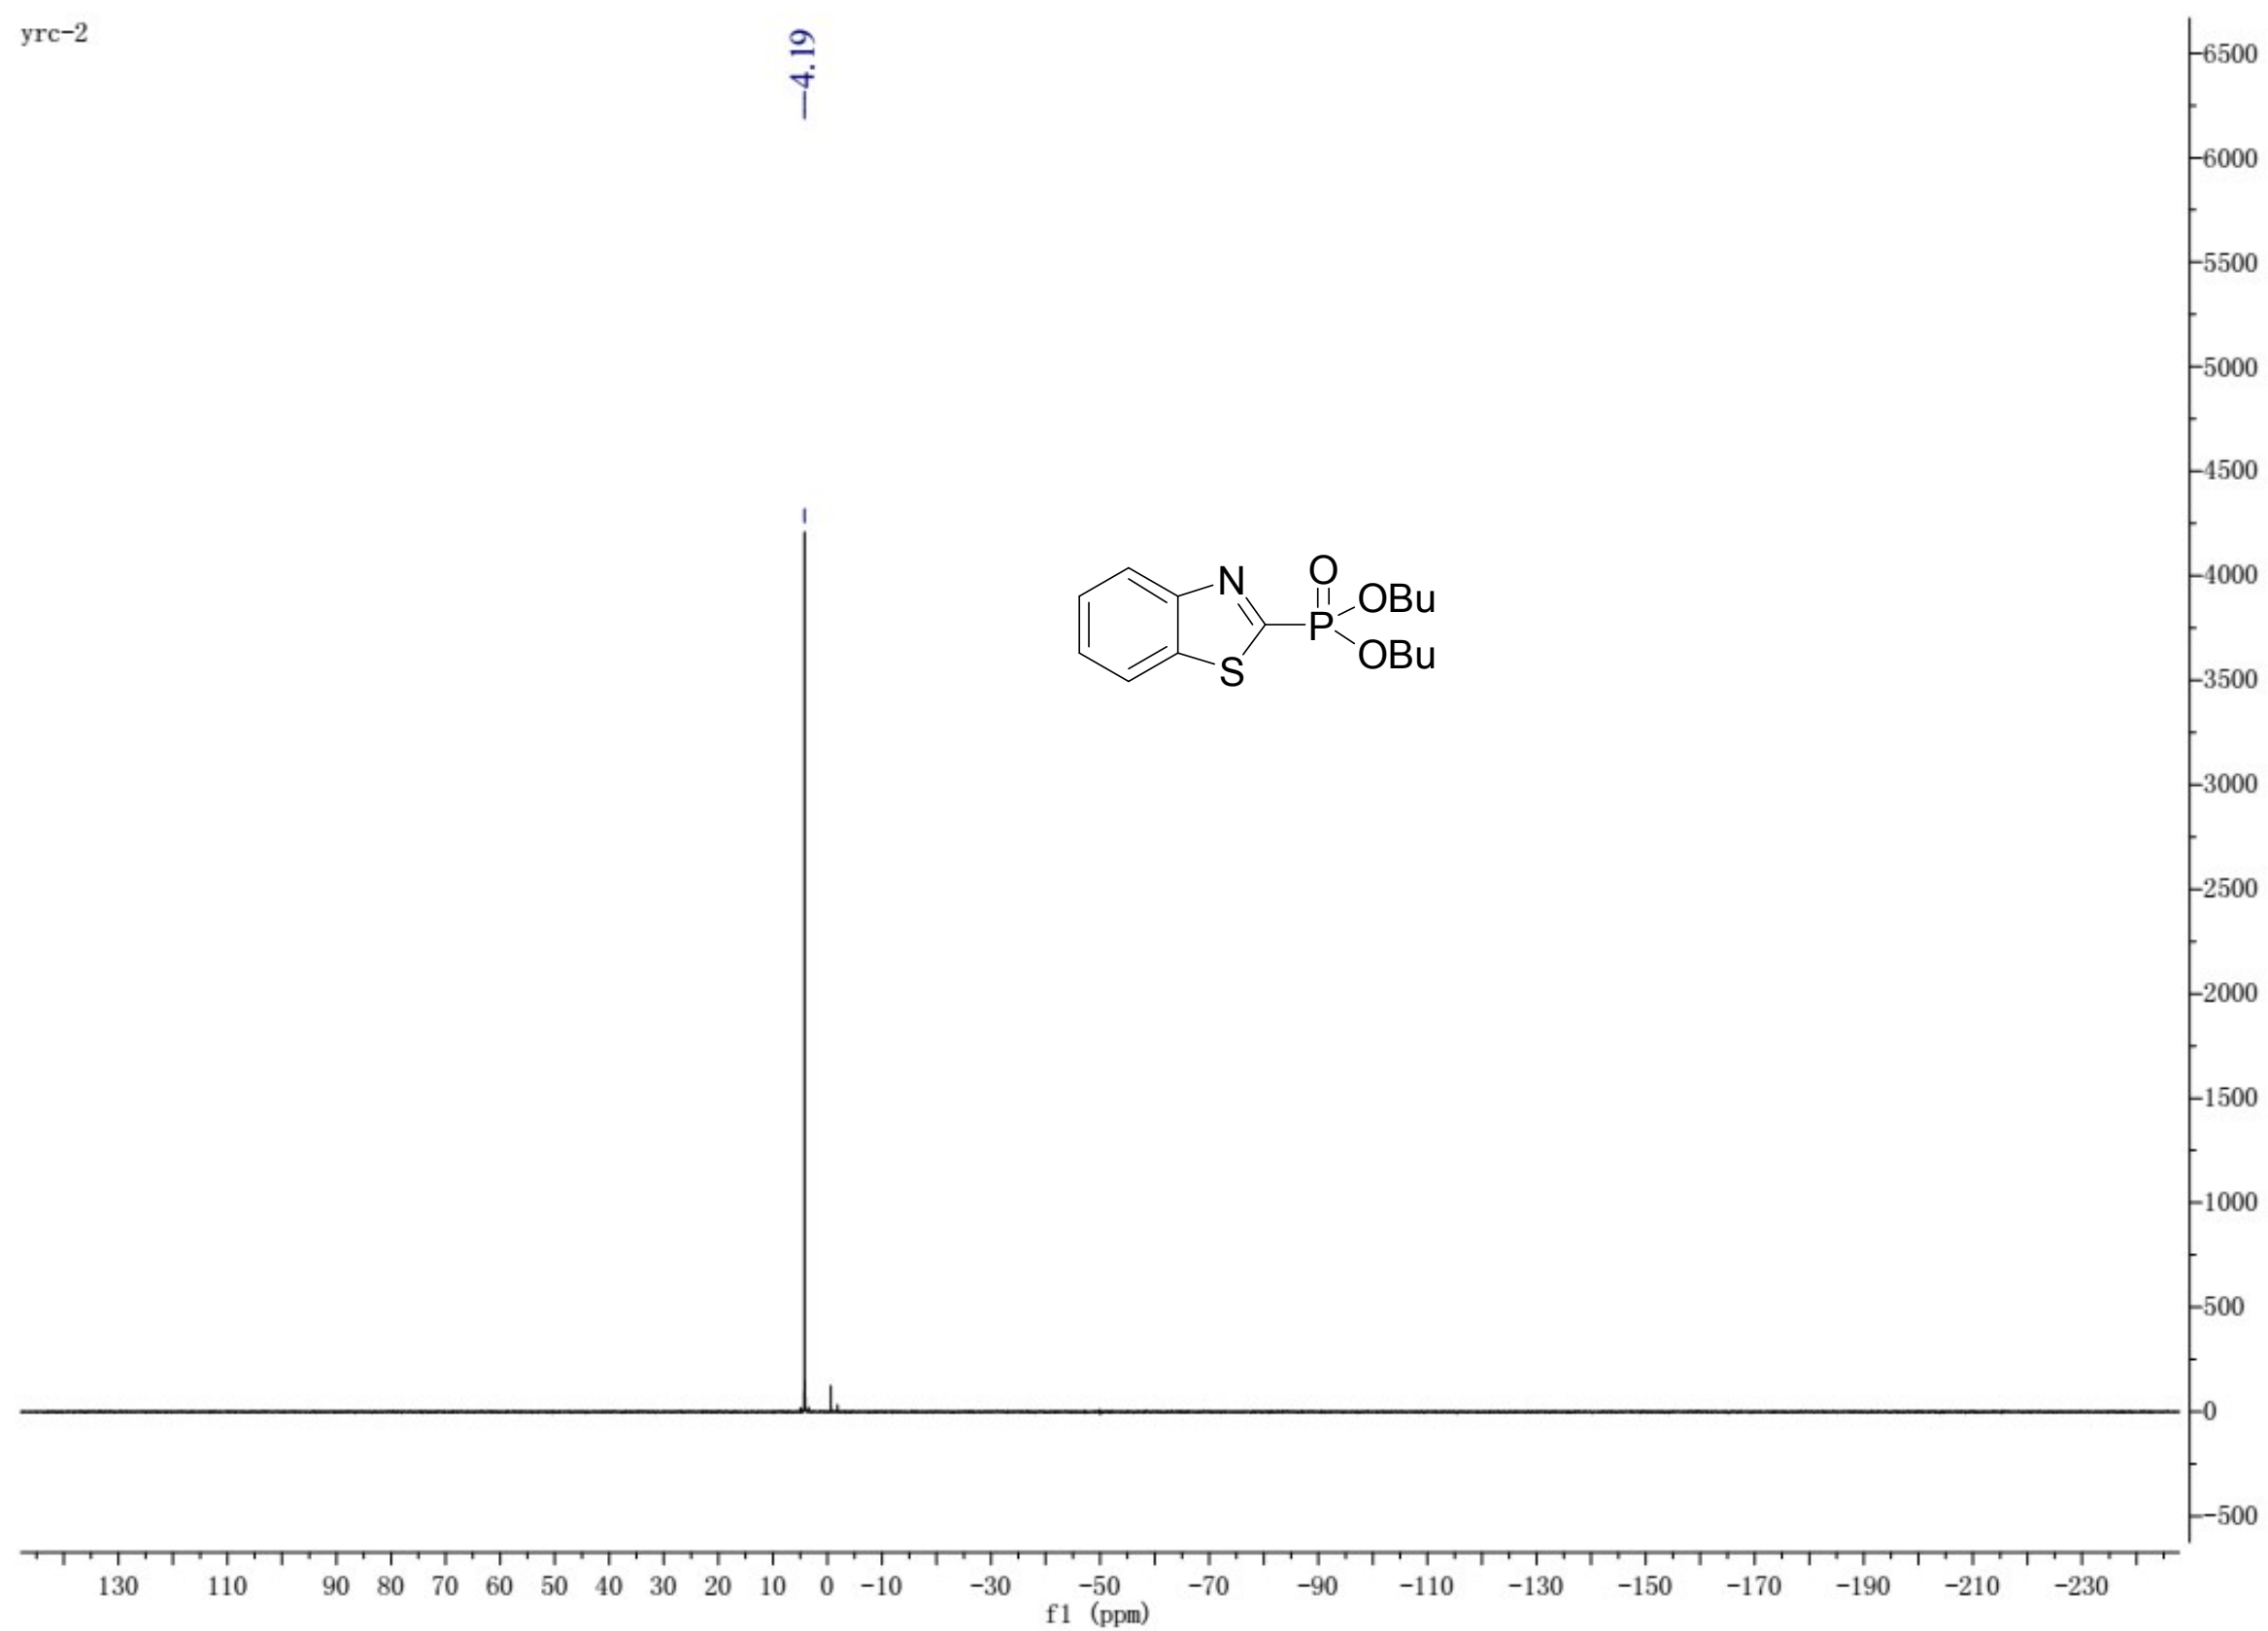

2  
Gradient Shimming

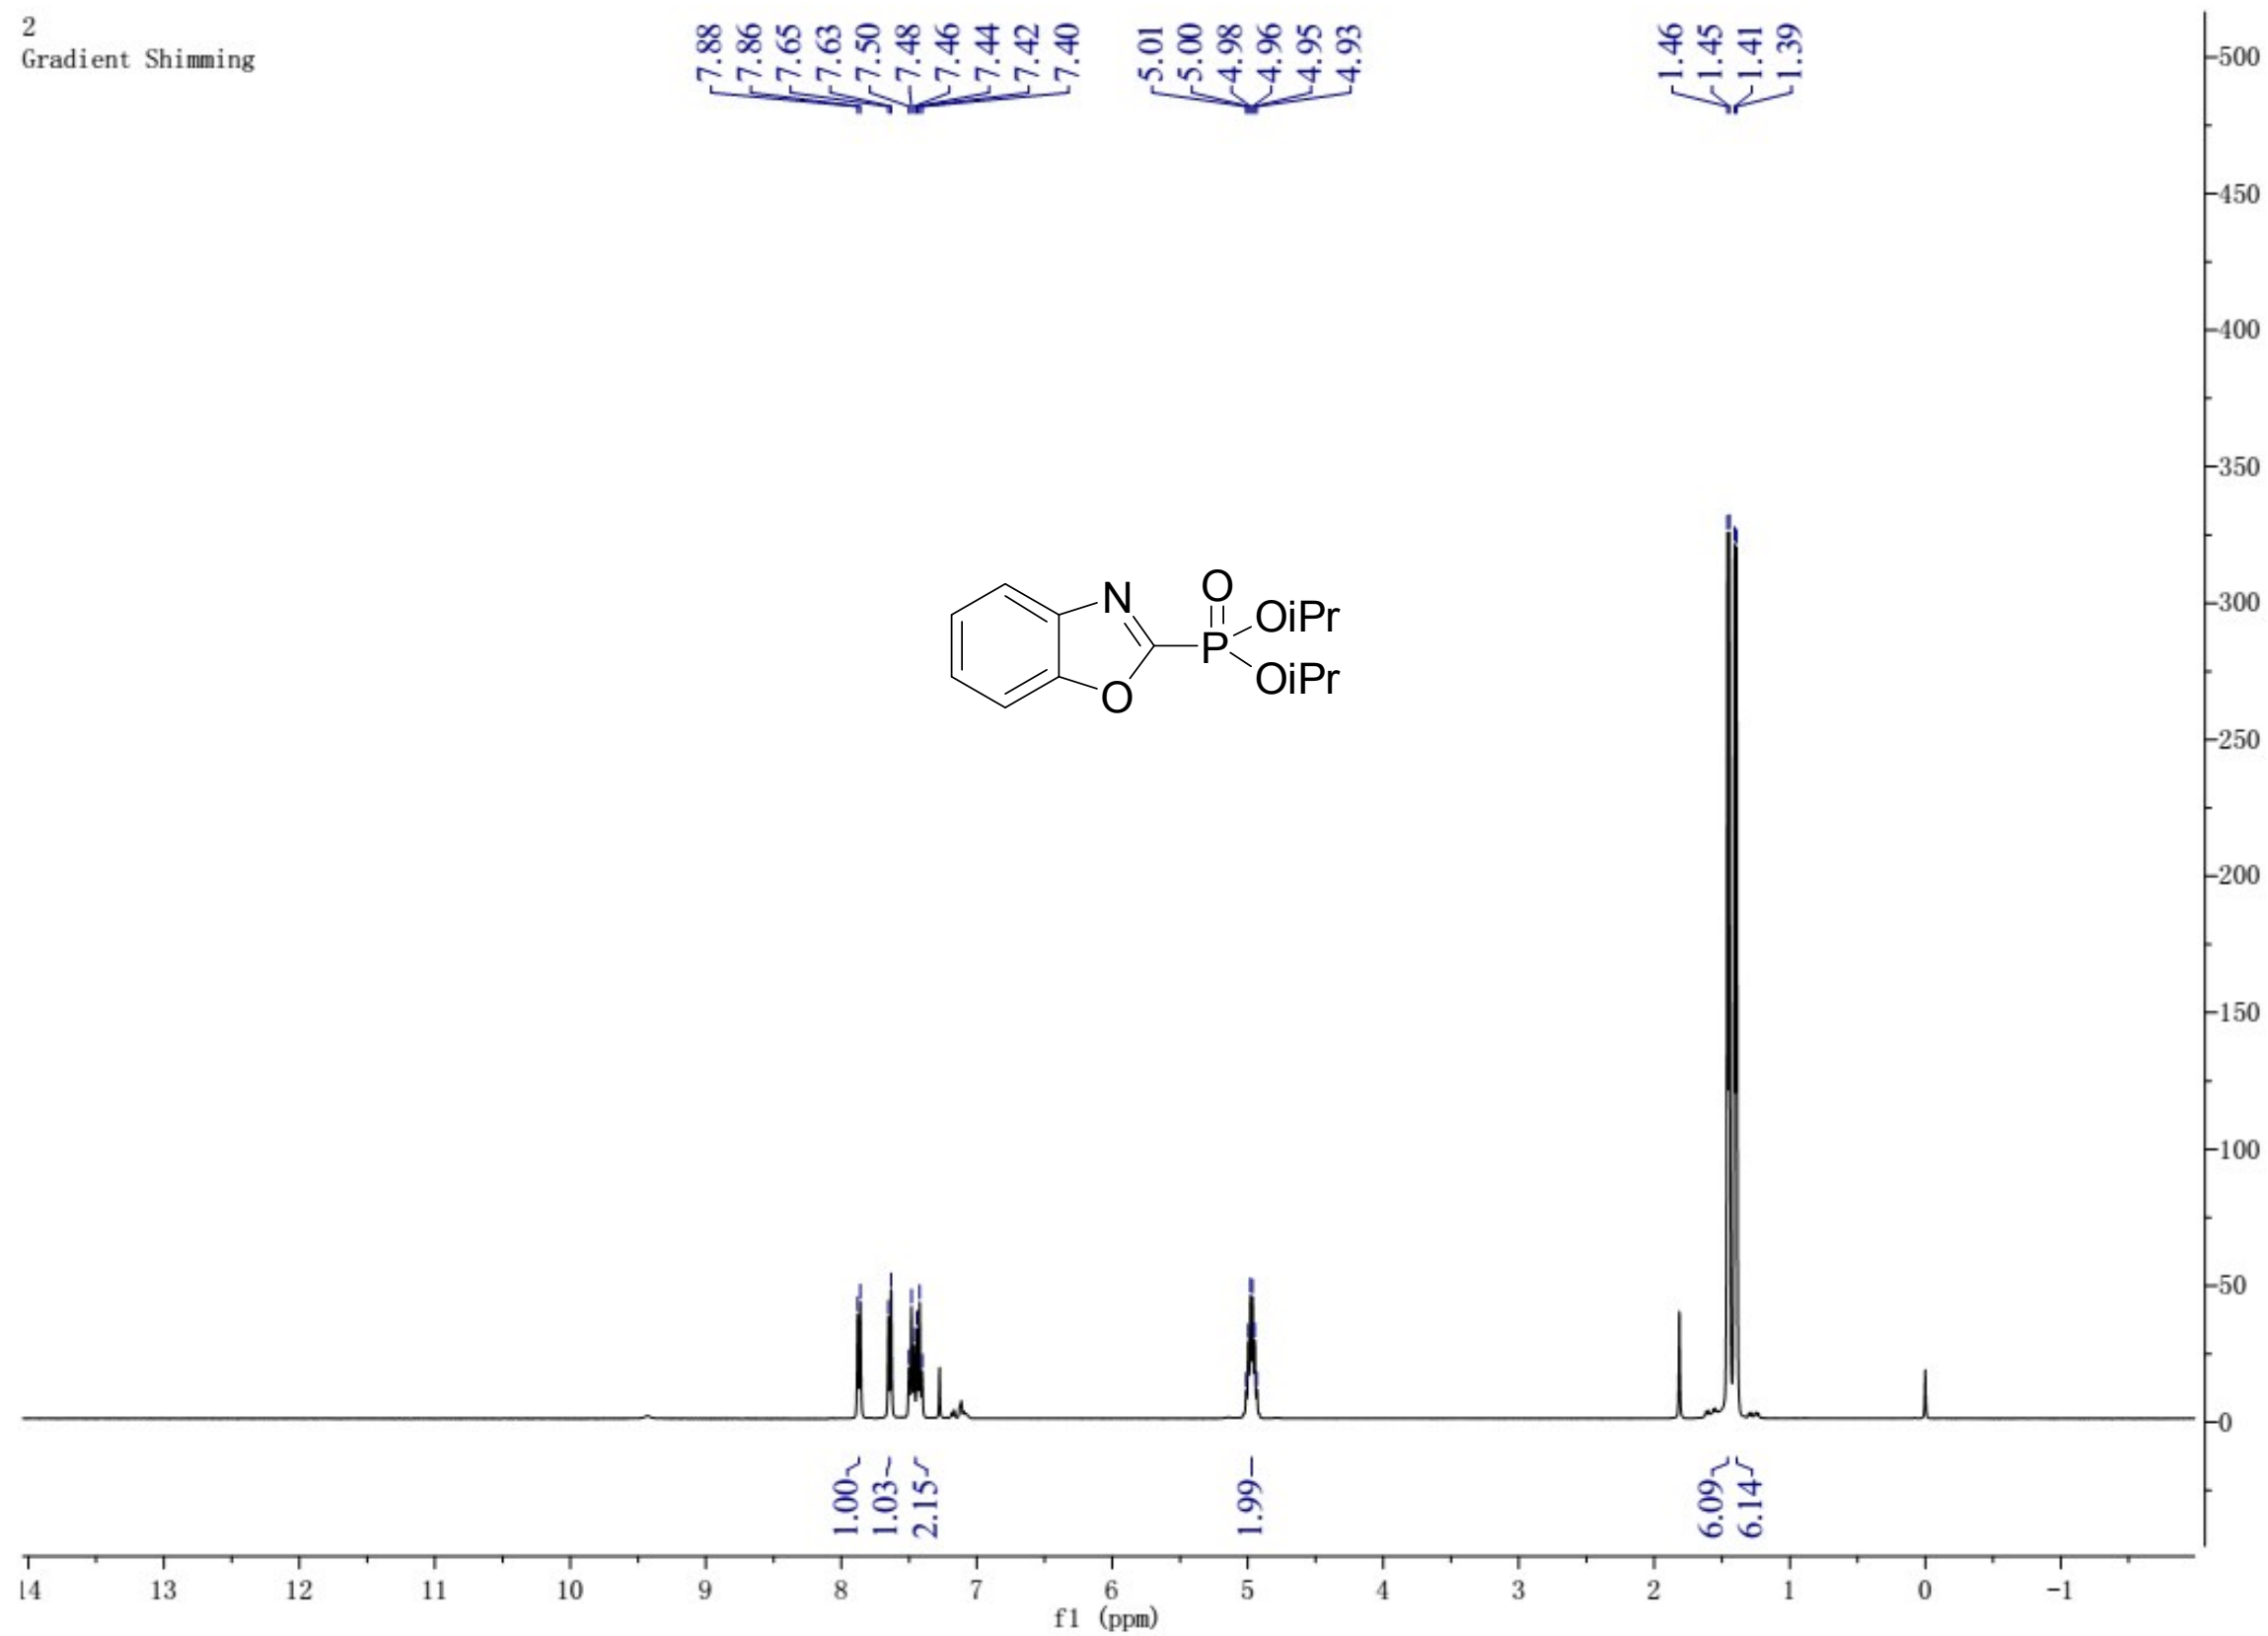

g-14-12-31-5  
STANDARD CARBON PARAMETERS

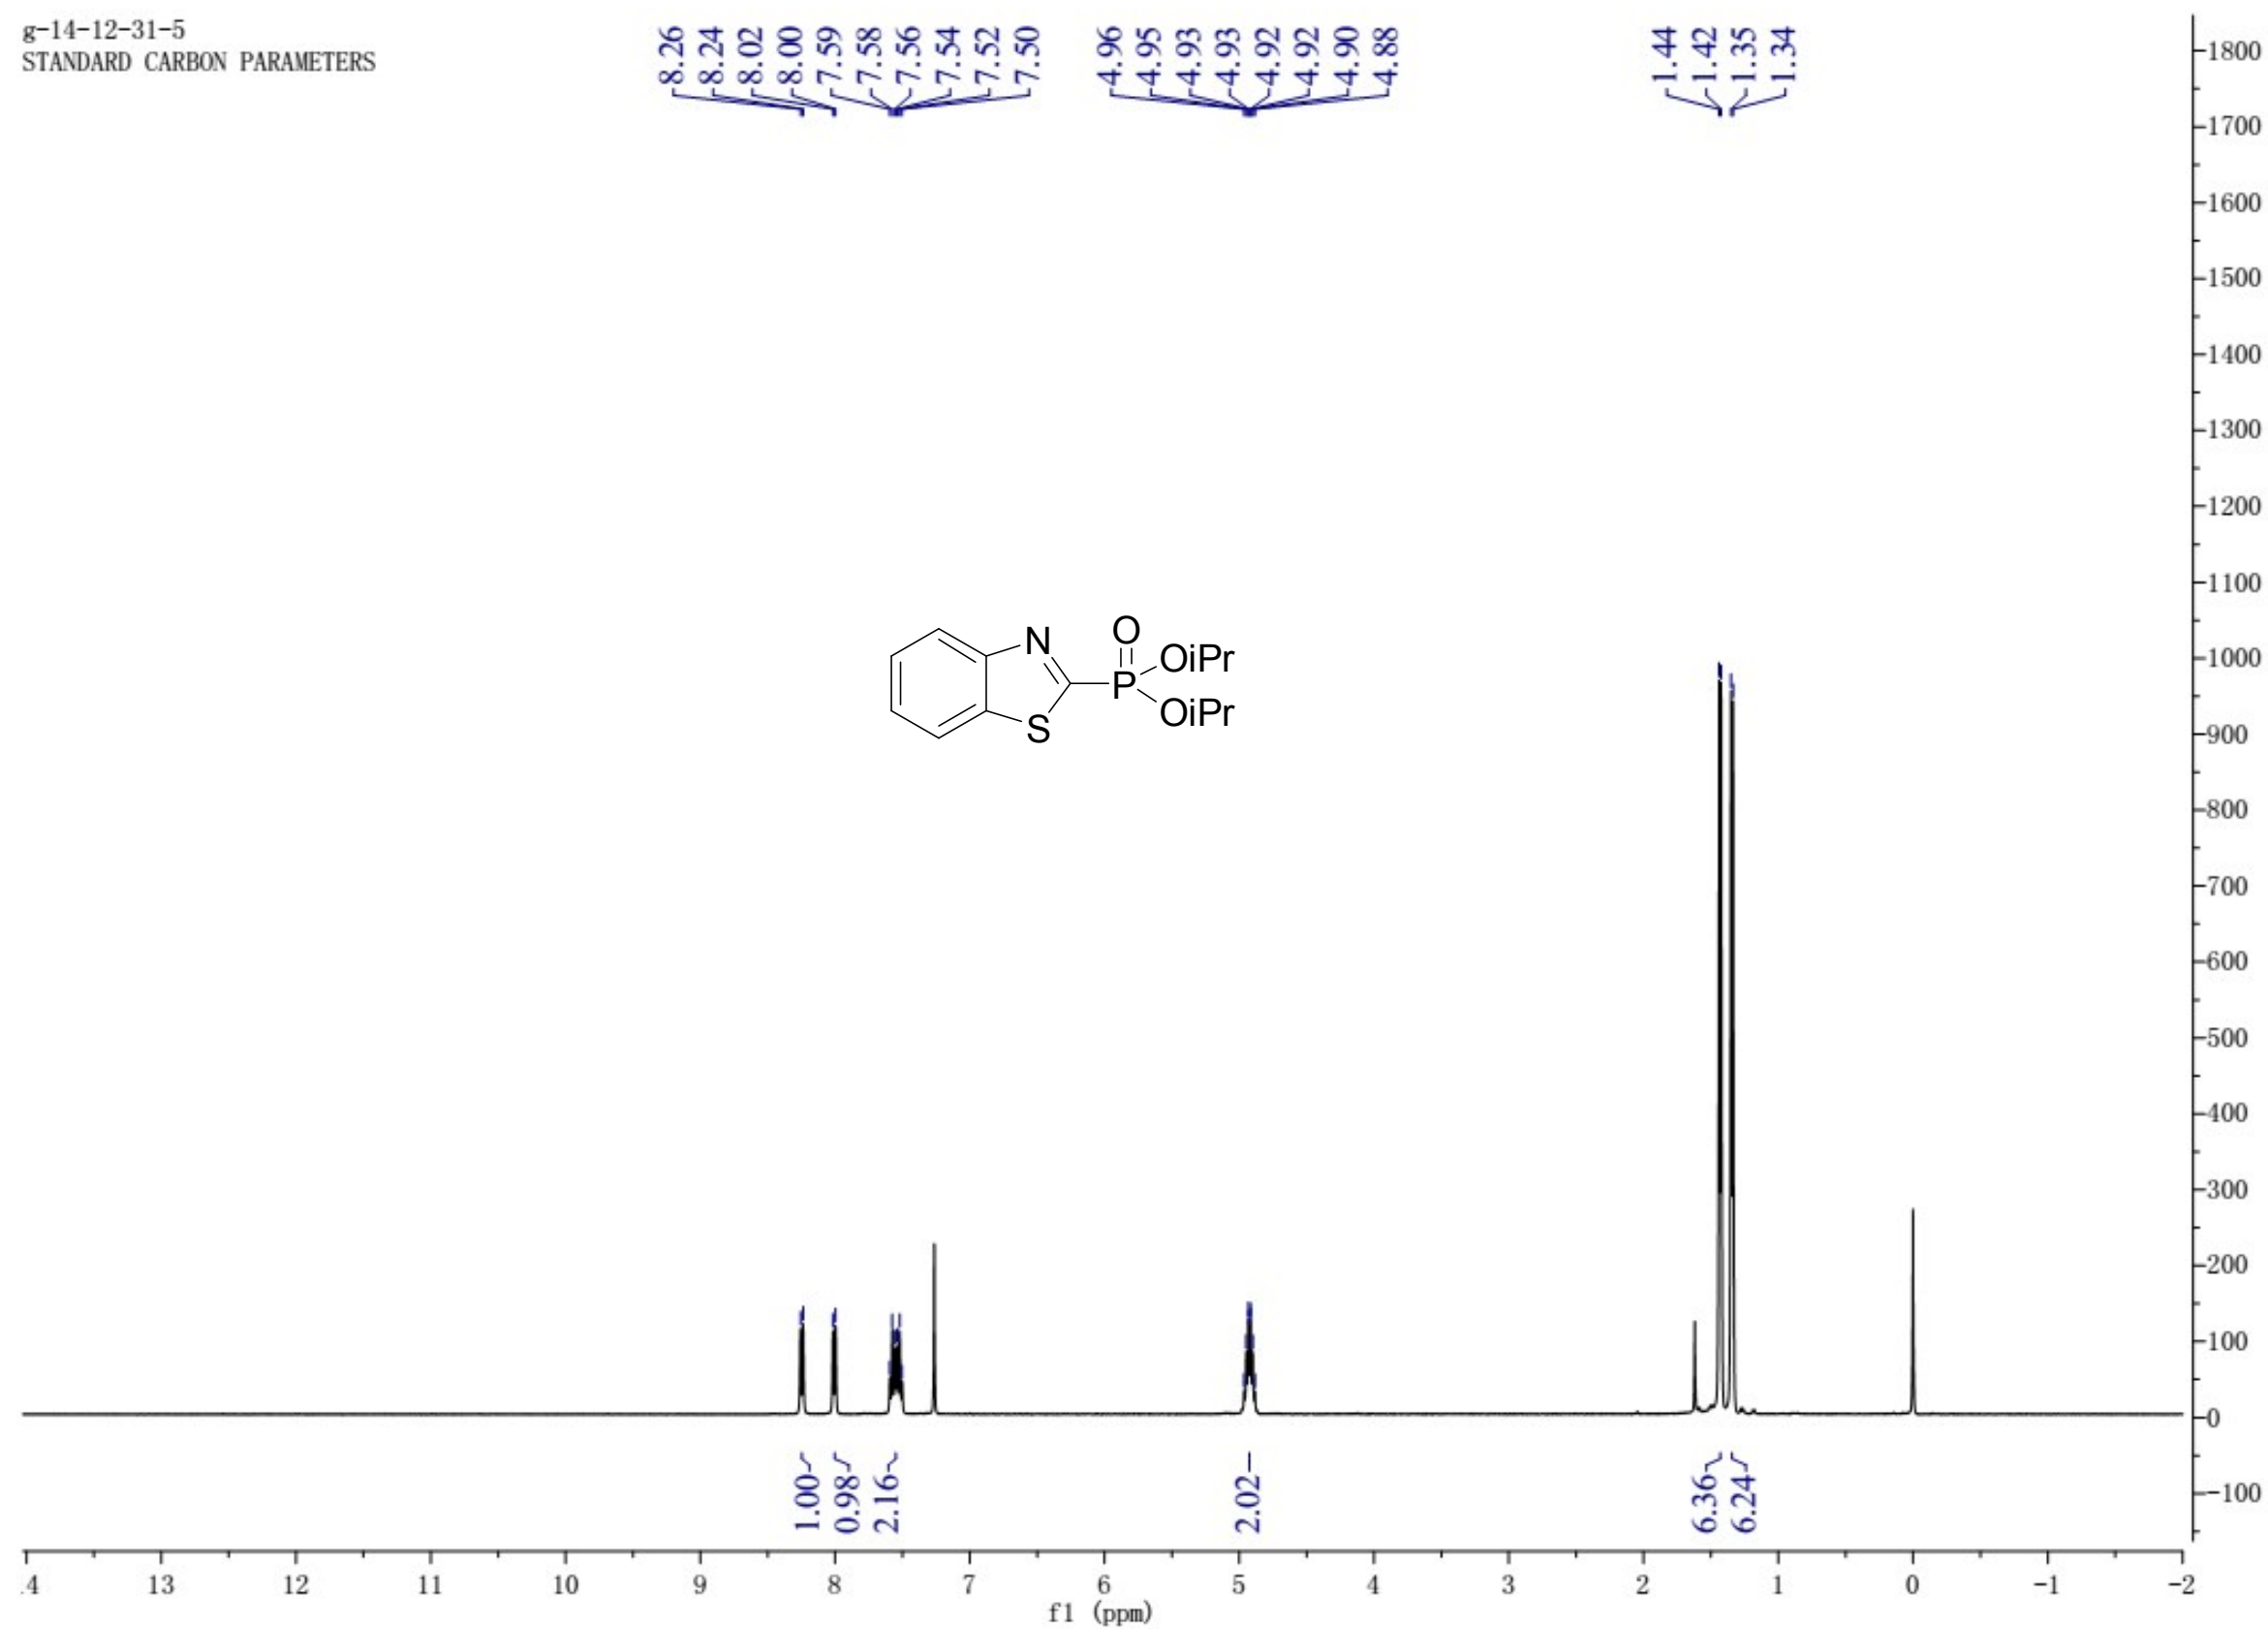

2015-4-17-1

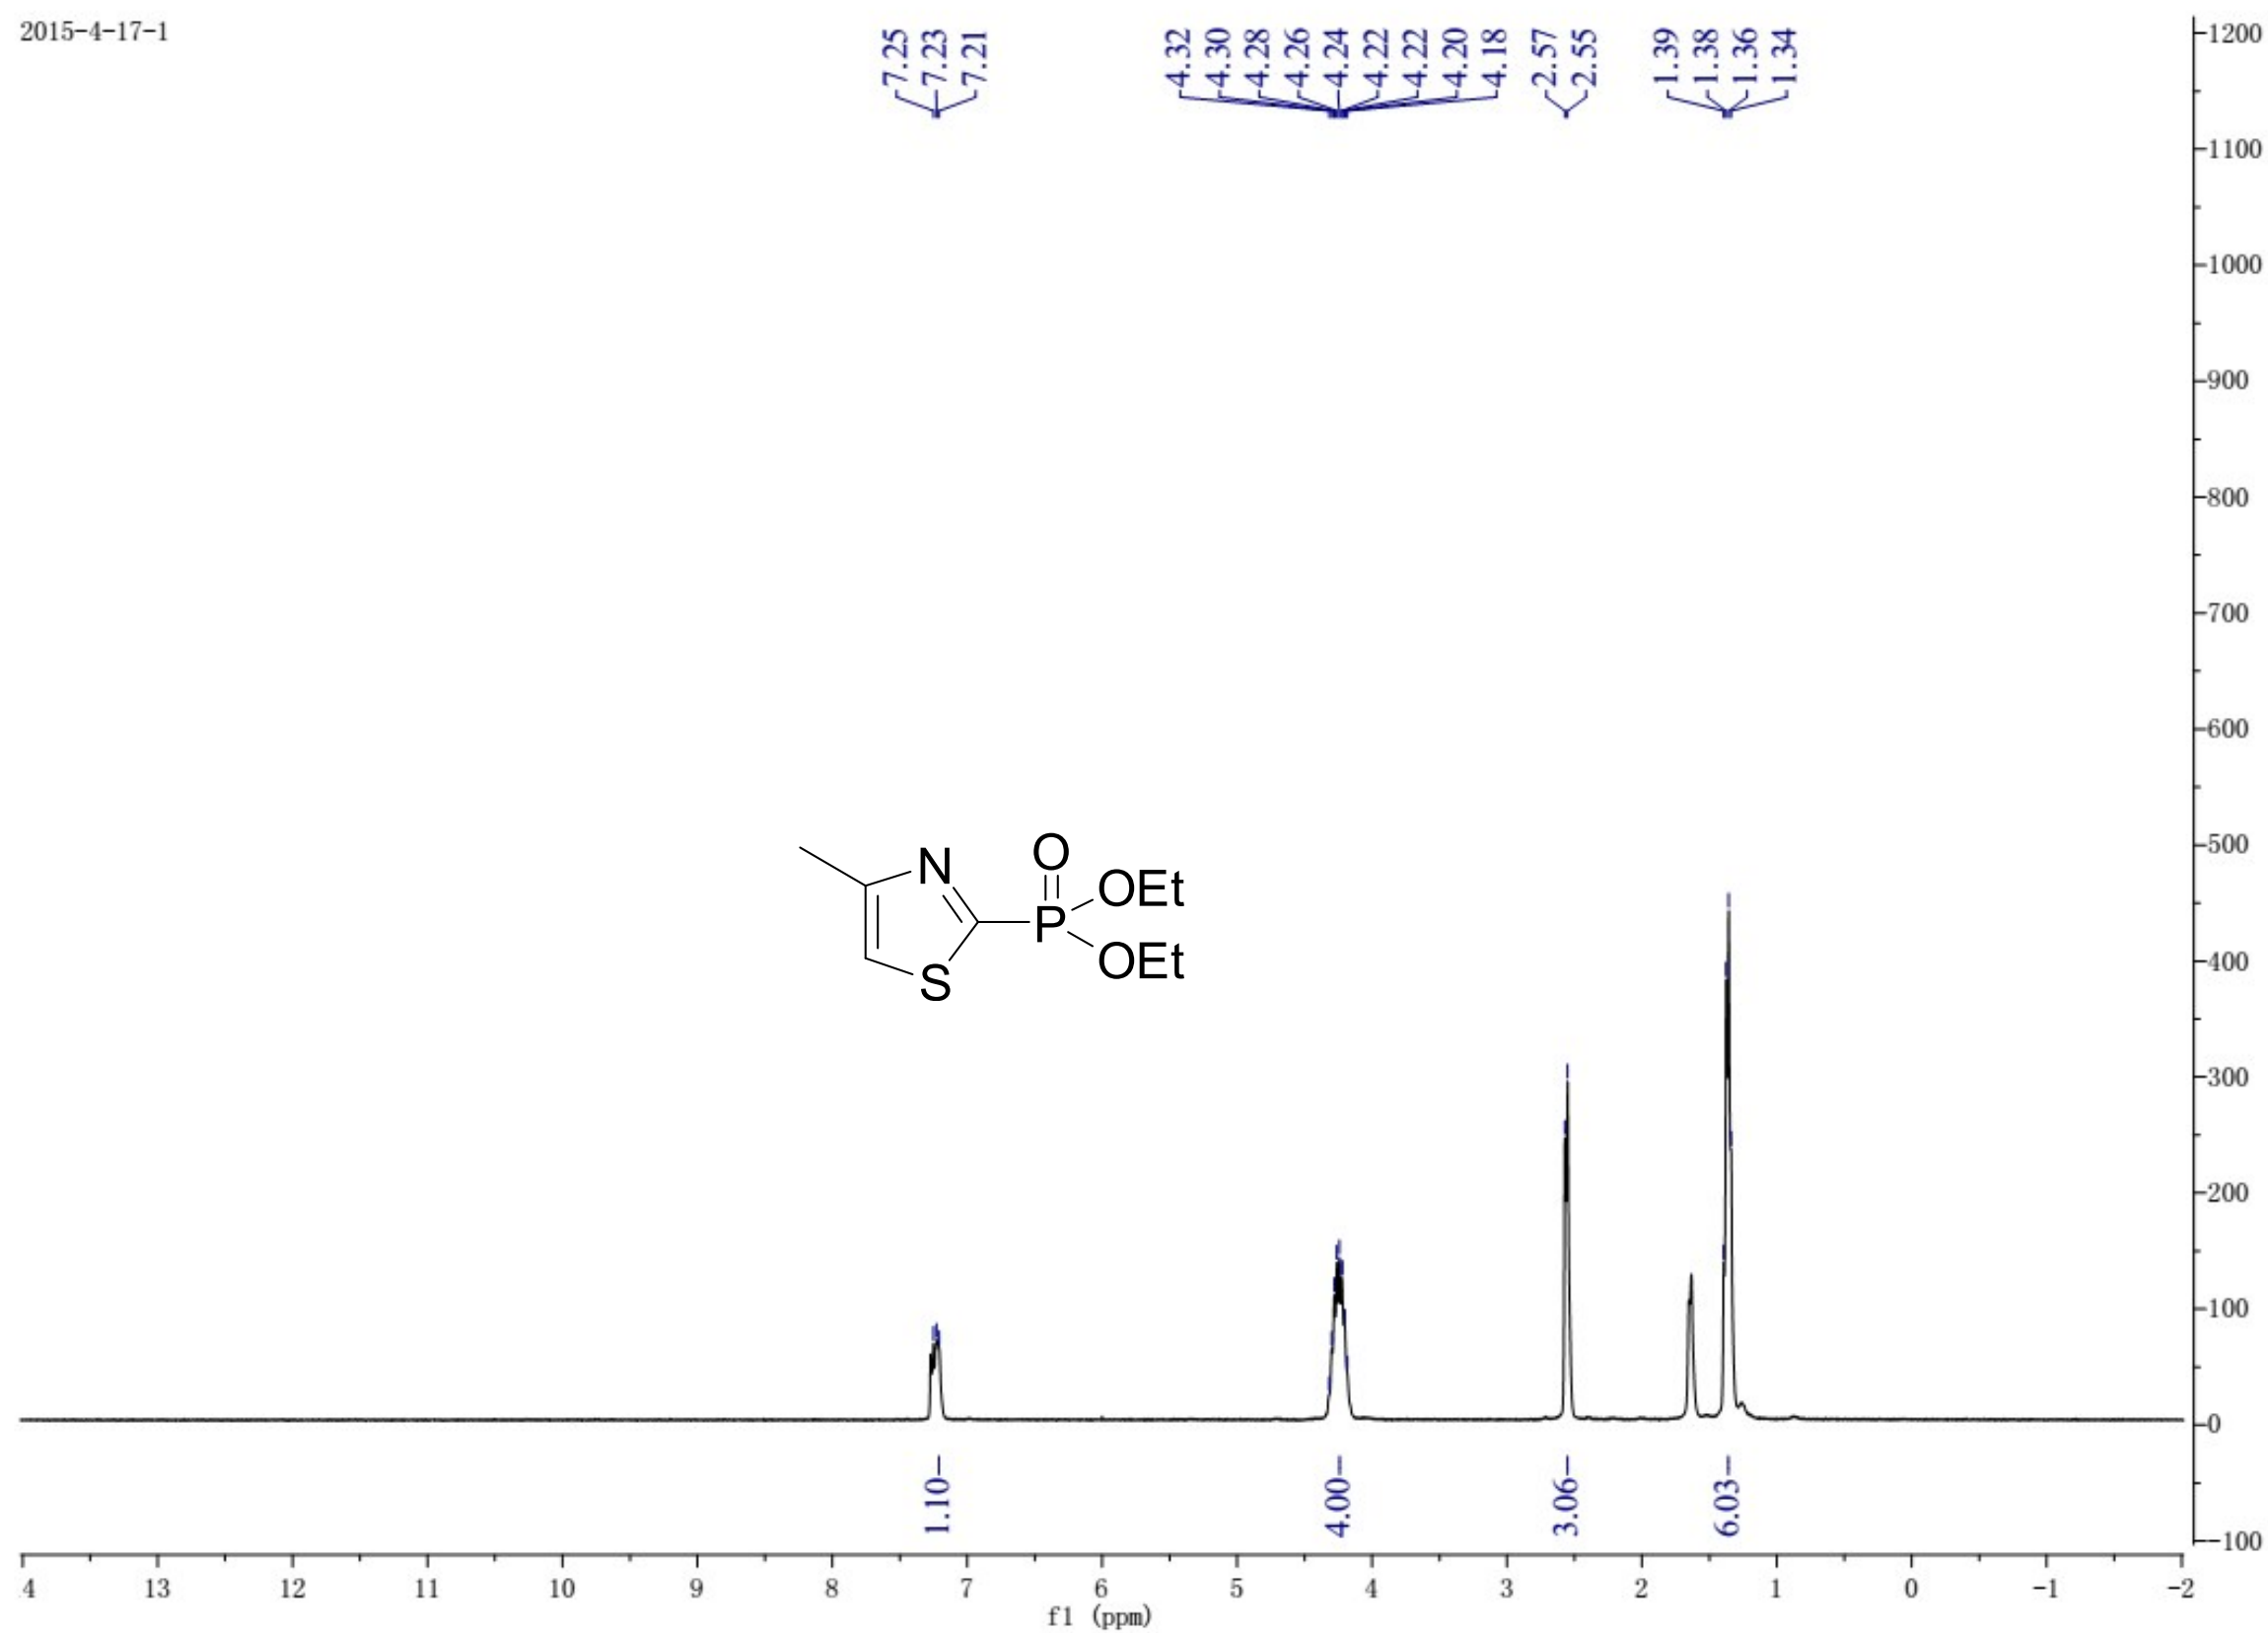

g-15-04-27-1-C13

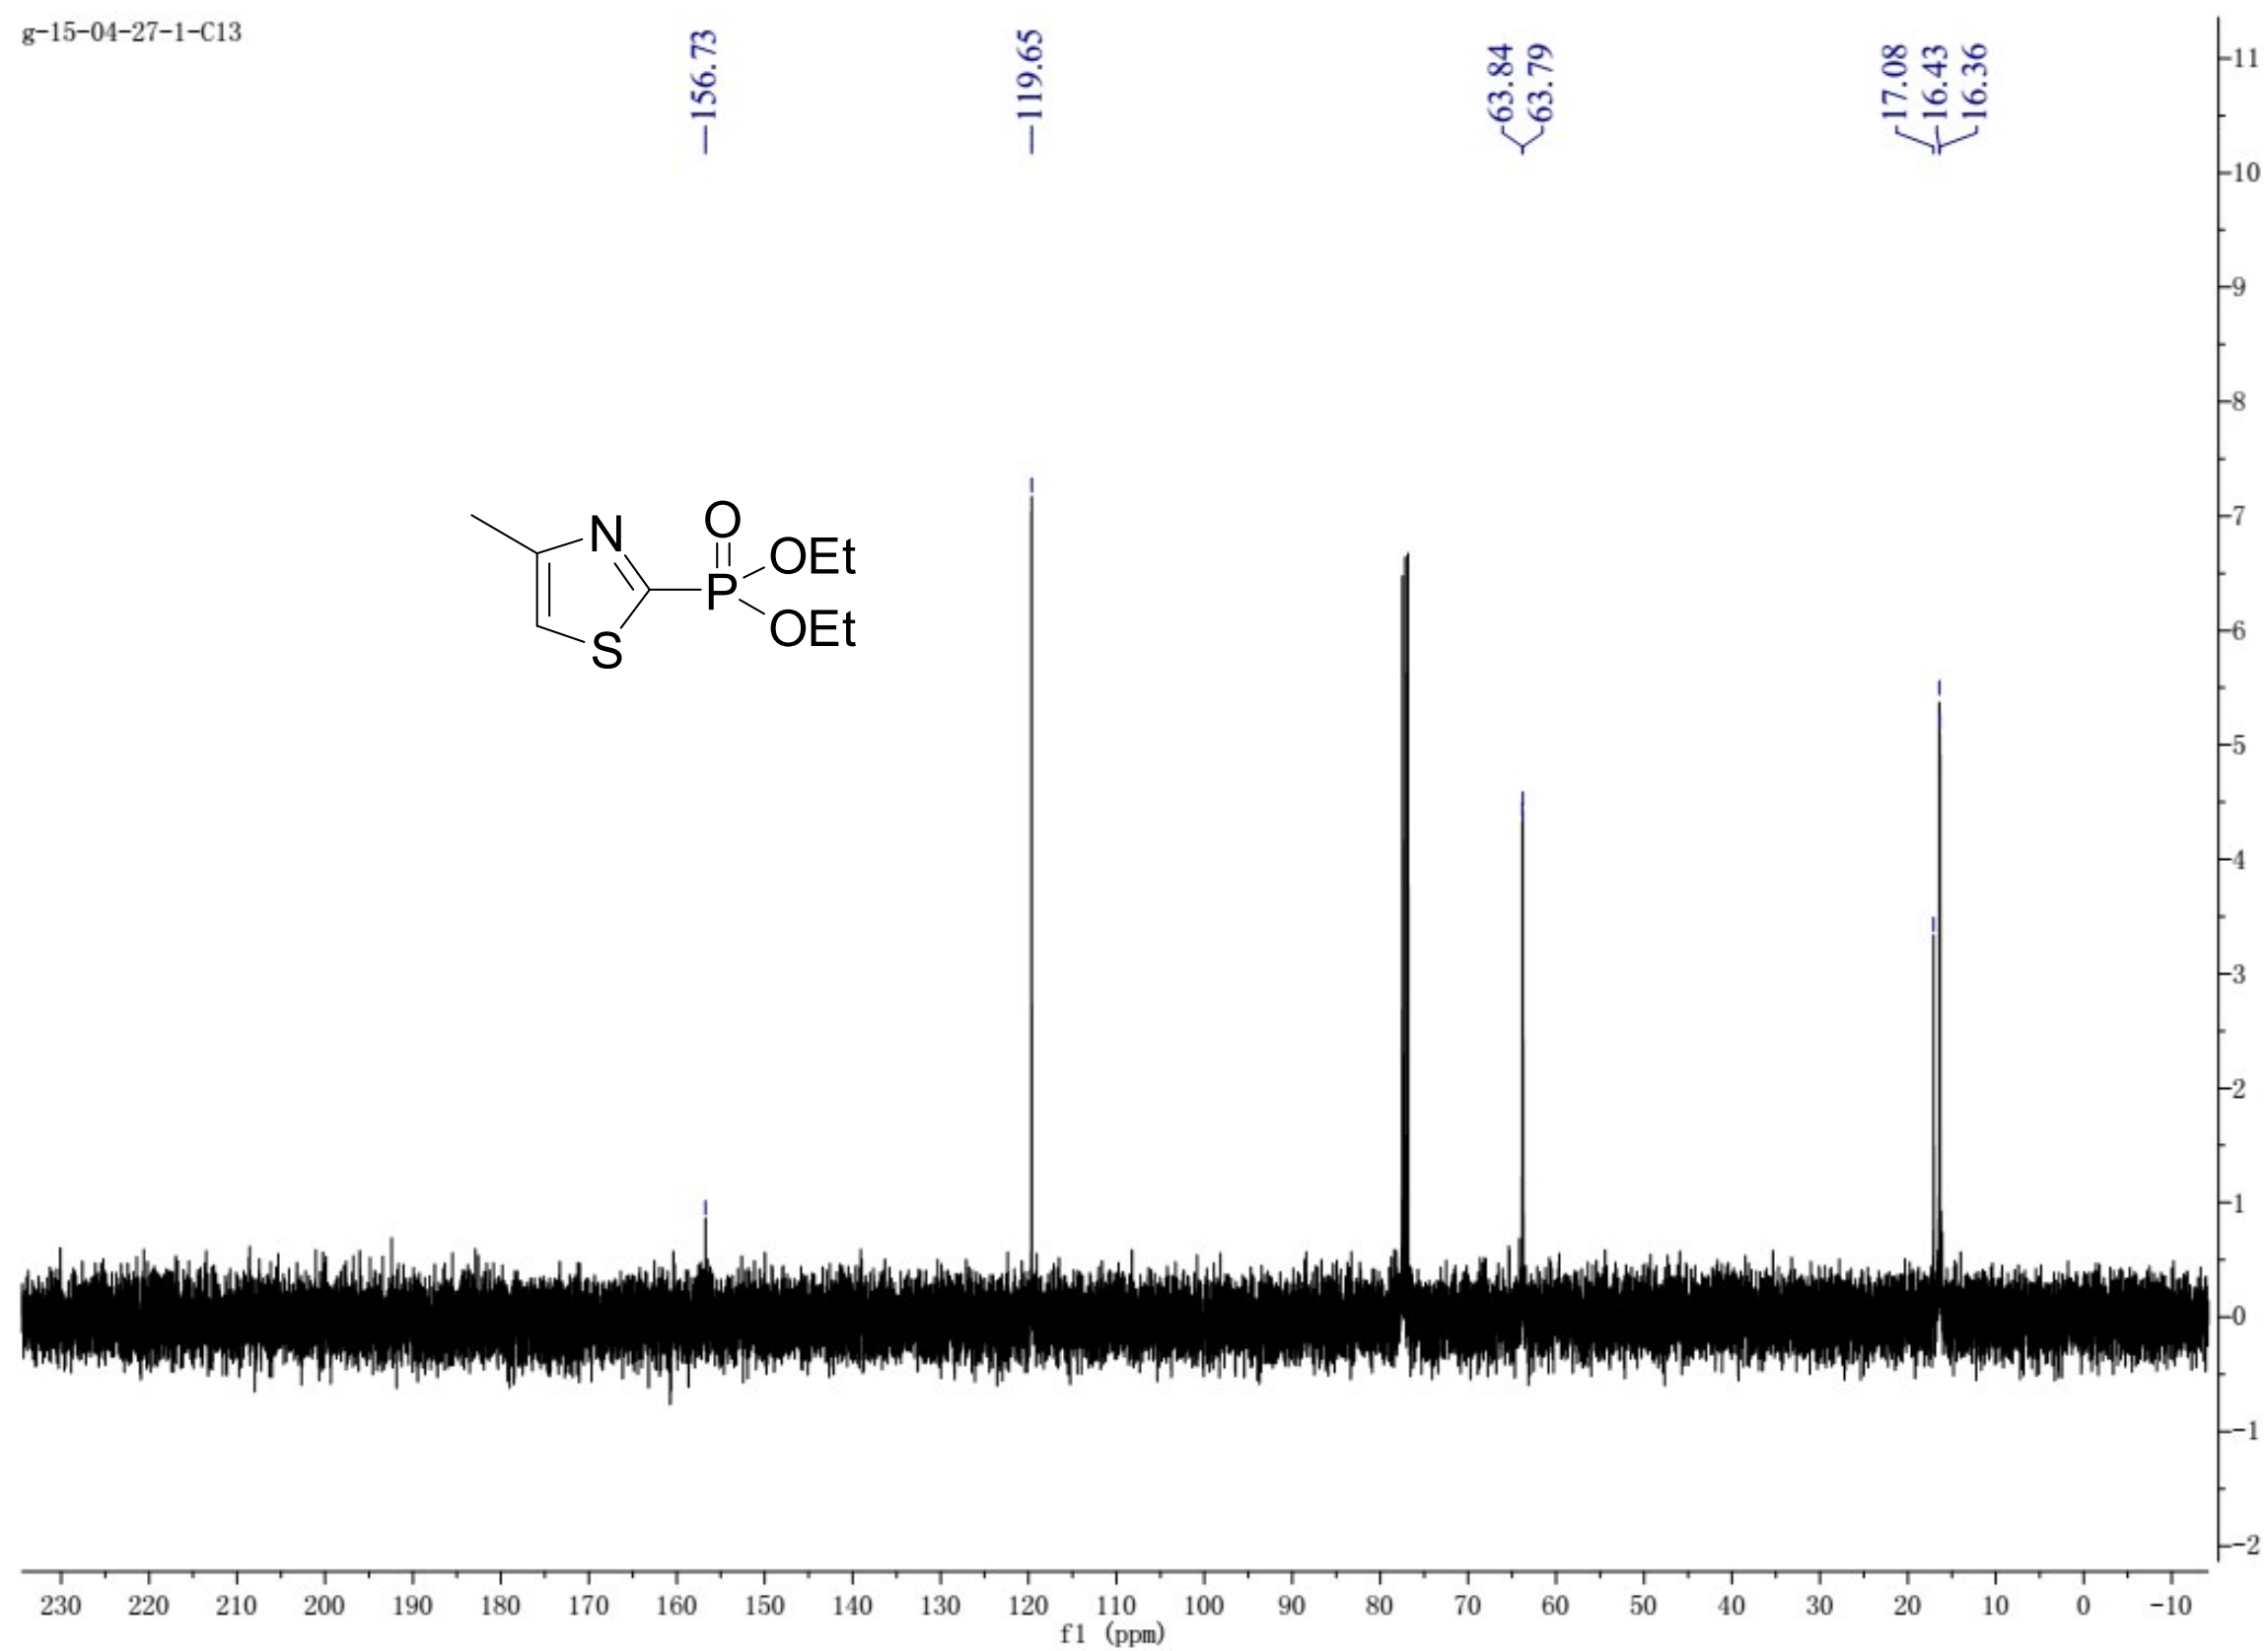

g-15-4-17-1

—4.61

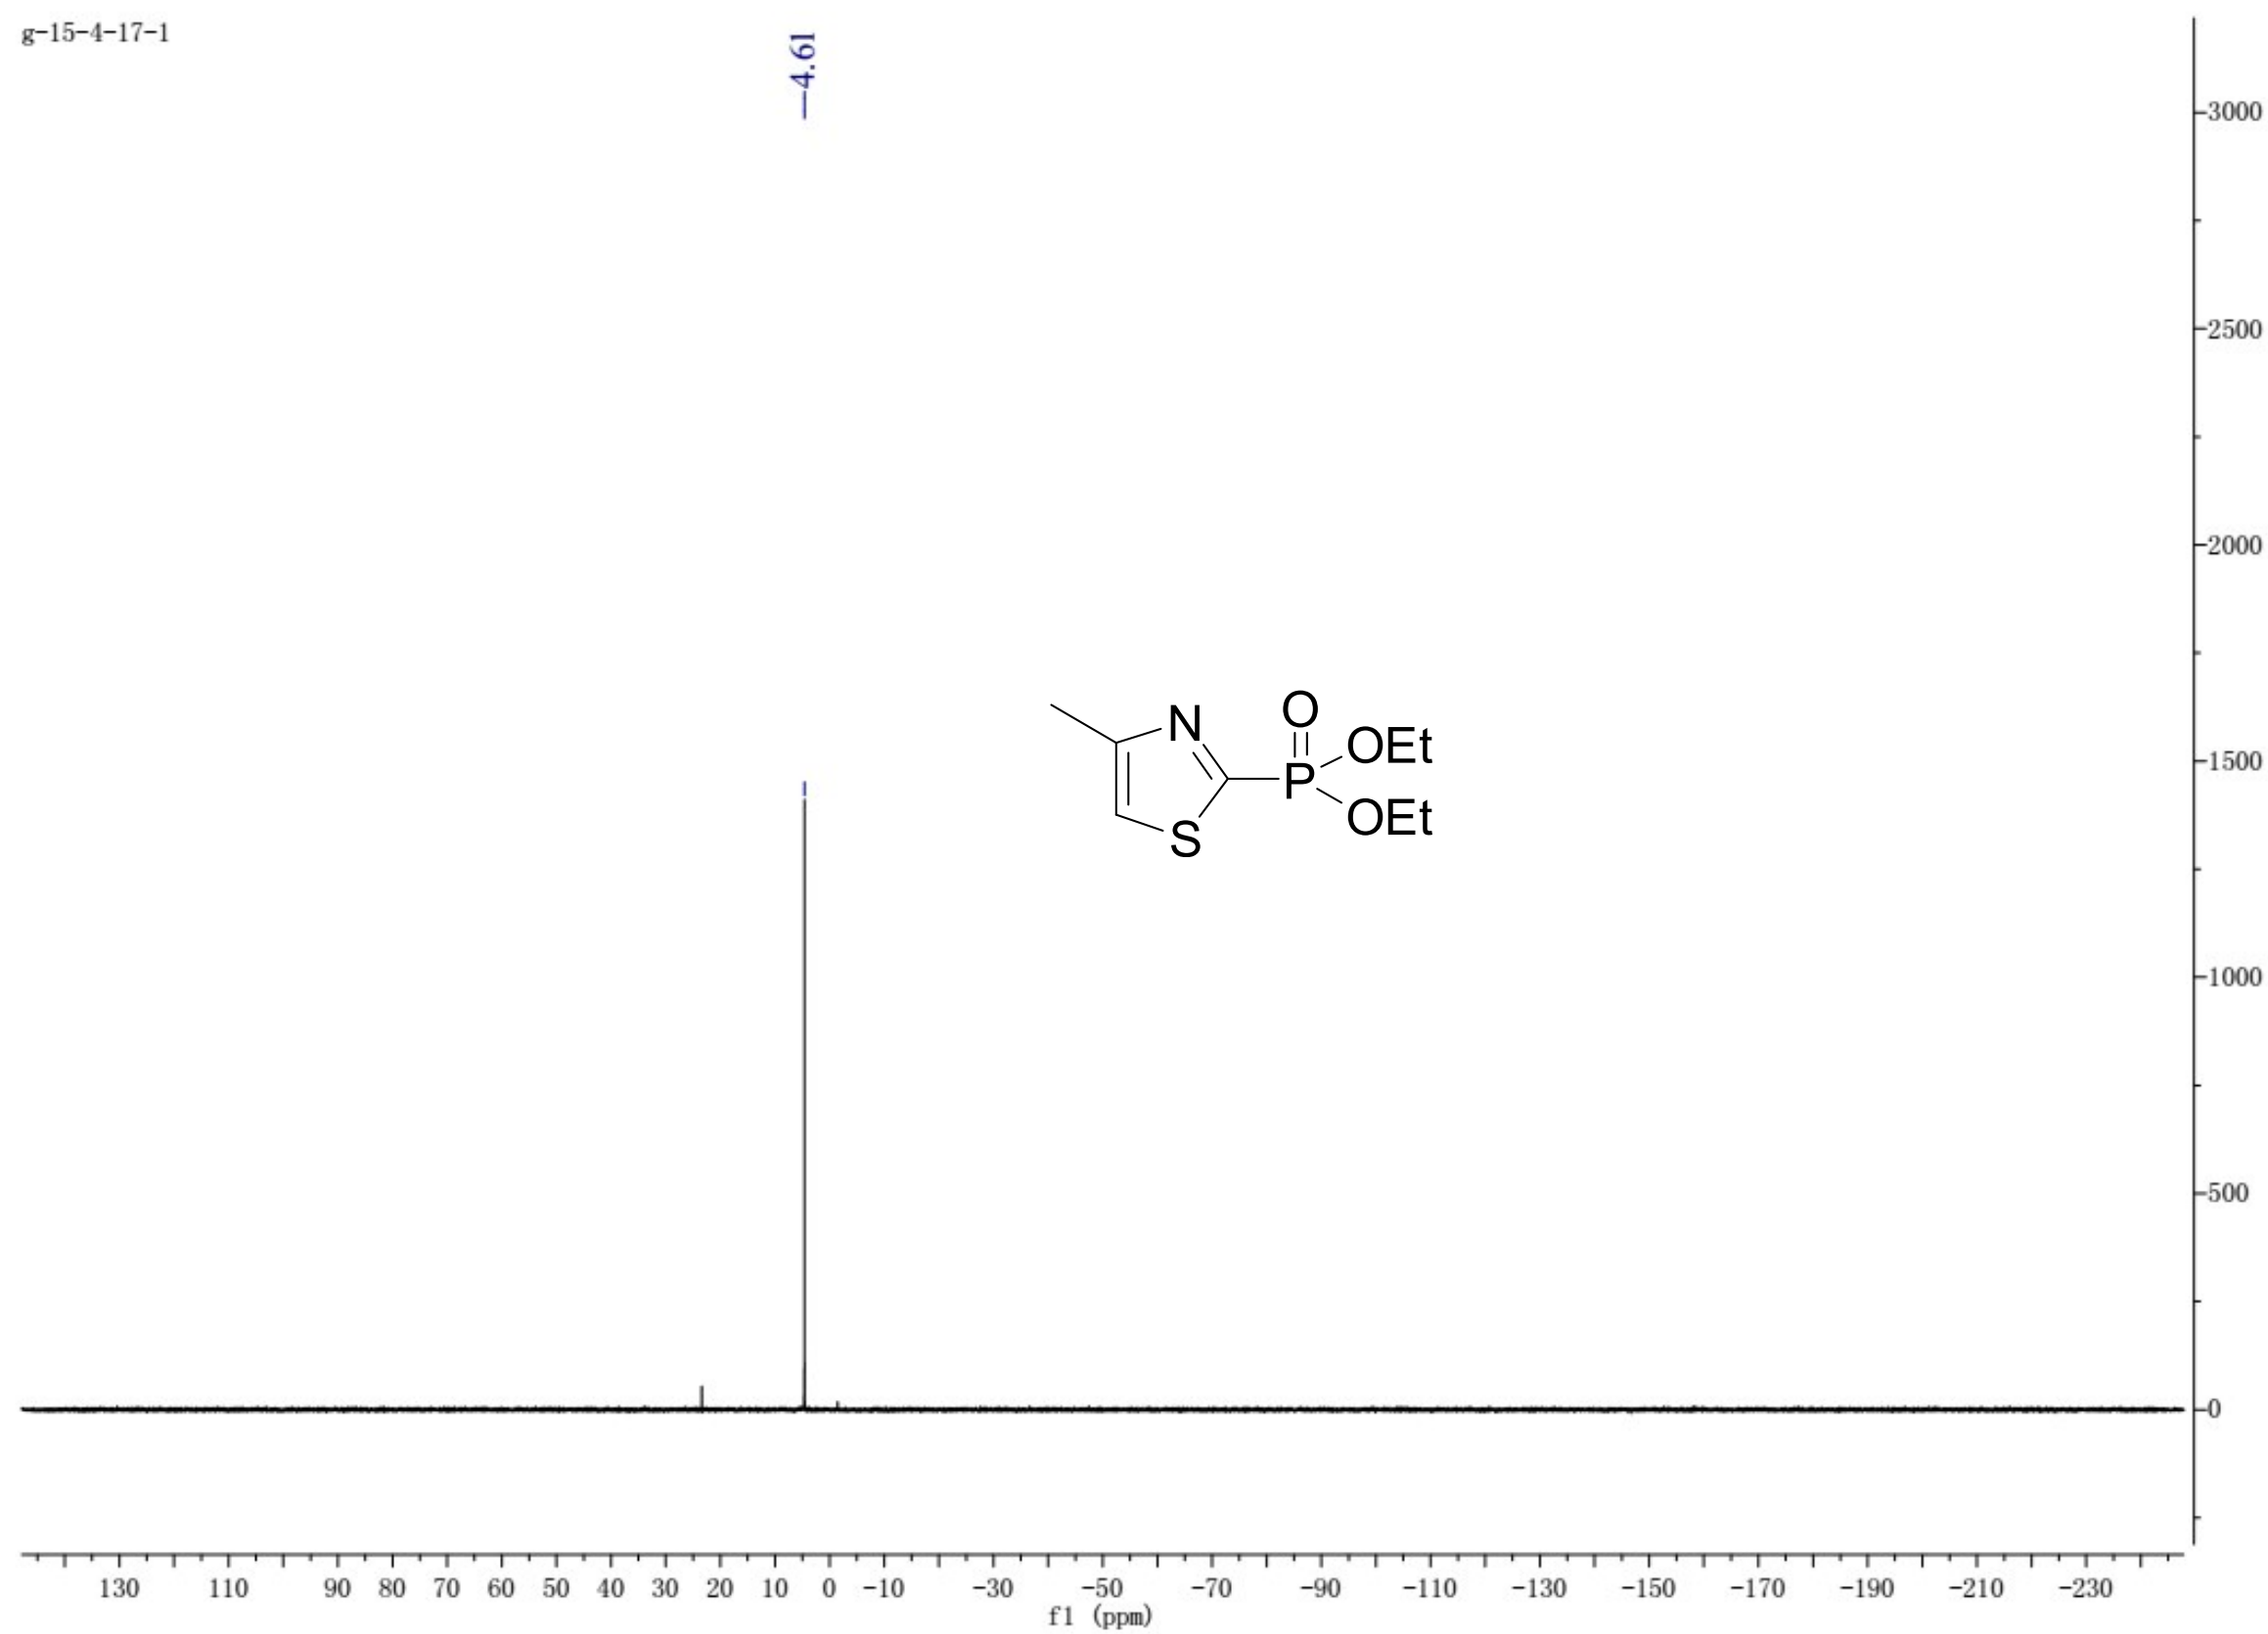

g-15-4-14-3

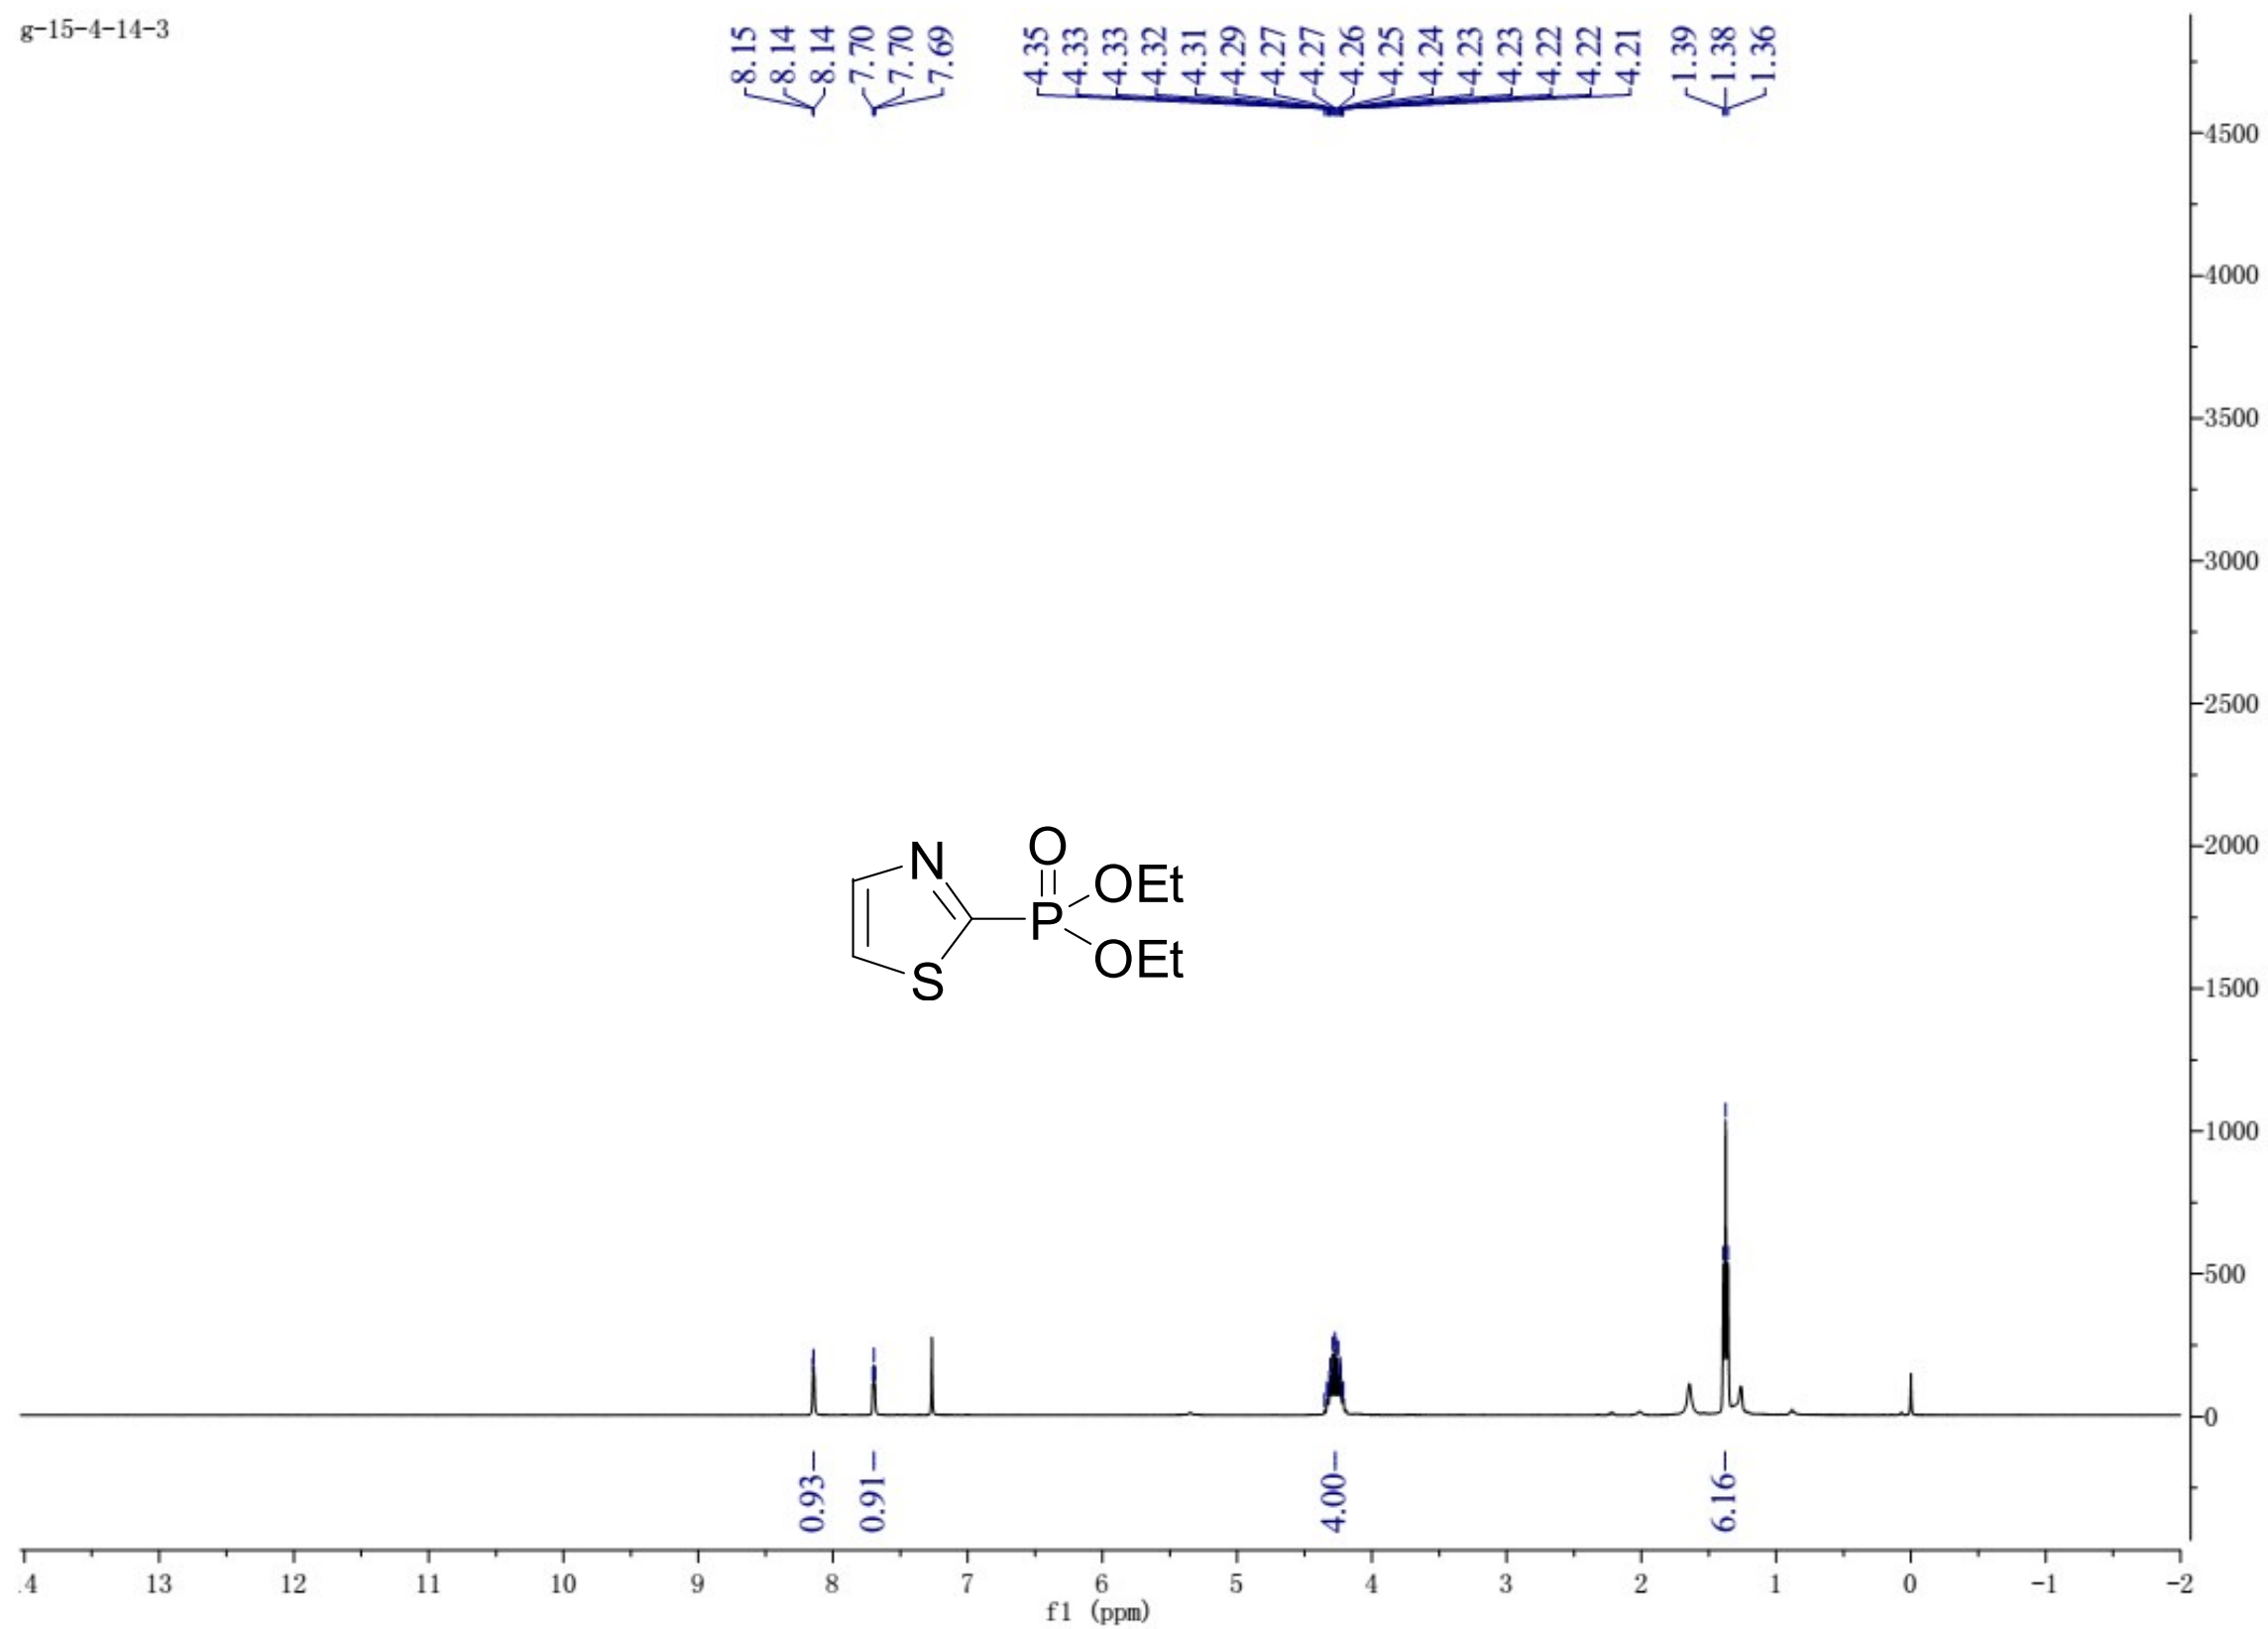

Y150445  
sample6 13C

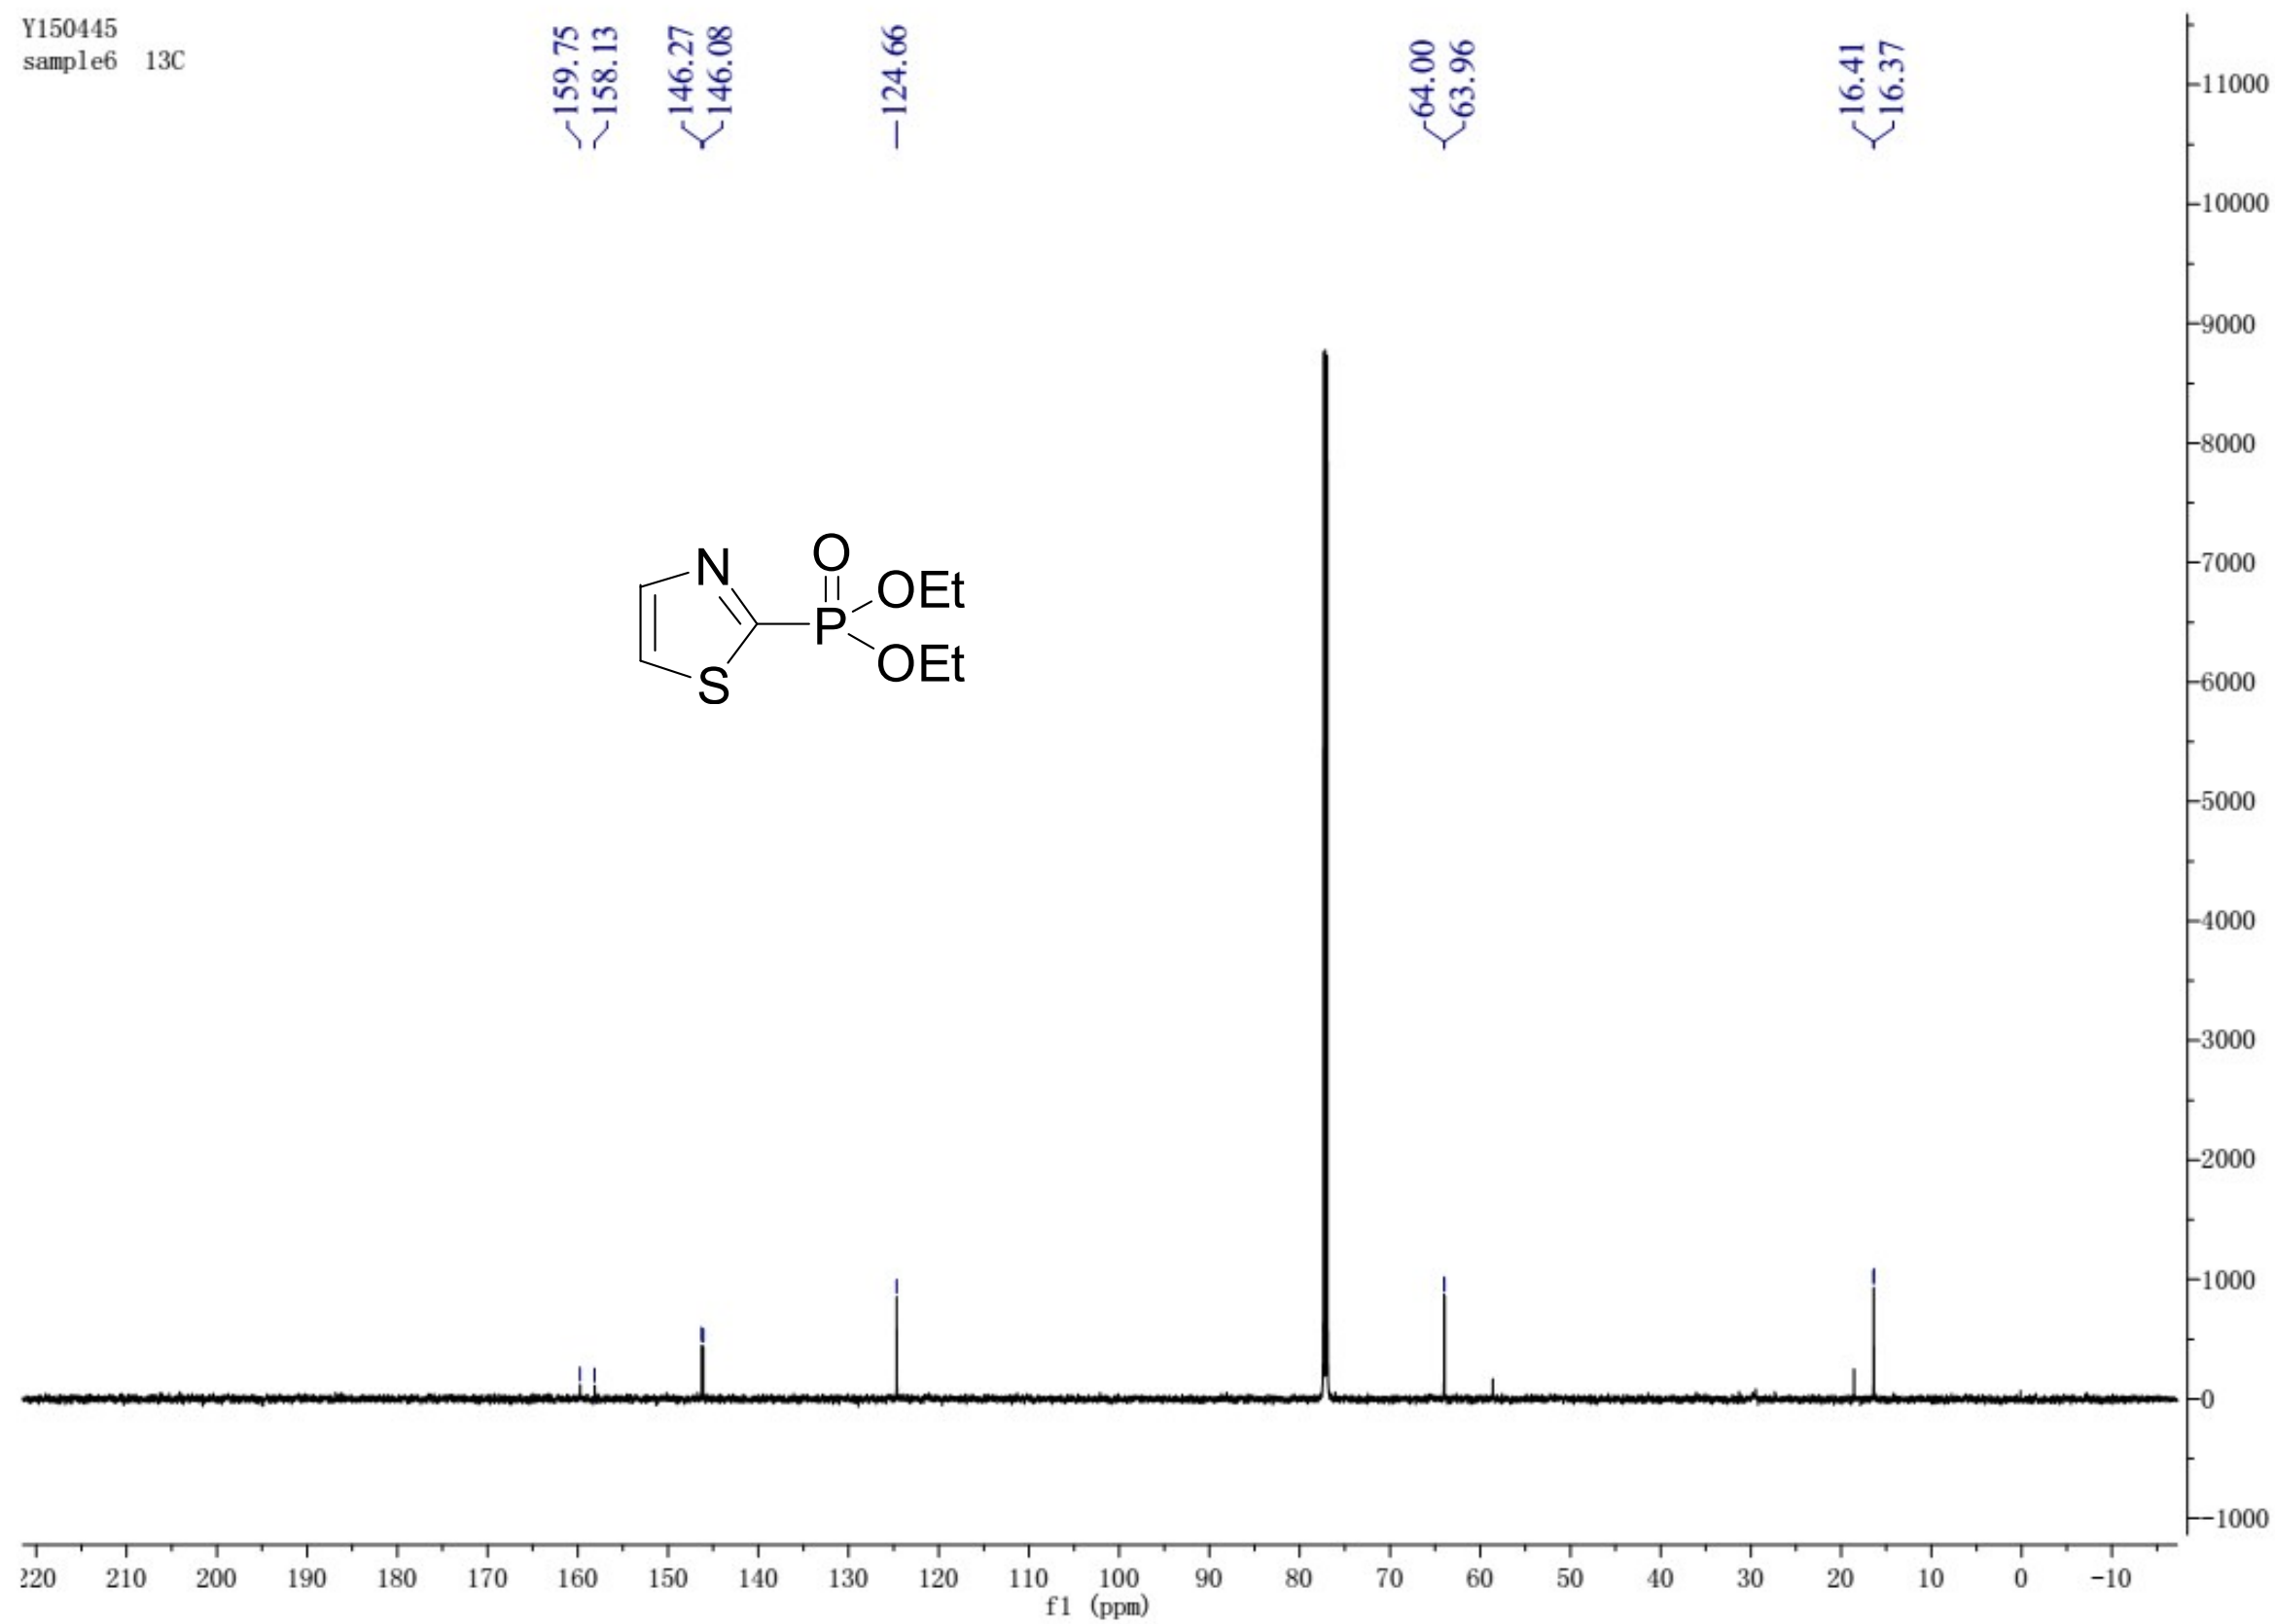

Y150445  
sample6 31P

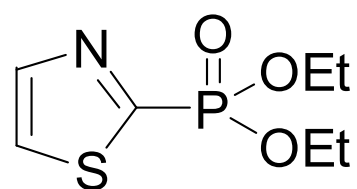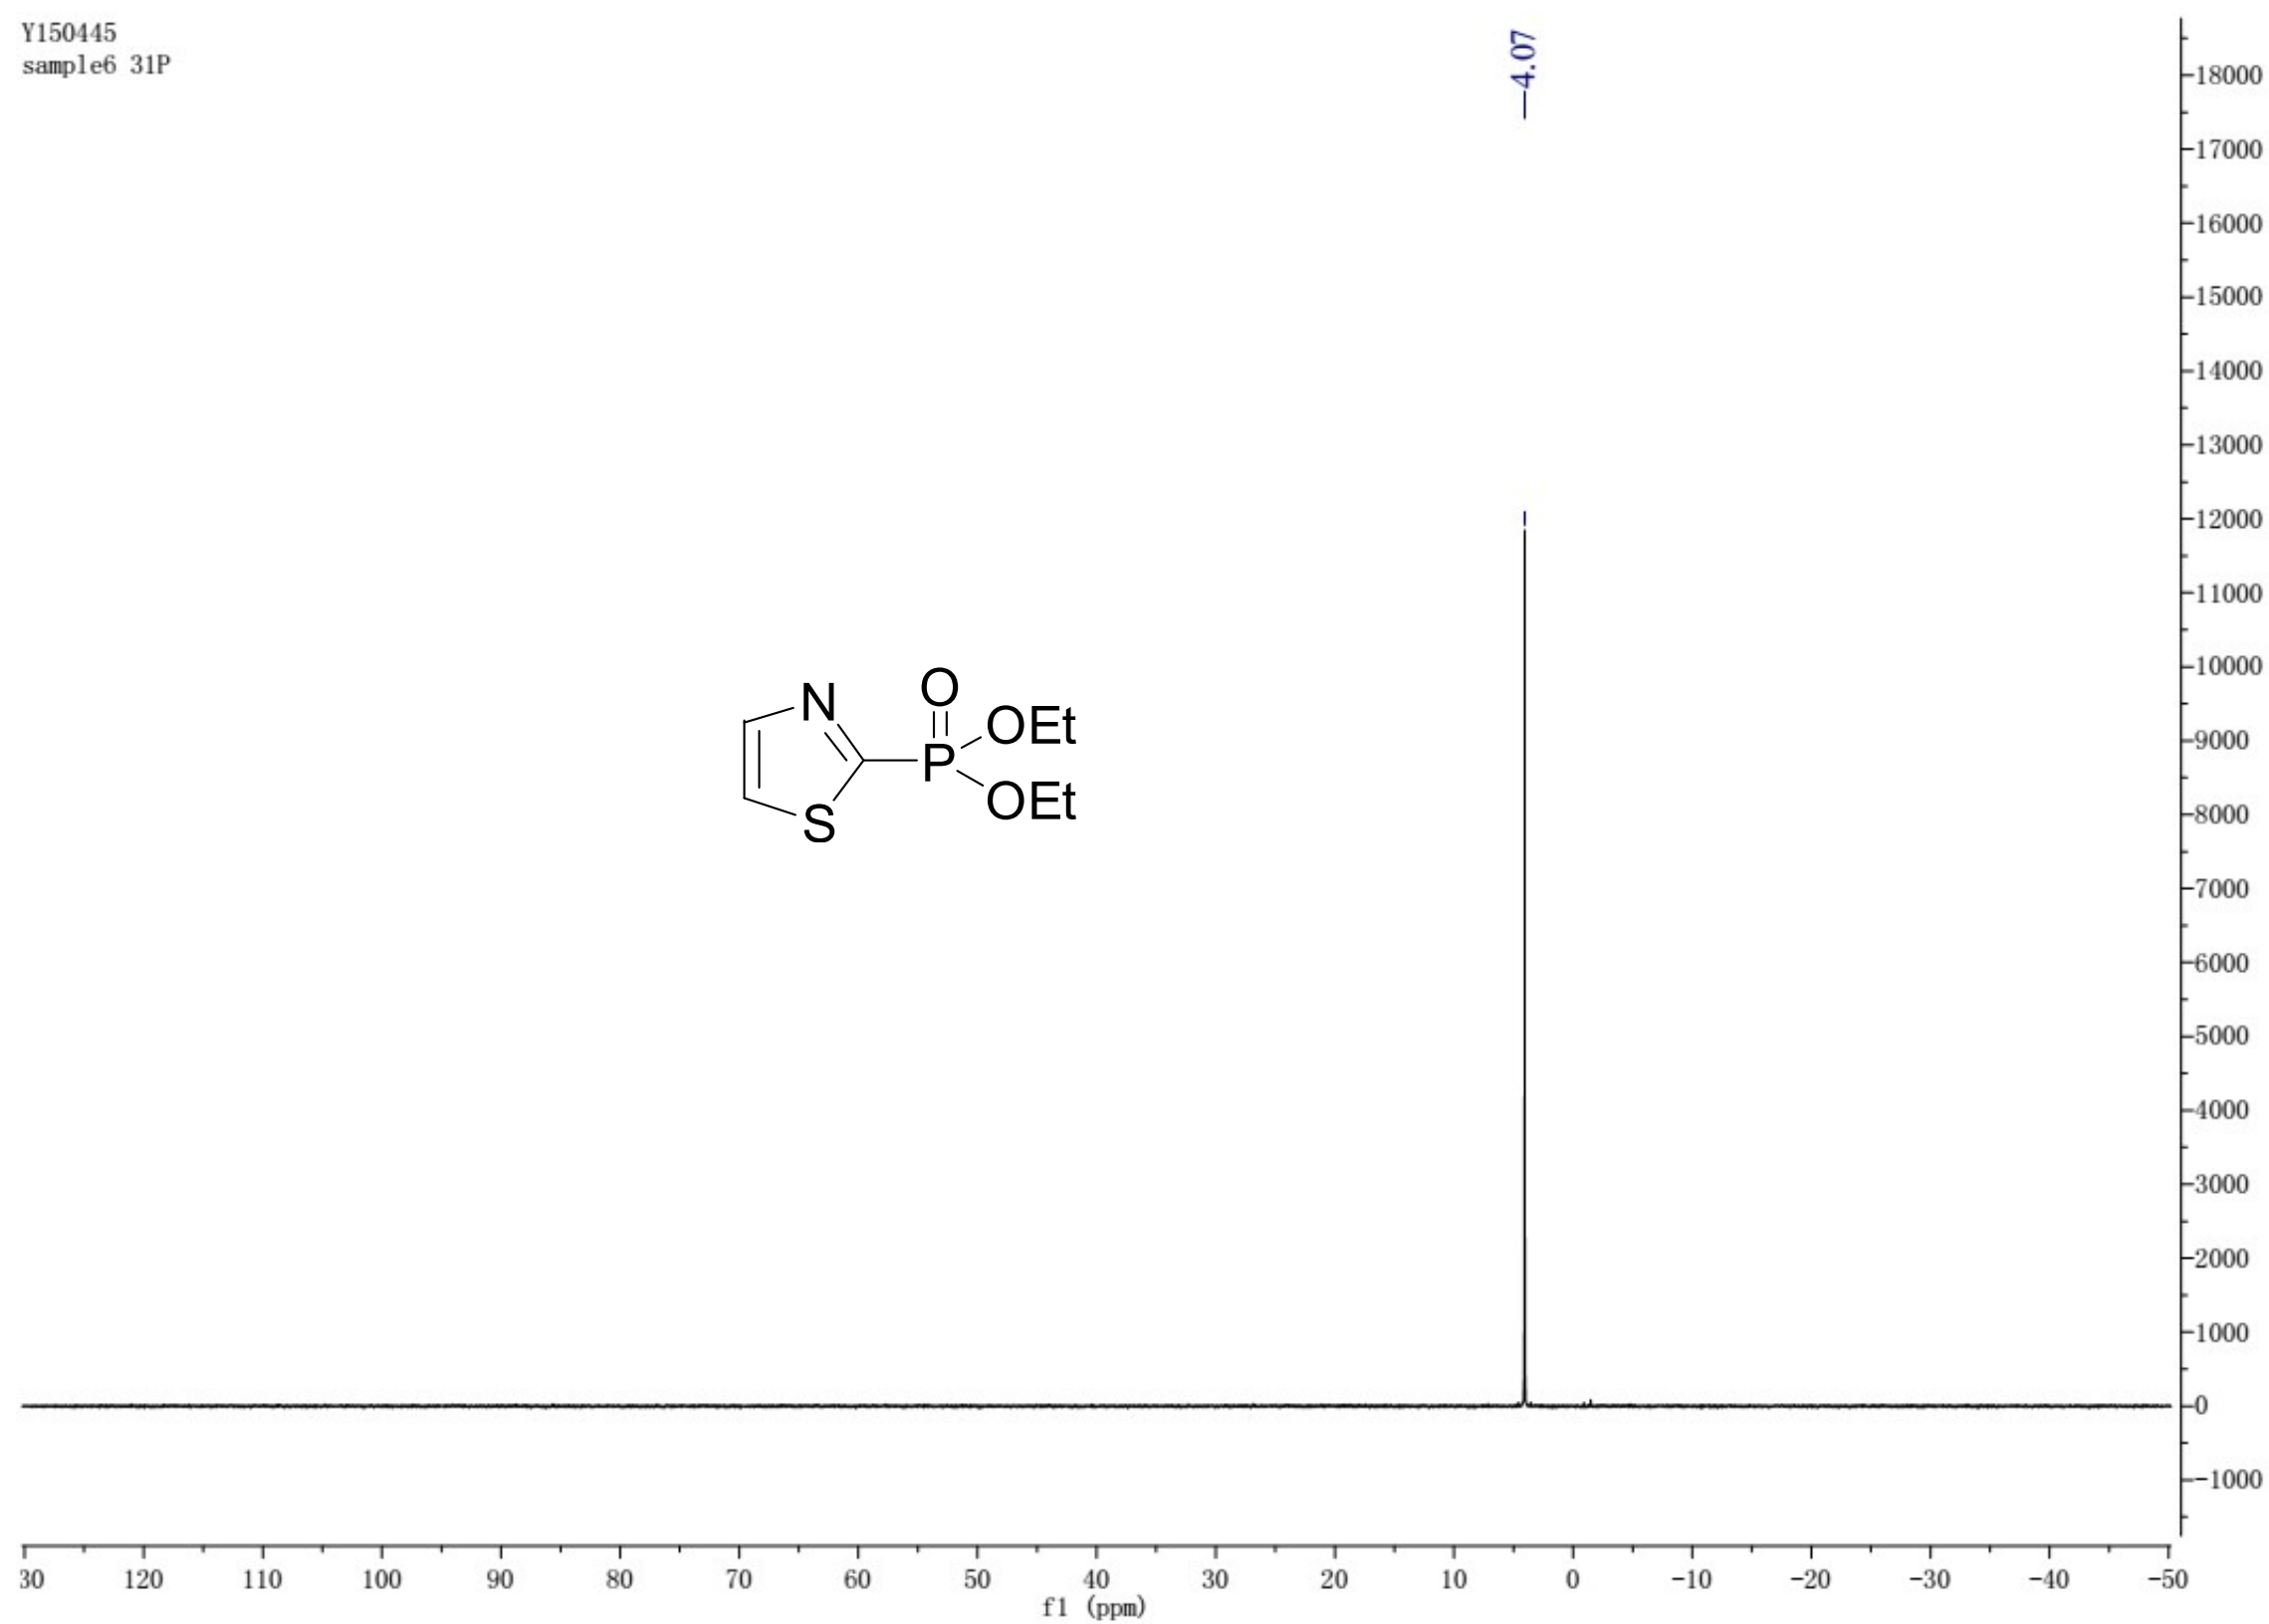

Supplement: c7qo00318h1.pdf [file c7qo00318h1.pdf]
